# Supplementary material for: Identification and Interaction Analysis of Significant Genes and MicroRNAs in Pterygium
Source: Biomed Res Int. 2019 Jun 25;2019:2767512. doi: 10.1155/2019/2767512 (PMC6614972; doi:10.1155/2019/2767512)
Supplement: Supplementary Materials — It is the complete list of original data from DAVID of differentially expressed genes (DEGs). There are 8 sheets, including downregulated DEGs-BP, downregulated DEGs-CC, downregulated DEGs-MF, downregulated DEGs-KEGG, upregulated DEGs-BP, upregulated DEGs-CC, upregulated DEGs-MF, and upregulated DEGs-KEGG, covering the biological process, cell component, molecular function, and pathway analysis of downregulated and upregulated DEGs, respectively (xlsx, 177kb). [file 2767512.f1.xlsx]

## Sheet: downregulated DEGs-BP
Category	Term	Count	%	PValue	Genes	List Total	Pop Hits	Pop Total	Fold Enrichment	Bonferroni	Benjamini	FDR
GOTERM_BP_FAT	GO:0010941~regulation of cell death	20	37.7358	1.83271e-08	EGR1, FGFR2, NR4A2, NR4A1, PMAIP1, SNAI2, SOX9, JUNB, FAM134B, ATF3, BTG2, DUSP1, JUN, TGM2, NDRG1, HSPD1, GADD45B, IGFBP3, MYC, BARD1	50	1509	16650	4.41352	4.69713e-05	4.69713e-05	3.24224e-05
GOTERM_BP_FAT	GO:0009628~response to abiotic stimulus	17	32.0755	1.94747e-08	EGR1, NR4A2, MME, KMO, PMAIP1, FOSB, SNAI2, SOX9, JUNB, FOS, BTG2, DUSP1, JUN, NDRG1, SCARA3, HSPD1, MYC	50	1029	16650	5.50146	4.99124e-05	2.49565e-05	3.44526e-05
GOTERM_BP_FAT	GO:1901698~response to nitrogen compound	16	30.1887	2.2701e-08	EGR1, NR4A2, NR4A1, FOSB, PMAIP1, SOX9, JUNB, PRKAR2B, FOS, BTG2, DUSP1, JUN, ASPH, HSPD1, PDGFD, MYC	50	895	16650	5.95307	5.81808e-05	1.9394e-05	4.01602e-05
GOTERM_BP_FAT	GO:0042981~regulation of apoptotic process	19	35.8491	3.66035e-08	EGR1, FGFR2, NR4A2, NR4A1, PMAIP1, SNAI2, SOX9, FAM134B, ATF3, BTG2, DUSP1, JUN, TGM2, NDRG1, HSPD1, GADD45B, IGFBP3, MYC, BARD1	50	1400	16650	4.51929	9.38105e-05	2.34534e-05	6.47552e-05
GOTERM_BP_FAT	GO:0010243~response to organonitrogen compound	15	28.3019	3.68892e-08	EGR1, NR4A2, NR4A1, FOSB, SOX9, JUNB, PRKAR2B, FOS, BTG2, DUSP1, JUN, ASPH, HSPD1, PDGFD, MYC	50	789	16650	6.3308	9.45426e-05	1.89092e-05	6.52606e-05
GOTERM_BP_FAT	GO:0043067~regulation of programmed cell death	19	35.8491	4.2216e-08	EGR1, FGFR2, NR4A2, NR4A1, PMAIP1, SNAI2, SOX9, FAM134B, ATF3, BTG2, DUSP1, JUN, TGM2, NDRG1, HSPD1, GADD45B, IGFBP3, MYC, BARD1	50	1413	16650	4.47771	0.000108194	1.80331e-05	7.46841e-05
GOTERM_BP_FAT	GO:0009719~response to endogenous stimulus	19	35.8491	1.70195e-07	EGR1, IER2, FGFR2, CLDN4, NR4A2, NR4A1, FOSB, SNAI2, SOX9, JUNB, PRKAR2B, FOS, BTG2, DUSP1, JUN, ASPH, HSPD1, PDGFD, MYC	50	1548	16650	4.08721	0.000436115	6.23138e-05	0.000301091
GOTERM_BP_FAT	GO:0014070~response to organic cyclic compound	15	28.3019	2.04304e-07	CLDN4, NR4A2, NR4A1, PMAIP1, FOSB, SNAI2, JUNB, PRKAR2B, FOS, BTG2, DUSP1, JUN, ASPH, HSPD1, MYC	50	906	16650	5.51325	0.000523495	6.54519e-05	0.000361434
GOTERM_BP_FAT	GO:0010033~response to organic substance	25	47.1698	2.28471e-07	FGFR2, IER2, HLA-DQB1, CLDN4, MME, PMAIP1, SOX9, PRKAR2B, FOS, TGM2, PDGFD, ASPH, MYC, EGR1, NR4A2, NR4A1, FOSB, SNAI2, JUNB, ATF3, BTG2, DUSP1, JUN, HSPD1, PPP1R15A	50	2822	16650	2.95004	0.0005854	6.50613e-05	0.000404186
GOTERM_BP_FAT	GO:0010604~positive regulation of macromolecule metabolic process	25	47.1698	2.87716e-07	FGFR2, PMAIP1, SOX9, PRKAR2B, FOS, PDGFD, ASPH, MYC, EGR1, NR4A2, NR4A1, FOSB, SNAI2, JUNB, TNNI2, ATF3, BTG2, JUN, MYRF, HSPD1, GADD45B, SMARCA2, PPP1R15A, IGFBP3, BARD1	50	2856	16650	2.91492	0.000737144	7.37388e-05	0.000508996
GOTERM_BP_FAT	GO:0012501~programmed cell death	20	37.7358	4.81697e-07	EGR1, FGFR2, NR4A2, NR4A1, PMAIP1, SNAI2, SOX9, FAM134B, ATF3, BTG2, DUSP1, JUN, TGM2, NDRG1, HSPD1, GADD45B, IGFBP3, MYC, PPP1R15A, BARD1	50	1852	16650	3.59611	0.00123383	0.000112229	0.000852165
GOTERM_BP_FAT	GO:0031324~negative regulation of cellular metabolic process	22	41.5094	8.86847e-07	EGR1, FGFR2, NR4A2, NR4A1, FOSB, SNAI2, SOX9, JUNB, PRKAR2B, ATF3, DUSP1, SRSF7, BTG2, JUN, HSPD1, GADD45B, IGFBP3, TFPI2, MYC, PPP1R15A, SMARCA2, BARD1	50	2345	16650	3.12409	0.00227041	0.000189398	0.00156891
GOTERM_BP_FAT	GO:0009893~positive regulation of metabolic process	25	47.1698	1.0166e-06	FGFR2, PMAIP1, SOX9, PRKAR2B, FOS, PDGFD, ASPH, MYC, EGR1, NR4A2, NR4A1, FOSB, SNAI2, JUNB, TNNI2, ATF3, BTG2, JUN, MYRF, HSPD1, GADD45B, SMARCA2, PPP1R15A, IGFBP3, BARD1	50	3052	16650	2.72772	0.00260215	0.000200406	0.00179845
GOTERM_BP_FAT	GO:0008219~cell death	20	37.7358	1.13957e-06	EGR1, FGFR2, NR4A2, NR4A1, PMAIP1, SNAI2, SOX9, FAM134B, ATF3, BTG2, DUSP1, JUN, TGM2, NDRG1, HSPD1, GADD45B, IGFBP3, MYC, PPP1R15A, BARD1	50	1958	16650	3.40143	0.00291646	0.000208601	0.00201599
GOTERM_BP_FAT	GO:0031325~positive regulation of cellular metabolic process	24	45.283	1.18338e-06	EGR1, FGFR2, NR4A2, NR4A1, FOSB, PMAIP1, SNAI2, SOX9, JUNB, TNNI2, PRKAR2B, FOS, ATF3, BTG2, JUN, MYRF, ASPH, HSPD1, PDGFD, GADD45B, IGFBP3, MYC, PPP1R15A, SMARCA2	50	2839	16650	2.81508	0.00302842	0.000202181	0.0020935
GOTERM_BP_FAT	GO:0000122~negative regulation of transcription from RNA polymerase II promoter	13	24.5283	1.23257e-06	EGR1, FGFR2, ATF3, BTG2, JUN, NR4A2, FOSB, SNAI2, SOX9, SMARCA2, PPP1R15A, MYC, JUNB	50	748	16650	5.78743	0.00315409	0.000197423	0.00218051
GOTERM_BP_FAT	GO:0051254~positive regulation of RNA metabolic process	17	32.0755	1.52724e-06	EGR1, FGFR2, NR4A2, NR4A1, FOSB, SOX9, JUNB, TNNI2, FOS, ATF3, BTG2, JUN, MYRF, ASPH, MYC, PPP1R15A, SMARCA2	50	1415	16650	4.00071	0.00390666	0.000230227	0.00270179
GOTERM_BP_FAT	GO:0070887~cellular response to chemical stimulus	23	43.3962	1.53435e-06	HLA-DQB1, EGR1, FGFR2, NR4A2, MME, CYP26A1, NR4A1, FOSB, PMAIP1, SNAI2, SOX9, JUNB, PRKAR2B, FOS, ATF3, DUSP1, JUN, TGM2, NDRG1, ASPH, PDGFD, MYC, PPP1R15A	50	2648	16650	2.89237	0.00392481	0.00021845	0.00271437
GOTERM_BP_FAT	GO:1901700~response to oxygen-containing compound	17	32.0755	2.43647e-06	EGR1, CLDN4, NR4A2, NR4A1, FOSB, SNAI2, SOX9, JUNB, PRKAR2B, FOS, BTG2, DUSP1, JUN, ASPH, HSPD1, PDGFD, MYC	50	1466	16650	3.86153	0.00622522	0.000328613	0.00431026
GOTERM_BP_FAT	GO:0051246~regulation of protein metabolic process	22	41.5094	2.78071e-06	EGR1, FGFR2, MME, NR4A1, PMAIP1, SNAI2, SOX9, PRKAR2B, ATF3, DUSP1, BTG2, JUN, EIF1, ASPH, HSPD1, PDGFD, GADD45B, IGFBP3, TFPI2, MYC, PPP1R15A, BARD1	50	2512	16650	2.9164	0.00710162	0.000356284	0.00491922
GOTERM_BP_FAT	GO:0046683~response to organophosphorus	7	13.2075	2.78613e-06	FOS, DUSP1, JUN, HSPD1, ASPH, FOSB, JUNB	50	136	16650	17.1397	0.00711544	0.000339984	0.00492883
GOTERM_BP_FAT	GO:0009892~negative regulation of metabolic process	22	41.5094	2.96815e-06	EGR1, FGFR2, NR4A2, NR4A1, FOSB, SNAI2, SOX9, JUNB, PRKAR2B, ATF3, DUSP1, SRSF7, BTG2, JUN, HSPD1, GADD45B, IGFBP3, TFPI2, MYC, PPP1R15A, SMARCA2, BARD1	50	2522	16650	2.90484	0.00757852	0.00034573	0.00525082
GOTERM_BP_FAT	GO:0009314~response to radiation	10	18.8679	3.06671e-06	EGR1, FOS, DUSP1, JUN, MME, SCARA3, PMAIP1, SNAI2, MYC, JUNB	50	418	16650	7.96651	0.00782918	0.00034168	0.00542517
GOTERM_BP_FAT	GO:0043066~negative regulation of apoptotic process	13	24.5283	3.13187e-06	FGFR2, NR4A2, NR4A1, SOX9, SNAI2, FAM134B, DUSP1, BTG2, JUN, TGM2, HSPD1, MYC, BARD1	50	818	16650	5.29218	0.00799486	0.000334402	0.00554043
GOTERM_BP_FAT	GO:0010605~negative regulation of macromolecule metabolic process	21	39.6226	3.54692e-06	EGR1, FGFR2, NR4A2, NR4A1, FOSB, SNAI2, SOX9, JUNB, PRKAR2B, ATF3, SRSF7, BTG2, DUSP1, JUN, GADD45B, IGFBP3, TFPI2, MYC, PPP1R15A, SMARCA2, BARD1	50	2326	16650	3.00645	0.00904957	0.000363564	0.00627465
GOTERM_BP_FAT	GO:0043069~negative regulation of programmed cell death	13	24.5283	3.59525e-06	FGFR2, NR4A2, NR4A1, SOX9, SNAI2, FAM134B, DUSP1, BTG2, JUN, TGM2, HSPD1, MYC, BARD1	50	829	16650	5.22195	0.00917231	0.000354346	0.00636015
GOTERM_BP_FAT	GO:0045893~positive regulation of transcription, DNA-templated	16	30.1887	4.43607e-06	EGR1, FGFR2, NR4A2, NR4A1, FOSB, SOX9, JUNB, TNNI2, FOS, ATF3, JUN, MYRF, ASPH, MYC, PPP1R15A, SMARCA2	50	1349	16650	3.94959	0.0113053	0.00042101	0.00784754
GOTERM_BP_FAT	GO:1903508~positive regulation of nucleic acid-templated transcription	16	30.1887	4.43607e-06	EGR1, FGFR2, NR4A2, NR4A1, FOSB, SOX9, JUNB, TNNI2, FOS, ATF3, JUN, MYRF, ASPH, MYC, PPP1R15A, SMARCA2	50	1349	16650	3.94959	0.0113053	0.00042101	0.00784754
GOTERM_BP_FAT	GO:0009725~response to hormone	13	24.5283	4.88074e-06	EGR1, CLDN4, NR4A2, NR4A1, FOSB, JUNB, PRKAR2B, FOS, BTG2, DUSP1, JUN, HSPD1, MYC	50	854	16650	5.06909	0.0124314	0.000446663	0.00863414
GOTERM_BP_FAT	GO:0006915~apoptotic process	18	33.9623	5.10478e-06	FGFR2, NR4A2, NR4A1, PMAIP1, SNAI2, SOX9, FAM134B, ATF3, BTG2, DUSP1, JUN, TGM2, HSPD1, GADD45B, IGFBP3, MYC, PPP1R15A, BARD1	50	1747	16650	3.43102	0.0129984	0.000451056	0.00903046
GOTERM_BP_FAT	GO:0042127~regulation of cell proliferation	17	32.0755	5.12402e-06	FGFR2, EGR1, NR4A1, PMAIP1, SNAI2, SOX9, JUNB, ATF3, BTG2, JUN, TGM2, NDRG1, PDGFD, LAMB1, IGFBP3, MYC, SMARCA2	50	1552	16650	3.64755	0.013047	0.000437668	0.00906451
GOTERM_BP_FAT	GO:0043065~positive regulation of apoptotic process	11	20.7547	5.19387e-06	ATF3, DUSP1, JUN, TGM2, NR4A1, HSPD1, PMAIP1, GADD45B, IGFBP3, MYC, BARD1	50	572	16650	6.40385	0.0132237	0.000429324	0.00918805
GOTERM_BP_FAT	GO:0014074~response to purine-containing compound	7	13.2075	5.30384e-06	FOS, DUSP1, JUN, HSPD1, ASPH, FOSB, JUNB	50	152	16650	15.3355	0.0135018	0.000424716	0.0093826
GOTERM_BP_FAT	GO:1902680~positive regulation of RNA biosynthetic process	16	30.1887	5.31595e-06	EGR1, FGFR2, NR4A2, NR4A1, FOSB, SOX9, JUNB, TNNI2, FOS, ATF3, JUN, MYRF, ASPH, MYC, PPP1R15A, SMARCA2	50	1369	16650	3.89189	0.0135324	0.000412788	0.00940402
GOTERM_BP_FAT	GO:0045934~negative regulation of nucleobase-containing compound metabolic process	16	30.1887	5.41204e-06	EGR1, FGFR2, NR4A2, FOSB, SNAI2, SOX9, JUNB, ATF3, SRSF7, BTG2, DUSP1, JUN, MYC, PPP1R15A, SMARCA2, BARD1	50	1371	16650	3.88621	0.0137753	0.00040789	0.00957398
GOTERM_BP_FAT	GO:0043068~positive regulation of programmed cell death	11	20.7547	5.60871e-06	ATF3, DUSP1, JUN, TGM2, NR4A1, HSPD1, PMAIP1, GADD45B, IGFBP3, MYC, BARD1	50	577	16650	6.34835	0.0142723	0.000410635	0.00992189
GOTERM_BP_FAT	GO:0010035~response to inorganic substance	10	18.8679	7.80104e-06	FOS, DUSP1, JUN, NDRG1, PDGFD, HSPD1, ASPH, FOSB, MYC, JUNB	50	469	16650	7.10021	0.0197956	0.000555238	0.0137999
GOTERM_BP_FAT	GO:0060548~negative regulation of cell death	13	24.5283	8.05989e-06	FGFR2, NR4A2, NR4A1, SOX9, SNAI2, FAM134B, DUSP1, BTG2, JUN, TGM2, HSPD1, MYC, BARD1	50	897	16650	4.82609	0.0204457	0.000558157	0.0142578
GOTERM_BP_FAT	GO:0051253~negative regulation of RNA metabolic process	15	28.3019	8.52303e-06	FGFR2, EGR1, NR4A2, FOSB, SNAI2, SOX9, JUNB, ATF3, SRSF7, BTG2, JUN, MYC, PPP1R15A, SMARCA2, BARD1	50	1240	16650	4.02823	0.0216078	0.000574693	0.015077
GOTERM_BP_FAT	GO:0010942~positive regulation of cell death	11	20.7547	8.75625e-06	ATF3, DUSP1, JUN, TGM2, NR4A1, HSPD1, PMAIP1, GADD45B, IGFBP3, MYC, BARD1	50	607	16650	6.0346	0.0221924	0.00057528	0.0154895
GOTERM_BP_FAT	GO:0045935~positive regulation of nucleobase-containing compound metabolic process	17	32.0755	1.19579e-05	EGR1, FGFR2, NR4A2, NR4A1, FOSB, SOX9, JUNB, TNNI2, FOS, ATF3, BTG2, JUN, MYRF, ASPH, MYC, PPP1R15A, SMARCA2	50	1658	16650	3.41435	0.0301833	0.000765911	0.0211525
GOTERM_BP_FAT	GO:0008283~cell proliferation	18	33.9623	1.1967e-05	EGR1, FGFR2, NR4A1, PMAIP1, SNAI2, SOX9, JUNB, ATF3, BTG2, JUN, TGM2, NDRG1, HSPD1, PDGFD, LAMB1, IGFBP3, MYC, SMARCA2	50	1861	16650	3.22085	0.030206	0.000747808	0.0211687
GOTERM_BP_FAT	GO:0071277~cellular response to calcium ion	5	9.43396	1.61522e-05	FOS, JUN, ASPH, FOSB, JUNB	50	52	16650	32.0192	0.0405533	0.000985193	0.028571
GOTERM_BP_FAT	GO:0048659~smooth muscle cell proliferation	6	11.3208	1.66228e-05	FGFR2, JUN, TGM2, PDGFD, IGFBP3, MYC	50	109	16650	18.3303	0.0417098	0.000990313	0.0294033
GOTERM_BP_FAT	GO:0051172~negative regulation of nitrogen compound metabolic process	16	30.1887	1.68911e-05	EGR1, FGFR2, NR4A2, FOSB, SNAI2, SOX9, JUNB, ATF3, SRSF7, BTG2, DUSP1, JUN, MYC, PPP1R15A, SMARCA2, BARD1	50	1506	16650	3.53785	0.0423686	0.000983433	0.0298778
GOTERM_BP_FAT	GO:0032268~regulation of cellular protein metabolic process	20	37.7358	1.69908e-05	EGR1, FGFR2, NR4A1, PMAIP1, SNAI2, SOX9, PRKAR2B, ATF3, BTG2, DUSP1, JUN, EIF1, ASPH, HSPD1, PDGFD, GADD45B, IGFBP3, TFPI2, MYC, PPP1R15A	50	2346	16650	2.83887	0.0426131	0.000967258	0.030054
GOTERM_BP_FAT	GO:0051726~regulation of cell cycle	13	24.5283	1.88597e-05	FGFR2, DUSP1, BTG2, JUN, OBSL1, NR4A1, NDRG1, SOX9, GADD45B, PPP1R15A, MYC, JUNB, BARD1	50	976	16650	4.43545	0.0471883	0.00105027	0.0333594
GOTERM_BP_FAT	GO:0048660~regulation of smooth muscle cell proliferation	6	11.3208	1.97965e-05	FGFR2, JUN, TGM2, PDGFD, IGFBP3, MYC	50	113	16650	17.6814	0.0494732	0.00107897	0.0350161
GOTERM_BP_FAT	GO:0051592~response to calcium ion	6	11.3208	2.4406e-05	FOS, DUSP1, JUN, ASPH, FOSB, JUNB	50	118	16650	16.9322	0.060637	0.00130235	0.0431678
GOTERM_BP_FAT	GO:0071310~cellular response to organic substance	19	35.8491	2.51793e-05	HLA-DQB1, FGFR2, EGR1, NR4A2, MME, NR4A1, FOSB, SNAI2, SOX9, JUNB, PRKAR2B, FOS, ATF3, DUSP1, JUN, TGM2, PDGFD, MYC, PPP1R15A	50	2186	16650	2.89433	0.0624971	0.00131618	0.0445353
GOTERM_BP_FAT	GO:0071495~cellular response to endogenous stimulus	14	26.4151	2.63878e-05	FGFR2, EGR1, NR4A2, NR4A1, FOSB, SOX9, SNAI2, JUNB, PRKAR2B, FOS, DUSP1, JUN, PDGFD, MYC	50	1185	16650	3.93418	0.0653965	0.00135174	0.0466723
GOTERM_BP_FAT	GO:0051173~positive regulation of nitrogen compound metabolic process	17	32.0755	2.6649e-05	EGR1, FGFR2, NR4A2, NR4A1, FOSB, SOX9, JUNB, TNNI2, FOS, ATF3, BTG2, JUN, MYRF, ASPH, MYC, PPP1R15A, SMARCA2	50	1767	16650	3.20374	0.066022	0.00133837	0.0471342
GOTERM_BP_FAT	GO:0033993~response to lipid	12	22.6415	3.13415e-05	FOS, DUSP1, CLDN4, JUN, NR4A2, NR4A1, HSPD1, FOSB, SNAI2, SOX9, MYC, JUNB	50	860	16650	4.64651	0.0771879	0.00154361	0.0554317
GOTERM_BP_FAT	GO:0010557~positive regulation of macromolecule biosynthetic process	16	30.1887	3.38782e-05	EGR1, FGFR2, NR4A2, NR4A1, FOSB, SOX9, JUNB, TNNI2, FOS, ATF3, JUN, MYRF, ASPH, MYC, PPP1R15A, SMARCA2	50	1597	16650	3.33626	0.0831683	0.00163699	0.0599169
GOTERM_BP_FAT	GO:0035914~skeletal muscle cell differentiation	5	9.43396	3.47045e-05	EGR1, FOS, ATF3, BTG2, NR4A1	50	63	16650	26.4286	0.085108	0.00164585	0.0613779
GOTERM_BP_FAT	GO:0010629~negative regulation of gene expression	15	28.3019	6.44827e-05	FGFR2, EGR1, NR4A2, FOSB, SNAI2, SOX9, JUNB, ATF3, SRSF7, BTG2, JUN, MYC, PPP1R15A, SMARCA2, BARD1	50	1485	16650	3.36364	0.152339	0.00300048	0.114015
GOTERM_BP_FAT	GO:0050673~epithelial cell proliferation	8	15.0943	6.50421e-05	FGFR2, JUN, NR4A1, SNAI2, SOX9, LAMB1, IGFBP3, MYC	50	347	16650	7.67723	0.153553	0.00297251	0.115003
GOTERM_BP_FAT	GO:0048661~positive regulation of smooth muscle cell proliferation	5	9.43396	6.54641e-05	FGFR2, JUN, TGM2, PDGFD, MYC	50	74	16650	22.5	0.154469	0.00293936	0.115749
GOTERM_BP_FAT	GO:0010628~positive regulation of gene expression	16	30.1887	6.64241e-05	EGR1, FGFR2, NR4A2, NR4A1, FOSB, SOX9, JUNB, TNNI2, FOS, ATF3, JUN, MYRF, ASPH, MYC, PPP1R15A, SMARCA2	50	1692	16650	3.14894	0.156547	0.00293105	0.117446
GOTERM_BP_FAT	GO:0009890~negative regulation of biosynthetic process	15	28.3019	7.40811e-05	FGFR2, EGR1, NR4A2, FOSB, SNAI2, SOX9, JUNB, ATF3, BTG2, DUSP1, JUN, HSPD1, MYC, PPP1R15A, SMARCA2	50	1504	16650	3.32114	0.172939	0.00321308	0.130976
GOTERM_BP_FAT	GO:0051247~positive regulation of protein metabolic process	15	28.3019	7.62548e-05	FGFR2, EGR1, PMAIP1, SOX9, SNAI2, PRKAR2B, JUN, ASPH, HSPD1, PDGFD, GADD45B, IGFBP3, MYC, PPP1R15A, BARD1	50	1508	16650	3.31233	0.177534	0.00325217	0.134816
GOTERM_BP_FAT	GO:0045892~negative regulation of transcription, DNA-templated	13	24.5283	7.93569e-05	EGR1, FGFR2, ATF3, BTG2, JUN, NR4A2, FOSB, SNAI2, SOX9, SMARCA2, PPP1R15A, MYC, JUNB	50	1130	16650	3.83097	0.184048	0.00332887	0.140297
GOTERM_BP_FAT	GO:0070848~response to growth factor	10	18.8679	8.34513e-05	FGFR2, IER2, EGR1, FOS, JUN, NR4A1, PDGFD, SNAI2, SOX9, MYC	50	634	16650	5.25237	0.192566	0.00344397	0.147531
GOTERM_BP_FAT	GO:2000113~negative regulation of cellular macromolecule biosynthetic process	14	26.4151	8.36284e-05	EGR1, FGFR2, ATF3, DUSP1, BTG2, JUN, NR4A2, FOSB, SNAI2, SOX9, SMARCA2, PPP1R15A, MYC, JUNB	50	1324	16650	3.52115	0.192933	0.00339657	0.147843
GOTERM_BP_FAT	GO:0031328~positive regulation of cellular biosynthetic process	16	30.1887	8.51859e-05	EGR1, FGFR2, NR4A2, NR4A1, FOSB, SOX9, JUNB, TNNI2, FOS, ATF3, JUN, MYRF, ASPH, MYC, PPP1R15A, SMARCA2	50	1729	16650	3.08155	0.196148	0.00340576	0.150595
GOTERM_BP_FAT	GO:0033002~muscle cell proliferation	6	11.3208	8.98177e-05	FGFR2, JUN, TGM2, PDGFD, IGFBP3, MYC	50	155	16650	12.8903	0.205636	0.00353548	0.158777
GOTERM_BP_FAT	GO:0060537~muscle tissue development	8	15.0943	9.24059e-05	FGFR2, EGR1, FOS, ATF3, BTG2, OBSL1, NR4A1, SOX9	50	367	16650	7.25886	0.210888	0.00358216	0.163349
GOTERM_BP_FAT	GO:0008285~negative regulation of cell proliferation	10	18.8679	0.000102145	FGFR2, BTG2, JUN, NDRG1, PMAIP1, SNAI2, SOX9, SMARCA2, IGFBP3, MYC	50	651	16650	5.11521	0.230344	0.00390001	0.180551
GOTERM_BP_FAT	GO:0071496~cellular response to external stimulus	7	13.2075	0.000102287	FOS, ATF3, JUN, NR4A2, PMAIP1, SNAI2, SOX9	50	257	16650	9.07004	0.230623	0.00384808	0.1808
GOTERM_BP_FAT	GO:0009891~positive regulation of biosynthetic process	16	30.1887	0.000104357	EGR1, FGFR2, NR4A2, NR4A1, FOSB, SOX9, JUNB, TNNI2, FOS, ATF3, JUN, MYRF, ASPH, MYC, PPP1R15A, SMARCA2	50	1760	16650	3.02727	0.234696	0.00386904	0.184458
GOTERM_BP_FAT	GO:0050679~positive regulation of epithelial cell proliferation	6	11.3208	0.000107439	FGFR2, JUN, NR4A1, SOX9, LAMB1, MYC	50	161	16650	12.4099	0.240718	0.0039263	0.1899
GOTERM_BP_FAT	GO:0033554~cellular response to stress	16	30.1887	0.000113467	EGR1, NR4A2, PMAIP1, SNAI2, FOS, ATF3, BTG2, JUN, NDRG1, SCARA3, PDGFD, GADD45B, TFPI2, MYC, PPP1R15A, BARD1	50	1773	16650	3.00508	0.252359	0.00408785	0.200544
GOTERM_BP_FAT	GO:1903507~negative regulation of nucleic acid-templated transcription	13	24.5283	0.000117221	EGR1, FGFR2, ATF3, BTG2, JUN, NR4A2, FOSB, SNAI2, SOX9, SMARCA2, PPP1R15A, MYC, JUNB	50	1177	16650	3.67799	0.259519	0.00416429	0.207173
GOTERM_BP_FAT	GO:1901724~positive regulation of cell proliferation involved in kidney development	3	5.66038	0.000126315	EGR1, PDGFD, MYC	50	6	16650	166.5	0.27658	0.00442532	0.223228
GOTERM_BP_FAT	GO:1902679~negative regulation of RNA biosynthetic process	13	24.5283	0.000134327	EGR1, FGFR2, ATF3, BTG2, JUN, NR4A2, FOSB, SNAI2, SOX9, SMARCA2, PPP1R15A, MYC, JUNB	50	1194	16650	3.62563	0.291286	0.00464194	0.237371
GOTERM_BP_FAT	GO:0001933~negative regulation of protein phosphorylation	8	15.0943	0.000141368	PRKAR2B, ATF3, DUSP1, JUN, GADD45B, IGFBP3, PPP1R15A, MYC	50	393	16650	6.77863	0.303962	0.0048197	0.249799
GOTERM_BP_FAT	GO:0048584~positive regulation of response to stimulus	17	32.0755	0.000144225	HLA-DQB1, FGFR2, PMAIP1, SOX9, ATF3, JUN, IGHD, TGM2, SCARA3, ASPH, HSPD1, PDGFD, GADD45B, CFD, IGFBP3, MYC, PPP1R15A	50	2030	16650	2.78867	0.309042	0.00485234	0.254841
GOTERM_BP_FAT	GO:0030335~positive regulation of cell migration	8	15.0943	0.000145872	SYNE2, JUN, SEMA3E, PDGFD, SNAI2, SOX9, LAMB1, MYC	50	395	16650	6.7443	0.311952	0.00484402	0.257747
GOTERM_BP_FAT	GO:0006366~transcription from RNA polymerase II promoter	16	30.1887	0.000152512	FGFR2, EGR1, NR4A2, NR4A1, FOSB, SNAI2, SOX9, JUNB, FOS, ATF3, SRSF7, BTG2, JUN, MYC, PPP1R15A, SMARCA2	50	1820	16650	2.92747	0.323565	0.00499925	0.269466
GOTERM_BP_FAT	GO:0010558~negative regulation of macromolecule biosynthetic process	14	26.4151	0.000167547	EGR1, FGFR2, ATF3, DUSP1, BTG2, JUN, NR4A2, FOSB, SNAI2, SOX9, SMARCA2, PPP1R15A, MYC, JUNB	50	1418	16650	3.28773	0.349139	0.00542144	0.295993
GOTERM_BP_FAT	GO:0045944~positive regulation of transcription from RNA polymerase II promoter	12	22.6415	0.000174859	FGFR2, EGR1, FOS, ATF3, JUN, NR4A2, NR4A1, FOSB, SOX9, SMARCA2, MYC, JUNB	50	1041	16650	3.83862	0.361226	0.00558688	0.308892
GOTERM_BP_FAT	GO:2000147~positive regulation of cell motility	8	15.0943	0.000180774	SYNE2, JUN, SEMA3E, PDGFD, SNAI2, SOX9, LAMB1, MYC	50	409	16650	6.51345	0.370838	0.00570423	0.319325
GOTERM_BP_FAT	GO:0051591~response to cAMP	5	9.43396	0.000195148	FOS, DUSP1, JUN, FOSB, JUNB	50	98	16650	16.9898	0.393598	0.00608158	0.344673
GOTERM_BP_FAT	GO:0090184~positive regulation of kidney development	4	7.54717	0.000203182	EGR1, PDGFD, SOX9, MYC	50	39	16650	34.1538	0.40596	0.00625516	0.35884
GOTERM_BP_FAT	GO:0051272~positive regulation of cellular component movement	8	15.0943	0.000212709	SYNE2, JUN, SEMA3E, PDGFD, SNAI2, SOX9, LAMB1, MYC	50	420	16650	6.34286	0.420293	0.00646983	0.375636
GOTERM_BP_FAT	GO:0040017~positive regulation of locomotion	8	15.0943	0.000218978	SYNE2, JUN, SEMA3E, PDGFD, SNAI2, SOX9, LAMB1, MYC	50	422	16650	6.3128	0.429535	0.00658181	0.386687
GOTERM_BP_FAT	GO:0031668~cellular response to extracellular stimulus	6	11.3208	0.000221806	FOS, ATF3, JUN, NR4A2, PMAIP1, SNAI2	50	188	16650	10.6277	0.433655	0.00658925	0.39167
GOTERM_BP_FAT	GO:0050678~regulation of epithelial cell proliferation	7	13.2075	0.000237248	FGFR2, JUN, NR4A1, SNAI2, SOX9, LAMB1, MYC	50	300	16650	7.77	0.455636	0.00696571	0.418884
GOTERM_BP_FAT	GO:0042326~negative regulation of phosphorylation	8	15.0943	0.000238689	PRKAR2B, ATF3, DUSP1, JUN, GADD45B, IGFBP3, PPP1R15A, MYC	50	428	16650	6.2243	0.457644	0.00692853	0.421423
GOTERM_BP_FAT	GO:0043523~regulation of neuron apoptotic process	6	11.3208	0.000250497	FAM134B, BTG2, JUN, NR4A2, HSPD1, PMAIP1	50	193	16650	10.3523	0.473816	0.0071887	0.442229
GOTERM_BP_FAT	GO:0031327~negative regulation of cellular biosynthetic process	14	26.4151	0.000256493	EGR1, FGFR2, ATF3, DUSP1, BTG2, JUN, NR4A2, FOSB, SNAI2, SOX9, SMARCA2, PPP1R15A, MYC, JUNB	50	1480	16650	3.15	0.481842	0.00727866	0.45279
GOTERM_BP_FAT	GO:0001763~morphogenesis of a branching structure	6	11.3208	0.000262733	FGFR2, SEMA3E, TGM2, SNAI2, SOX9, MYC	50	195	16650	10.2462	0.490065	0.00737348	0.463782
GOTERM_BP_FAT	GO:0010038~response to metal ion	7	13.2075	0.000273302	FOS, DUSP1, JUN, NDRG1, ASPH, FOSB, JUNB	50	308	16650	7.56818	0.503697	0.00758595	0.482396
GOTERM_BP_FAT	GO:0061061~muscle structure development	9	16.9811	0.000292903	FGFR2, EGR1, FOS, ATF3, BTG2, OBSL1, NR4A1, SOX9, IGFBP3	50	589	16650	5.08829	0.528021	0.00804083	0.516909
GOTERM_BP_FAT	GO:0009612~response to mechanical stimulus	6	11.3208	0.000302181	FOS, BTG2, JUN, FOSB, SOX9, JUNB	50	201	16650	9.9403	0.539115	0.00820664	0.533241
GOTERM_BP_FAT	GO:0051402~neuron apoptotic process	6	11.3208	0.000323516	FAM134B, BTG2, JUN, NR4A2, HSPD1, PMAIP1	50	204	16650	9.79412	0.563648	0.00869154	0.570788
GOTERM_BP_FAT	GO:0071363~cellular response to growth factor stimulus	9	16.9811	0.000370592	FGFR2, EGR1, FOS, JUN, NR4A1, PDGFD, SNAI2, SOX9, MYC	50	610	16650	4.91311	0.61326	0.00984707	0.653589
GOTERM_BP_FAT	GO:0032870~cellular response to hormone stimulus	9	16.9811	0.000395648	PRKAR2B, FOS, DUSP1, JUN, NR4A2, NR4A1, FOSB, MYC, JUNB	50	616	16650	4.86526	0.637324	0.0104017	0.697633
GOTERM_BP_FAT	GO:0032269~negative regulation of cellular protein metabolic process	11	20.7547	0.000526897	PRKAR2B, ATF3, DUSP1, BTG2, JUN, NR4A1, GADD45B, IGFBP3, PPP1R15A, MYC, TFPI2	50	992	16650	3.69254	0.740965	0.013689	0.928044
GOTERM_BP_FAT	GO:0090183~regulation of kidney development	4	7.54717	0.000534623	EGR1, PDGFD, SOX9, MYC	50	54	16650	24.6667	0.746047	0.0137491	0.941592
GOTERM_BP_FAT	GO:0014706~striated muscle tissue development	7	13.2075	0.000539329	FGFR2, EGR1, FOS, ATF3, BTG2, OBSL1, NR4A1	50	350	16650	6.66	0.749093	0.0137316	0.949843
GOTERM_BP_FAT	GO:0006357~regulation of transcription from RNA polymerase II promoter	15	28.3019	0.000601039	FGFR2, EGR1, NR4A2, NR4A1, FOSB, SNAI2, SOX9, JUNB, FOS, ATF3, BTG2, JUN, MYC, PPP1R15A, SMARCA2	50	1835	16650	2.72207	0.785817	0.0151409	1.05798
GOTERM_BP_FAT	GO:0071248~cellular response to metal ion	5	9.43396	0.00062411	FOS, JUN, ASPH, FOSB, JUNB	50	133	16650	12.5188	0.798122	0.0155648	1.09838
GOTERM_BP_FAT	GO:0009605~response to external stimulus	16	30.1887	0.000635334	NR4A2, NR4A1, FOSB, PMAIP1, SNAI2, SOX9, JUNB, FOS, ATF3, BTG2, JUN, IGHD, SEMA3E, TGM2, HSPD1, PDGFD	50	2073	16650	2.57019	0.80385	0.01569	1.11803
GOTERM_BP_FAT	GO:1901722~regulation of cell proliferation involved in kidney development	3	5.66038	0.000648244	EGR1, PDGFD, MYC	50	13	16650	76.8462	0.810239	0.0158536	1.14062
GOTERM_BP_FAT	GO:0032270~positive regulation of cellular protein metabolic process	13	24.5283	0.000664864	FGFR2, PRKAR2B, JUN, PDGFD, HSPD1, ASPH, PMAIP1, GADD45B, SNAI2, SOX9, IGFBP3, PPP1R15A, MYC	50	1420	16650	3.04859	0.818157	0.0161033	1.1697
GOTERM_BP_FAT	GO:0071774~response to fibroblast growth factor	5	9.43396	0.00067865	FGFR2, IER2, NR4A1, SNAI2, MYC	50	136	16650	12.2426	0.824474	0.0162808	1.19382
GOTERM_BP_FAT	GO:0043524~negative regulation of neuron apoptotic process	5	9.43396	0.000716835	FAM134B, BTG2, JUN, NR4A2, HSPD1	50	138	16650	12.0652	0.84085	0.01703	1.26059
GOTERM_BP_FAT	GO:0070371~ERK1 and ERK2 cascade	6	11.3208	0.000717826	FGFR2, ATF3, DUSP1, JUN, PDGFD, SOX9	50	243	16650	8.22222	0.841254	0.0168968	1.26232
GOTERM_BP_FAT	GO:0008284~positive regulation of cell proliferation	10	18.8679	0.000728716	FGFR2, EGR1, ATF3, JUN, TGM2, NR4A1, PDGFD, SOX9, LAMB1, MYC	50	849	16650	3.92226	0.845627	0.016995	1.28136
GOTERM_BP_FAT	GO:0030334~regulation of cell migration	9	16.9811	0.000797195	SYNE2, JUN, SEMA3E, PDGFD, SNAI2, SOX9, LAMB1, IGFBP3, MYC	50	685	16650	4.37518	0.870494	0.0184105	1.40097
GOTERM_BP_FAT	GO:0051248~negative regulation of protein metabolic process	11	20.7547	0.000814392	PRKAR2B, ATF3, DUSP1, BTG2, JUN, NR4A1, GADD45B, IGFBP3, PPP1R15A, MYC, TFPI2	50	1049	16650	3.4919	0.876082	0.0186362	1.43099
GOTERM_BP_FAT	GO:0048545~response to steroid hormone	7	13.2075	0.000840749	FOS, DUSP1, CLDN4, NR4A2, NR4A1, HSPD1, FOSB	50	381	16650	6.11811	0.884183	0.0190637	1.47698
GOTERM_BP_FAT	GO:0043618~regulation of transcription from RNA polymerase II promoter in response to stress	4	7.54717	0.000920343	EGR1, ATF3, JUN, PPP1R15A	50	65	16650	20.4923	0.905573	0.0206677	1.61573
GOTERM_BP_FAT	GO:1901214~regulation of neuron death	6	11.3208	0.000923178	FAM134B, BTG2, JUN, NR4A2, HSPD1, PMAIP1	50	257	16650	7.77432	0.906257	0.0205508	1.62067
GOTERM_BP_FAT	GO:0010563~negative regulation of phosphorus metabolic process	8	15.0943	0.00099867	PRKAR2B, ATF3, DUSP1, JUN, GADD45B, IGFBP3, PPP1R15A, MYC	50	544	16650	4.89706	0.922763	0.0220223	1.7521
GOTERM_BP_FAT	GO:0045936~negative regulation of phosphate metabolic process	8	15.0943	0.00099867	PRKAR2B, ATF3, DUSP1, JUN, GADD45B, IGFBP3, PPP1R15A, MYC	50	544	16650	4.89706	0.922763	0.0220223	1.7521
GOTERM_BP_FAT	GO:0006979~response to oxidative stress	7	13.2075	0.00100033	FOS, DUSP1, JUN, NR4A2, PDGFD, HSPD1, SCARA3	50	394	16650	5.91624	0.923091	0.0218705	1.75498
GOTERM_BP_FAT	GO:0035556~intracellular signal transduction	18	33.9623	0.00102428	FGFR2, PMAIP1, SNAI2, SOX9, PRKAR2B, ATF3, BTG2, DUSP1, JUN, TGM2, NDRG1, ASPH, PDGFD, GADD45B, IGFBP3, MYC, PPP1R15A, BARD1	50	2657	16650	2.25593	0.927674	0.0221992	1.79664
GOTERM_BP_FAT	GO:1902531~regulation of intracellular signal transduction	14	26.4151	0.00105186	FGFR2, PMAIP1, SOX9, SNAI2, ATF3, DUSP1, JUN, TGM2, ASPH, PDGFD, GADD45B, IGFBP3, MYC, BARD1	50	1714	16650	2.71995	0.932615	0.0225995	1.84459
GOTERM_BP_FAT	GO:0001822~kidney development	6	11.3208	0.00109466	FGFR2, EGR1, MME, PDGFD, SOX9, MYC	50	267	16650	7.48315	0.939624	0.0233135	1.91897
GOTERM_BP_FAT	GO:0071241~cellular response to inorganic substance	5	9.43396	0.00110523	FOS, JUN, ASPH, FOSB, JUNB	50	155	16650	10.7419	0.941238	0.0233421	1.93732
GOTERM_BP_FAT	GO:0071214~cellular response to abiotic stimulus	6	11.3208	0.00111303	EGR1, MME, SCARA3, SNAI2, SOX9, MYC	50	268	16650	7.45522	0.942403	0.023313	1.95087
GOTERM_BP_FAT	GO:0043620~regulation of DNA-templated transcription in response to stress	4	7.54717	0.00114155	EGR1, ATF3, JUN, PPP1R15A	50	70	16650	19.0286	0.946467	0.0237099	2.00038
GOTERM_BP_FAT	GO:0042493~response to drug	7	13.2075	0.00124319	PRKAR2B, FOS, JUN, HSPD1, FOSB, MYC, JUNB	50	411	16650	5.67153	0.958757	0.0255878	2.17665
GOTERM_BP_FAT	GO:2000145~regulation of cell motility	9	16.9811	0.00126768	SYNE2, JUN, SEMA3E, PDGFD, SNAI2, SOX9, LAMB1, IGFBP3, MYC	50	736	16650	4.07201	0.961269	0.0258779	2.21907
GOTERM_BP_FAT	GO:0070997~neuron death	6	11.3208	0.00128879	FAM134B, BTG2, JUN, NR4A2, HSPD1, PMAIP1	50	277	16650	7.213	0.963312	0.0260959	2.25564
GOTERM_BP_FAT	GO:0009966~regulation of signal transduction	18	33.9623	0.0013846	EGR1, FGFR2, NR4A2, CYP26A1, PMAIP1, SNAI2, SOX9, ATF3, DUSP1, JUN, TGM2, ASPH, PDGFD, GADD45B, IGFBP3, MYC, PPP1R15A, BARD1	50	2728	16650	2.19721	0.971309	0.0277905	2.42139
GOTERM_BP_FAT	GO:0051674~localization of cell	12	22.6415	0.0013908	IER2, SYNE2, JUN, SEMA3E, NR4A2, NR4A1, PDGFD, SNAI2, SOX9, LAMB1, IGFBP3, MYC	50	1330	16650	3.00451	0.971762	0.0276966	2.43211
GOTERM_BP_FAT	GO:0048870~cell motility	12	22.6415	0.0013908	IER2, SYNE2, JUN, SEMA3E, NR4A2, NR4A1, PDGFD, SNAI2, SOX9, LAMB1, IGFBP3, MYC	50	1330	16650	3.00451	0.971762	0.0276966	2.43211
GOTERM_BP_FAT	GO:0072001~renal system development	6	11.3208	0.00141688	FGFR2, EGR1, MME, PDGFD, SOX9, MYC	50	283	16650	7.06007	0.973591	0.0279917	2.47718
GOTERM_BP_FAT	GO:0031400~negative regulation of protein modification process	8	15.0943	0.00141857	PRKAR2B, ATF3, DUSP1, JUN, GADD45B, IGFBP3, PPP1R15A, MYC	50	578	16650	4.609	0.973705	0.0278103	2.48009
GOTERM_BP_FAT	GO:0009416~response to light stimulus	6	11.3208	0.00143911	FOS, DUSP1, MME, SCARA3, PMAIP1, MYC	50	284	16650	7.03521	0.975055	0.0279938	2.51558
GOTERM_BP_FAT	GO:0060070~canonical Wnt signaling pathway	6	11.3208	0.00143911	FGFR2, EGR1, NR4A2, SNAI2, SOX9, MYC	50	284	16650	7.03521	0.975055	0.0279938	2.51558
GOTERM_BP_FAT	GO:0072359~circulatory system development	10	18.8679	0.00155098	FGFR2, EGR1, JUN, SEMA3E, OBSL1, NR4A1, PDGFD, SNAI2, SOX9, JUNB	50	945	16650	3.52381	0.981281	0.0299117	2.7086
GOTERM_BP_FAT	GO:0072358~cardiovascular system development	10	18.8679	0.00155098	FGFR2, EGR1, JUN, SEMA3E, OBSL1, NR4A1, PDGFD, SNAI2, SOX9, JUNB	50	945	16650	3.52381	0.981281	0.0299117	2.7086
GOTERM_BP_FAT	GO:0007519~skeletal muscle tissue development	5	9.43396	0.0015539	EGR1, FOS, ATF3, BTG2, NR4A1	50	170	16650	9.79412	0.981421	0.0297437	2.71363
GOTERM_BP_FAT	GO:1901654~response to ketone	5	9.43396	0.0015539	FOS, DUSP1, CLDN4, FOSB, MYC	50	170	16650	9.79412	0.981421	0.0297437	2.71363
GOTERM_BP_FAT	GO:0032331~negative regulation of chondrocyte differentiation	3	5.66038	0.00155842	EFEMP1, SNAI2, SOX9	50	20	16650	49.95	0.981636	0.0296081	2.72144
GOTERM_BP_FAT	GO:0072111~cell proliferation involved in kidney development	3	5.66038	0.00155842	EGR1, PDGFD, MYC	50	20	16650	49.95	0.981636	0.0296081	2.72144
GOTERM_BP_FAT	GO:0048646~anatomical structure formation involved in morphogenesis	11	20.7547	0.00165028	FGFR2, DUSP1, JUN, SEMA3E, TGM2, OBSL1, NR4A1, SNAI2, SOX9, LAMB1, JUNB	50	1151	16650	3.18245	0.985494	0.0310971	2.87965
GOTERM_BP_FAT	GO:0040012~regulation of locomotion	9	16.9811	0.00166196	SYNE2, JUN, SEMA3E, PDGFD, SNAI2, SOX9, LAMB1, IGFBP3, MYC	50	768	16650	3.90234	0.985922	0.0310855	2.89974
GOTERM_BP_FAT	GO:1901215~negative regulation of neuron death	5	9.43396	0.00176445	FAM134B, BTG2, JUN, NR4A2, HSPD1	50	176	16650	9.46023	0.989179	0.0327337	3.07594
GOTERM_BP_FAT	GO:0061138~morphogenesis of a branching epithelium	5	9.43396	0.00180137	FGFR2, SEMA3E, TGM2, SOX9, MYC	50	177	16650	9.40678	0.990158	0.0331679	3.13934
GOTERM_BP_FAT	GO:0060538~skeletal muscle organ development	5	9.43396	0.00183883	EGR1, FOS, ATF3, BTG2, NR4A1	50	178	16650	9.35393	0.99106	0.0336054	3.20362
GOTERM_BP_FAT	GO:0042325~regulation of phosphorylation	12	22.6415	0.002018	FGFR2, PRKAR2B, ATF3, DUSP1, JUN, PDGFD, GADD45B, SOX9, IGFBP3, PPP1R15A, MYC, BARD1	50	1393	16650	2.86863	0.994357	0.036562	3.51054
GOTERM_BP_FAT	GO:0016477~cell migration	11	20.7547	0.00203731	SYNE2, JUN, SEMA3E, NR4A2, NR4A1, PDGFD, SNAI2, SOX9, LAMB1, IGFBP3, MYC	50	1184	16650	3.09375	0.99463	0.036647	3.54356
GOTERM_BP_FAT	GO:0048144~fibroblast proliferation	4	7.54717	0.00213435	JUN, PDGFD, PMAIP1, MYC	50	87	16650	15.3103	0.995815	0.0380937	3.70936
GOTERM_BP_FAT	GO:0051270~regulation of cellular component movement	9	16.9811	0.00218225	SYNE2, JUN, SEMA3E, PDGFD, SNAI2, SOX9, LAMB1, IGFBP3, MYC	50	802	16650	3.73691	0.996299	0.0386638	3.79109
GOTERM_BP_FAT	GO:0034097~response to cytokine	9	16.9811	0.00218225	HLA-DQB1, EGR1, FOS, JUN, TGM2, MME, SOX9, MYC, JUNB	50	802	16650	3.73691	0.996299	0.0386638	3.79109
GOTERM_BP_FAT	GO:0048145~regulation of fibroblast proliferation	4	7.54717	0.00220514	JUN, PDGFD, PMAIP1, MYC	50	88	16650	15.1364	0.996511	0.0387939	3.83013
GOTERM_BP_FAT	GO:0001655~urogenital system development	6	11.3208	0.0024249	FGFR2, EGR1, MME, PDGFD, SOX9, MYC	50	320	16650	6.24375	0.998016	0.042292	4.20416
GOTERM_BP_FAT	GO:0031399~regulation of protein modification process	13	24.5283	0.00263331	FGFR2, EGR1, PRKAR2B, ATF3, DUSP1, JUN, PDGFD, GADD45B, SNAI2, SOX9, IGFBP3, PPP1R15A, MYC	50	1664	16650	2.60156	0.998839	0.045538	4.5576
GOTERM_BP_FAT	GO:0061037~negative regulation of cartilage development	3	5.66038	0.00263588	EFEMP1, SNAI2, SOX9	50	26	16650	38.4231	0.998846	0.0452764	4.56195
GOTERM_BP_FAT	GO:0071417~cellular response to organonitrogen compound	7	13.2075	0.00263795	EGR1, PRKAR2B, NR4A2, NR4A1, PDGFD, SOX9, MYC	50	477	16650	4.88679	0.998852	0.04501	4.56545
GOTERM_BP_FAT	GO:0022008~neurogenesis	12	22.6415	0.00272594	FGFR2, IER2, BTG2, JUN, SEMA3E, MYRF, NR4A2, OBSL1, NDRG1, SOX9, LAMB1, MYC	50	1447	16650	2.76158	0.999085	0.0461712	4.71429
GOTERM_BP_FAT	GO:1902893~regulation of pri-miRNA transcription from RNA polymerase II promoter	3	5.66038	0.00284142	FOS, JUN, SOX9	50	27	16650	37	0.99932	0.0477672	4.9093
GOTERM_BP_FAT	GO:0000165~MAPK cascade	9	16.9811	0.00292976	FGFR2, ATF3, DUSP1, JUN, PDGFD, GADD45B, SOX9, IGFBP3, MYC	50	841	16650	3.56361	0.999458	0.0488973	5.05821
GOTERM_BP_FAT	GO:0007166~cell surface receptor signaling pathway	17	32.0755	0.00304921	HLA-DQB1, EGR1, FGFR2, EFEMP1, NR4A2, PMAIP1, SNAI2, SOX9, FOS, ATF3, JUN, IGHD, SEMA3E, TGM2, PDGFD, IGFBP3, MYC	50	2669	16650	2.12102	0.999601	0.0505144	5.25925
GOTERM_BP_FAT	GO:0002053~positive regulation of mesenchymal cell proliferation	3	5.66038	0.00305426	FGFR2, SOX9, MYC	50	28	16650	35.6786	0.999606	0.0502716	5.26773
GOTERM_BP_FAT	GO:0051252~regulation of RNA metabolic process	21	39.6226	0.00324663	EGR1, FGFR2, EFEMP1, NR4A2, NR4A1, FOSB, SNAI2, SOX9, JUNB, TNNI2, FOS, ATF3, BTG2, SRSF7, JUN, MYRF, ASPH, MYC, PPP1R15A, SMARCA2, BARD1	50	3762	16650	1.85885	0.99976	0.0530177	5.5906
GOTERM_BP_FAT	GO:0061614~pri-miRNA transcription from RNA polymerase II promoter	3	5.66038	0.00327436	FOS, JUN, SOX9	50	29	16650	34.4483	0.999776	0.0531211	5.63704
GOTERM_BP_FAT	GO:0000302~response to reactive oxygen species	5	9.43396	0.00334327	FOS, DUSP1, JUN, PDGFD, HSPD1	50	210	16650	7.92857	0.999813	0.0538699	5.75239
GOTERM_BP_FAT	GO:0043408~regulation of MAPK cascade	8	15.0943	0.00348819	FGFR2, ATF3, DUSP1, JUN, PDGFD, GADD45B, IGFBP3, MYC	50	678	16650	3.9292	0.999871	0.0557925	5.99454
GOTERM_BP_FAT	GO:0034654~nucleobase-containing compound biosynthetic process	23	43.3962	0.00350028	EGR1, FGFR2, EFEMP1, NR4A2, NR4A1, KMO, FOSB, SNAI2, SOX9, JUNB, TNNI2, FOS, ATF3, DUSP1, BTG2, SRSF7, JUN, MYRF, ASPH, MYC, PPP1R15A, SMARCA2, BARD1	50	4357	16650	1.75786	0.999875	0.0556343	6.01472
GOTERM_BP_FAT	GO:0030330~DNA damage response, signal transduction by p53 class mediator	4	7.54717	0.00373585	BTG2, NDRG1, PMAIP1, SNAI2	50	106	16650	12.566	0.999932	0.0589083	6.407
GOTERM_BP_FAT	GO:0023014~signal transduction by protein phosphorylation	9	16.9811	0.0037861	FGFR2, ATF3, DUSP1, JUN, PDGFD, GADD45B, SOX9, IGFBP3, MYC	50	877	16650	3.41733	0.99994	0.0593139	6.49047
GOTERM_BP_FAT	GO:0019219~regulation of nucleobase-containing compound metabolic process	22	41.5094	0.00391021	EGR1, FGFR2, EFEMP1, NR4A2, NR4A1, FOSB, SNAI2, SOX9, JUNB, TNNI2, FOS, ATF3, DUSP1, BTG2, SRSF7, JUN, MYRF, ASPH, MYC, PPP1R15A, SMARCA2, BARD1	50	4104	16650	1.78509	0.999956	0.0608307	6.69636
GOTERM_BP_FAT	GO:0001932~regulation of protein phosphorylation	11	20.7547	0.00402407	FGFR2, PRKAR2B, ATF3, DUSP1, JUN, PDGFD, GADD45B, SOX9, IGFBP3, PPP1R15A, MYC	50	1300	16650	2.81769	0.999968	0.0621727	6.88485
GOTERM_BP_FAT	GO:0051171~regulation of nitrogen compound metabolic process	23	43.3962	0.00403487	EGR1, FGFR2, EFEMP1, NR4A2, NR4A1, FOSB, SNAI2, SOX9, JUNB, TNNI2, FOS, ATF3, DUSP1, BTG2, SRSF7, JUN, MYRF, EIF1, ASPH, MYC, PPP1R15A, SMARCA2, BARD1	50	4404	16650	1.7391	0.999968	0.0619619	6.90271
GOTERM_BP_FAT	GO:0009968~negative regulation of signal transduction	10	18.8679	0.00405503	EGR1, ATF3, DUSP1, NR4A2, CYP26A1, SNAI2, SOX9, IGFBP3, PPP1R15A, MYC	50	1089	16650	3.05785	0.99997	0.0618924	6.93605
GOTERM_BP_FAT	GO:0051094~positive regulation of developmental process	10	18.8679	0.00405503	FGFR2, EGR1, FOS, JUN, MYRF, OBSL1, PDGFD, SOX9, IGFBP3, MYC	50	1089	16650	3.05785	0.99997	0.0618924	6.93605
GOTERM_BP_FAT	GO:0018130~heterocycle biosynthetic process	23	43.3962	0.0041202	EGR1, FGFR2, EFEMP1, NR4A2, NR4A1, KMO, FOSB, SNAI2, SOX9, JUNB, TNNI2, FOS, ATF3, DUSP1, BTG2, SRSF7, JUN, MYRF, ASPH, MYC, PPP1R15A, SMARCA2, BARD1	50	4411	16650	1.73634	0.999975	0.0624861	7.04372
GOTERM_BP_FAT	GO:0040011~locomotion	12	22.6415	0.00419933	IER2, SYNE2, JUN, SEMA3E, NR4A2, NR4A1, PDGFD, SNAI2, SOX9, LAMB1, IGFBP3, MYC	50	1530	16650	2.61176	0.999979	0.0632763	7.1743
GOTERM_BP_FAT	GO:2000116~regulation of cysteine-type endopeptidase activity	5	9.43396	0.00420763	NR4A1, HSPD1, ASPH, PMAIP1, MYC	50	224	16650	7.43304	0.99998	0.063028	7.18799
GOTERM_BP_FAT	GO:0071364~cellular response to epidermal growth factor stimulus	3	5.66038	0.00422648	SNAI2, SOX9, MYC	50	33	16650	30.2727	0.999981	0.0629349	7.21906
GOTERM_BP_FAT	GO:0010646~regulation of cell communication	18	33.9623	0.00423706	EGR1, FGFR2, NR4A2, CYP26A1, PMAIP1, SNAI2, SOX9, ATF3, DUSP1, JUN, TGM2, ASPH, PDGFD, GADD45B, IGFBP3, MYC, PPP1R15A, BARD1	50	3020	16650	1.98477	0.999981	0.0627242	7.2365
GOTERM_BP_FAT	GO:0019438~aromatic compound biosynthetic process	23	43.3962	0.00428279	EGR1, FGFR2, EFEMP1, NR4A2, NR4A1, KMO, FOSB, SNAI2, SOX9, JUNB, TNNI2, FOS, ATF3, DUSP1, BTG2, SRSF7, JUN, MYRF, ASPH, MYC, PPP1R15A, SMARCA2, BARD1	50	4424	16650	1.73124	0.999983	0.0630178	7.31184
GOTERM_BP_FAT	GO:0007517~muscle organ development	6	11.3208	0.00430818	FGFR2, EGR1, FOS, ATF3, BTG2, NR4A1	50	366	16650	5.45902	0.999984	0.0630192	7.35364
GOTERM_BP_FAT	GO:0052548~regulation of endopeptidase activity	6	11.3208	0.00461413	NR4A1, HSPD1, ASPH, PMAIP1, MYC, TFPI2	50	372	16650	5.37097	0.999993	0.0669701	7.85598
GOTERM_BP_FAT	GO:1901701~cellular response to oxygen-containing compound	9	16.9811	0.00479488	EGR1, PRKAR2B, FOS, NR4A2, NR4A1, PDGFD, SNAI2, SOX9, MYC	50	912	16650	3.28618	0.999996	0.0691165	8.15154
GOTERM_BP_FAT	GO:0043085~positive regulation of catalytic activity	12	22.6415	0.00484491	FGFR2, PRKAR2B, JUN, NR4A2, PDGFD, HSPD1, ASPH, PMAIP1, GADD45B, IGFBP3, PPP1R15A, MYC	50	1559	16650	2.56318	0.999996	0.0694243	8.23318
GOTERM_BP_FAT	GO:1902533~positive regulation of intracellular signal transduction	9	16.9811	0.00489018	FGFR2, JUN, TGM2, PDGFD, ASPH, PMAIP1, GADD45B, SOX9, IGFBP3	50	915	16650	3.27541	0.999997	0.0696631	8.30701
GOTERM_BP_FAT	GO:0060485~mesenchyme development	5	9.43396	0.00491031	FGFR2, SEMA3E, SNAI2, SOX9, MYC	50	234	16650	7.11538	0.999997	0.0695548	8.33981
GOTERM_BP_FAT	GO:0006928~movement of cell or subcellular component	13	24.5283	0.00491543	IER2, NR4A2, NR4A1, SOX9, SNAI2, TNNI2, SYNE2, JUN, SEMA3E, PDGFD, LAMB1, IGFBP3, MYC	50	1795	16650	2.4117	0.999997	0.0692433	8.34815
GOTERM_BP_FAT	GO:0007050~cell cycle arrest	5	9.43396	0.00498465	DUSP1, BTG2, PPP1R15A, MYC, BARD1	50	235	16650	7.08511	0.999997	0.0698034	8.46088
GOTERM_BP_FAT	GO:0010464~regulation of mesenchymal cell proliferation	3	5.66038	0.00501472	FGFR2, SOX9, MYC	50	36	16650	27.75	0.999997	0.06983	8.5098
GOTERM_BP_FAT	GO:0023051~regulation of signaling	18	33.9623	0.00504076	EGR1, FGFR2, NR4A2, CYP26A1, PMAIP1, SNAI2, SOX9, ATF3, DUSP1, JUN, TGM2, ASPH, PDGFD, GADD45B, IGFBP3, MYC, PPP1R15A, BARD1	50	3070	16650	1.95244	0.999998	0.0698024	8.55215
GOTERM_BP_FAT	GO:0061448~connective tissue development	5	9.43396	0.00505975	EGR1, EFEMP1, PDGFD, SNAI2, SOX9	50	236	16650	7.05508	0.999998	0.0696813	8.58303
GOTERM_BP_FAT	GO:0042770~signal transduction in response to DNA damage	4	7.54717	0.0051628	BTG2, NDRG1, PMAIP1, SNAI2	50	119	16650	11.1933	0.999998	0.0706741	8.75039
GOTERM_BP_FAT	GO:0070849~response to epidermal growth factor	3	5.66038	0.00529136	SNAI2, SOX9, MYC	50	37	16650	27	0.999999	0.0719902	8.95878
GOTERM_BP_FAT	GO:0042063~gliogenesis	5	9.43396	0.00536775	MYRF, NDRG1, SOX9, LAMB1, MYC	50	240	16650	6.9375	0.999999	0.0726093	9.08239
GOTERM_BP_FAT	GO:0042327~positive regulation of phosphorylation	9	16.9811	0.00545822	FGFR2, PRKAR2B, JUN, PDGFD, GADD45B, SOX9, IGFBP3, PPP1R15A, MYC	50	932	16650	3.21567	0.999999	0.0734041	9.22858
GOTERM_BP_FAT	GO:1901699~cellular response to nitrogen compound	7	13.2075	0.00567578	EGR1, PRKAR2B, NR4A2, NR4A1, PDGFD, SOX9, MYC	50	558	16650	4.17742	1	0.0758276	9.57922
GOTERM_BP_FAT	GO:0048585~negative regulation of response to stimulus	11	20.7547	0.00579941	EGR1, ATF3, DUSP1, SEMA3E, NR4A2, CYP26A1, SNAI2, SOX9, IGFBP3, PPP1R15A, MYC	50	1369	16650	2.67568	1	0.0770184	9.7779
GOTERM_BP_FAT	GO:0042542~response to hydrogen peroxide	4	7.54717	0.00591783	DUSP1, JUN, PDGFD, HSPD1	50	125	16650	10.656	1	0.0781291	9.96784
GOTERM_BP_FAT	GO:0052547~regulation of peptidase activity	6	11.3208	0.00599446	NR4A1, HSPD1, ASPH, PMAIP1, MYC, TFPI2	50	396	16650	5.04545	1	0.0786989	10.0905
GOTERM_BP_FAT	GO:0070372~regulation of ERK1 and ERK2 cascade	5	9.43396	0.00610627	FGFR2, ATF3, DUSP1, JUN, PDGFD	50	249	16650	6.68675	1	0.0797041	10.2693
GOTERM_BP_FAT	GO:0019220~regulation of phosphate metabolic process	12	22.6415	0.00617235	FGFR2, PRKAR2B, ATF3, DUSP1, JUN, PDGFD, GADD45B, SOX9, IGFBP3, PPP1R15A, MYC, BARD1	50	1610	16650	2.48199	1	0.0801271	10.3748
GOTERM_BP_FAT	GO:0051174~regulation of phosphorus metabolic process	12	22.6415	0.00620101	FGFR2, PRKAR2B, ATF3, DUSP1, JUN, PDGFD, GADD45B, SOX9, IGFBP3, PPP1R15A, MYC, BARD1	50	1611	16650	2.48045	1	0.0800809	10.4205
GOTERM_BP_FAT	GO:2001056~positive regulation of cysteine-type endopeptidase activity	4	7.54717	0.00631887	HSPD1, ASPH, PMAIP1, MYC	50	128	16650	10.4062	1	0.0811367	10.6082
GOTERM_BP_FAT	GO:0009411~response to UV	4	7.54717	0.00631887	MME, SCARA3, PMAIP1, MYC	50	128	16650	10.4062	1	0.0811367	10.6082
GOTERM_BP_FAT	GO:0032570~response to progesterone	3	5.66038	0.00646632	FOS, CLDN4, FOSB	50	41	16650	24.3659	1	0.0825436	10.8426
GOTERM_BP_FAT	GO:0050790~regulation of catalytic activity	15	28.3019	0.00654743	FGFR2, NR4A2, NR4A1, PMAIP1, PRKAR2B, DUSP1, JUN, ASPH, HSPD1, PDGFD, GADD45B, IGFBP3, TFPI2, MYC, PPP1R15A	50	2357	16650	2.11922	1	0.0831256	10.9713
GOTERM_BP_FAT	GO:0043434~response to peptide hormone	6	11.3208	0.00658027	EGR1, PRKAR2B, BTG2, NR4A2, NR4A1, MYC	50	405	16650	4.93333	1	0.0831159	11.0233
GOTERM_BP_FAT	GO:0044344~cellular response to fibroblast growth factor stimulus	4	7.54717	0.00659505	FGFR2, NR4A1, SNAI2, MYC	50	130	16650	10.2462	1	0.0828883	11.0467
GOTERM_BP_FAT	GO:0001568~blood vessel development	7	13.2075	0.0066041	FGFR2, EGR1, JUN, SEMA3E, NR4A1, PDGFD, JUNB	50	576	16650	4.04688	1	0.0825942	11.0611
GOTERM_BP_FAT	GO:2000112~regulation of cellular macromolecule biosynthetic process	21	39.6226	0.00661721	EGR1, FGFR2, EFEMP1, NR4A2, NR4A1, FOSB, SNAI2, SOX9, JUNB, TNNI2, FOS, ATF3, BTG2, DUSP1, JUN, MYRF, EIF1, ASPH, MYC, PPP1R15A, SMARCA2	50	3991	16650	1.75219	1	0.0823514	11.0819
GOTERM_BP_FAT	GO:0010648~negative regulation of cell communication	10	18.8679	0.00690801	EGR1, ATF3, DUSP1, NR4A2, CYP26A1, SNAI2, SOX9, IGFBP3, PPP1R15A, MYC	50	1182	16650	2.81726	1	0.0854103	11.5412
GOTERM_BP_FAT	GO:0023057~negative regulation of signaling	10	18.8679	0.00705871	EGR1, ATF3, DUSP1, NR4A2, CYP26A1, SNAI2, SOX9, IGFBP3, PPP1R15A, MYC	50	1186	16650	2.80776	1	0.0867797	11.7784
GOTERM_BP_FAT	GO:0007612~learning	4	7.54717	0.00731672	PRKAR2B, FOS, BTG2, JUN	50	135	16650	9.86667	1	0.0893897	12.183
GOTERM_BP_FAT	GO:0072006~nephron development	4	7.54717	0.00777135	EGR1, PDGFD, SOX9, MYC	50	138	16650	9.65217	1	0.0942473	12.8918
GOTERM_BP_FAT	GO:0010468~regulation of gene expression	22	41.5094	0.00793147	EGR1, FGFR2, EFEMP1, NR4A2, NR4A1, FOSB, SNAI2, SOX9, JUNB, TNNI2, FOS, ATF3, BTG2, SRSF7, JUN, MYRF, EIF1, ASPH, MYC, PPP1R15A, SMARCA2, BARD1	50	4345	16650	1.68608	1	0.0956501	13.1402
GOTERM_BP_FAT	GO:0097659~nucleic acid-templated transcription	20	37.7358	0.00803708	EGR1, FGFR2, EFEMP1, NR4A2, NR4A1, FOSB, SNAI2, SOX9, JUNB, TNNI2, FOS, ATF3, SRSF7, BTG2, JUN, MYRF, ASPH, MYC, PPP1R15A, SMARCA2	50	3771	16650	1.76611	1	0.0964137	13.3036
GOTERM_BP_FAT	GO:0010463~mesenchymal cell proliferation	3	5.66038	0.00808585	FGFR2, SOX9, MYC	50	46	16650	21.7174	1	0.0965222	13.379
GOTERM_BP_FAT	GO:0032330~regulation of chondrocyte differentiation	3	5.66038	0.00808585	EFEMP1, SNAI2, SOX9	50	46	16650	21.7174	1	0.0965222	13.379
GOTERM_BP_FAT	GO:0010950~positive regulation of endopeptidase activity	4	7.54717	0.00824238	HSPD1, ASPH, PMAIP1, MYC	50	141	16650	9.44681	1	0.0978501	13.6205
GOTERM_BP_FAT	GO:0007399~nervous system development	14	26.4151	0.00842389	IER2, FGFR2, NR4A2, SOX9, FOS, BTG2, JUN, SEMA3E, MYRF, OBSL1, NDRG1, LAMB1, MYC, SMARCA2	50	2170	16650	2.14839	1	0.0994444	13.8998
GOTERM_BP_FAT	GO:0072132~mesenchyme morphogenesis	3	5.66038	0.00842946	SNAI2, SOX9, MYC	50	47	16650	21.2553	1	0.0990531	13.9083
GOTERM_BP_FAT	GO:0051384~response to glucocorticoid	4	7.54717	0.00856557	FOS, DUSP1, HSPD1, FOSB	50	143	16650	9.31469	1	0.10012	14.1171
GOTERM_BP_FAT	GO:0001944~vasculature development	7	13.2075	0.00865382	FGFR2, EGR1, JUN, SEMA3E, NR4A1, PDGFD, JUNB	50	610	16650	3.82131	1	0.100645	14.2523
GOTERM_BP_FAT	GO:0010212~response to ionizing radiation	4	7.54717	0.00872993	EGR1, PMAIP1, SNAI2, MYC	50	144	16650	9.25	1	0.101032	14.3687
GOTERM_BP_FAT	GO:0009991~response to extracellular stimulus	6	11.3208	0.00882415	FOS, ATF3, JUN, NR4A2, PMAIP1, SNAI2	50	435	16650	4.5931	1	0.101613	14.5125
GOTERM_BP_FAT	GO:0035272~exocrine system development	3	5.66038	0.00913607	FGFR2, TGM2, SOX9	50	49	16650	20.3878	1	0.104558	14.9872
GOTERM_BP_FAT	GO:0010556~regulation of macromolecule biosynthetic process	21	39.6226	0.00922857	EGR1, FGFR2, EFEMP1, NR4A2, NR4A1, FOSB, SNAI2, SOX9, JUNB, TNNI2, FOS, ATF3, BTG2, DUSP1, JUN, MYRF, EIF1, ASPH, MYC, PPP1R15A, SMARCA2	50	4107	16650	1.7027	1	0.105097	15.1275
GOTERM_BP_FAT	GO:0048754~branching morphogenesis of an epithelial tube	4	7.54717	0.00923414	FGFR2, SEMA3E, SOX9, MYC	50	147	16650	9.06122	1	0.104695	15.136
GOTERM_BP_FAT	GO:0034645~cellular macromolecule biosynthetic process	24	45.283	0.00951982	EGR1, FGFR2, NDST4, EFEMP1, NR4A2, NR4A1, FOSB, SNAI2, SOX9, JUNB, TNNI2, FOS, ATF3, DUSP1, BTG2, SRSF7, JUN, MYRF, EIF1, ASPH, MYC, PPP1R15A, SMARCA2, BARD1	50	5012	16650	1.59457	1	0.107297	15.5678
GOTERM_BP_FAT	GO:0071478~cellular response to radiation	4	7.54717	0.00957959	EGR1, MME, SNAI2, MYC	50	149	16650	8.9396	1	0.107466	15.6579
GOTERM_BP_FAT	GO:1901652~response to peptide	6	11.3208	0.00958968	EGR1, PRKAR2B, BTG2, NR4A2, NR4A1, MYC	50	444	16650	4.5	1	0.107107	15.6731
GOTERM_BP_FAT	GO:0001666~response to hypoxia	5	9.43396	0.00985062	EGR1, NR4A2, NDRG1, HSPD1, PMAIP1	50	286	16650	5.82168	1	0.109396	16.0653
GOTERM_BP_FAT	GO:2000026~regulation of multicellular organismal development	12	22.6415	0.010065	FGFR2, EGR1, FOS, JUN, SEMA3E, EFEMP1, MYRF, OBSL1, PDGFD, SNAI2, SOX9, MYC	50	1721	16650	2.32191	1	0.111172	16.3863
GOTERM_BP_FAT	GO:0048468~cell development	13	24.5283	0.0101491	FGFR2, BTG2, JUN, SEMA3E, MYRF, NR4A2, OBSL1, NDRG1, SNAI2, SOX9, LAMB1, SMARCA2, MYC	50	1968	16650	2.1997	1	0.111573	16.5118
GOTERM_BP_FAT	GO:0060688~regulation of morphogenesis of a branching structure	3	5.66038	0.0102439	FGFR2, SNAI2, SOX9	50	52	16650	19.2115	1	0.112082	16.6531
GOTERM_BP_FAT	GO:0014910~regulation of smooth muscle cell migration	3	5.66038	0.0106257	PDGFD, IGFBP3, MYC	50	53	16650	18.8491	1	0.11554	17.2202
GOTERM_BP_FAT	GO:0010952~positive regulation of peptidase activity	4	7.54717	0.010661	HSPD1, ASPH, PMAIP1, MYC	50	155	16650	8.59355	1	0.115416	17.2723
GOTERM_BP_FAT	GO:0010562~positive regulation of phosphorus metabolic process	9	16.9811	0.0108624	FGFR2, PRKAR2B, JUN, PDGFD, GADD45B, SOX9, IGFBP3, PPP1R15A, MYC	50	1049	16650	2.85701	1	0.116984	17.5697
GOTERM_BP_FAT	GO:0045937~positive regulation of phosphate metabolic process	9	16.9811	0.0108624	FGFR2, PRKAR2B, JUN, PDGFD, GADD45B, SOX9, IGFBP3, PPP1R15A, MYC	50	1049	16650	2.85701	1	0.116984	17.5697
GOTERM_BP_FAT	GO:0036293~response to decreased oxygen levels	5	9.43396	0.0109452	EGR1, NR4A2, NDRG1, HSPD1, PMAIP1	50	295	16650	5.64407	1	0.117336	17.6918
GOTERM_BP_FAT	GO:0045597~positive regulation of cell differentiation	8	15.0943	0.0110284	FOS, JUN, OBSL1, SNAI2, SOX9, IGFBP3, MYC, JUNB	50	841	16650	3.16766	1	0.117689	17.8142
GOTERM_BP_FAT	GO:0031960~response to corticosteroid	4	7.54717	0.0112272	FOS, DUSP1, HSPD1, FOSB	50	158	16650	8.43038	1	0.119197	18.106
GOTERM_BP_FAT	GO:0006355~regulation of transcription, DNA-templated	19	35.8491	0.0112684	EGR1, FGFR2, EFEMP1, NR4A2, NR4A1, FOSB, SNAI2, SOX9, JUNB, TNNI2, FOS, ATF3, BTG2, JUN, MYRF, ASPH, MYC, PPP1R15A, SMARCA2	50	3603	16650	1.75604	1	0.119119	18.1662
GOTERM_BP_FAT	GO:0006351~transcription, DNA-templated	19	35.8491	0.0113332	EGR1, FGFR2, NR4A2, NR4A1, FOSB, SNAI2, SOX9, JUNB, TNNI2, FOS, ATF3, SRSF7, BTG2, JUN, MYRF, ASPH, MYC, PPP1R15A, SMARCA2	50	3605	16650	1.75506	1	0.119278	18.2611
GOTERM_BP_FAT	GO:0048146~positive regulation of fibroblast proliferation	3	5.66038	0.0114082	JUN, PDGFD, MYC	50	55	16650	18.1636	1	0.119534	18.3707
GOTERM_BP_FAT	GO:0031669~cellular response to nutrient levels	4	7.54717	0.0114198	ATF3, JUN, PMAIP1, SNAI2	50	159	16650	8.37736	1	0.119165	18.3876
GOTERM_BP_FAT	GO:0060737~prostate gland morphogenetic growth	2	3.77358	0.011721	FGFR2, SOX9	50	4	16650	166.5	1	0.121634	18.8264
GOTERM_BP_FAT	GO:0072126~positive regulation of glomerular mesangial cell proliferation	2	3.77358	0.011721	EGR1, PDGFD	50	4	16650	166.5	1	0.121634	18.8264
GOTERM_BP_FAT	GO:0032774~RNA biosynthetic process	20	37.7358	0.0117759	EGR1, FGFR2, EFEMP1, NR4A2, NR4A1, FOSB, SNAI2, SOX9, JUNB, TNNI2, FOS, ATF3, SRSF7, BTG2, JUN, MYRF, ASPH, MYC, PPP1R15A, SMARCA2	50	3905	16650	1.70551	1	0.121682	18.9061
GOTERM_BP_FAT	GO:0016055~Wnt signaling pathway	6	11.3208	0.0118539	FGFR2, EGR1, NR4A2, SNAI2, SOX9, MYC	50	468	16650	4.26923	1	0.121953	19.0193
GOTERM_BP_FAT	GO:0198738~cell-cell signaling by wnt	6	11.3208	0.0119555	FGFR2, EGR1, NR4A2, SNAI2, SOX9, MYC	50	469	16650	4.26013	1	0.12245	19.1665
GOTERM_BP_FAT	GO:1903506~regulation of nucleic acid-templated transcription	19	35.8491	0.0119991	EGR1, FGFR2, EFEMP1, NR4A2, NR4A1, FOSB, SNAI2, SOX9, JUNB, TNNI2, FOS, ATF3, BTG2, JUN, MYRF, ASPH, MYC, PPP1R15A, SMARCA2	50	3625	16650	1.74538	1	0.122384	19.2295
GOTERM_BP_FAT	GO:0045786~negative regulation of cell cycle	6	11.3208	0.0120577	DUSP1, BTG2, NR4A1, PPP1R15A, MYC, BARD1	50	470	16650	4.25106	1	0.122464	19.3143
GOTERM_BP_FAT	GO:0014909~smooth muscle cell migration	3	5.66038	0.0122153	PDGFD, IGFBP3, MYC	50	57	16650	17.5263	1	0.123485	19.5417
GOTERM_BP_FAT	GO:2001141~regulation of RNA biosynthetic process	19	35.8491	0.0126608	EGR1, FGFR2, EFEMP1, NR4A2, NR4A1, FOSB, SNAI2, SOX9, JUNB, TNNI2, FOS, ATF3, BTG2, JUN, MYRF, ASPH, MYC, PPP1R15A, SMARCA2	50	3644	16650	1.73628	1	0.127219	20.1813
GOTERM_BP_FAT	GO:0072331~signal transduction by p53 class mediator	4	7.54717	0.0128213	BTG2, NDRG1, PMAIP1, SNAI2	50	166	16650	8.0241	1	0.128234	20.4105
GOTERM_BP_FAT	GO:0014031~mesenchymal cell development	4	7.54717	0.0130292	FGFR2, SEMA3E, SNAI2, SOX9	50	167	16650	7.97605	1	0.129683	20.7065
GOTERM_BP_FAT	GO:0045595~regulation of cell differentiation	11	20.7547	0.0131208	FGFR2, FOS, JUN, SEMA3E, EFEMP1, OBSL1, SNAI2, SOX9, IGFBP3, MYC, JUNB	50	1544	16650	2.37241	1	0.130037	20.8365
GOTERM_BP_FAT	GO:0070482~response to oxygen levels	5	9.43396	0.0135082	EGR1, NR4A2, NDRG1, HSPD1, PMAIP1	50	314	16650	5.30255	1	0.133123	21.3845
GOTERM_BP_FAT	GO:0001667~ameboidal-type cell migration	5	9.43396	0.0143907	SYNE2, JUN, SEMA3E, NR4A1, SOX9	50	320	16650	5.20312	1	0.140701	22.6194
GOTERM_BP_FAT	GO:1990441~negative regulation of transcription from RNA polymerase II promoter in response to endoplasmic reticulum stress	2	3.77358	0.0146301	JUN, PPP1R15A	50	5	16650	133.2	1	0.142344	22.9513
GOTERM_BP_FAT	GO:0071504~cellular response to heparin	2	3.77358	0.0146301	EGR1, SOX9	50	5	16650	133.2	1	0.142344	22.9513
GOTERM_BP_FAT	GO:0071865~regulation of apoptotic process in bone marrow	2	3.77358	0.0146301	FGFR2, HSPD1	50	5	16650	133.2	1	0.142344	22.9513
GOTERM_BP_FAT	GO:0071866~negative regulation of apoptotic process in bone marrow	2	3.77358	0.0146301	FGFR2, HSPD1	50	5	16650	133.2	1	0.142344	22.9513
GOTERM_BP_FAT	GO:0001934~positive regulation of protein phosphorylation	8	15.0943	0.014719	FGFR2, PRKAR2B, JUN, PDGFD, GADD45B, SOX9, IGFBP3, PPP1R15A	50	890	16650	2.99326	1	0.142614	23.0742
GOTERM_BP_FAT	GO:0065009~regulation of molecular function	16	30.1887	0.0149041	FGFR2, NR4A2, NR4A1, PMAIP1, PRKAR2B, FOS, DUSP1, JUN, ASPH, HSPD1, PDGFD, GADD45B, IGFBP3, TFPI2, MYC, PPP1R15A	50	2863	16650	1.86098	1	0.143746	23.3294
GOTERM_BP_FAT	GO:0061035~regulation of cartilage development	3	5.66038	0.01523	EFEMP1, SNAI2, SOX9	50	64	16650	15.6094	1	0.146125	23.7769
GOTERM_BP_FAT	GO:0048762~mesenchymal cell differentiation	4	7.54717	0.0154443	FGFR2, SEMA3E, SNAI2, SOX9	50	178	16650	7.48315	1	0.14749	24.0699
GOTERM_BP_FAT	GO:0044093~positive regulation of molecular function	12	22.6415	0.0161421	FGFR2, PRKAR2B, JUN, NR4A2, PDGFD, HSPD1, ASPH, PMAIP1, GADD45B, IGFBP3, PPP1R15A, MYC	50	1840	16650	2.17174	1	0.153101	25.0162
GOTERM_BP_FAT	GO:0048699~generation of neurons	10	18.8679	0.0162501	FGFR2, IER2, BTG2, JUN, SEMA3E, NR4A2, OBSL1, SOX9, LAMB1, MYC	50	1357	16650	2.45394	1	0.153488	25.1617
GOTERM_BP_FAT	GO:0014812~muscle cell migration	3	5.66038	0.0166101	PDGFD, IGFBP3, MYC	50	67	16650	14.9104	1	0.156066	25.6448
GOTERM_BP_FAT	GO:0006468~protein phosphorylation	12	22.6415	0.0168836	FGFR2, PRKAR2B, ATF3, DUSP1, JUN, EFEMP1, PDGFD, GADD45B, SOX9, IGFBP3, PPP1R15A, MYC	50	1852	16650	2.15767	1	0.157869	26.0099
GOTERM_BP_FAT	GO:0022414~reproductive process	10	18.8679	0.0174283	FGFR2, EGR1, FOS, DUSP1, CLDN4, FOSB, SOX9, SMARCA2, MYC, JUNB	50	1373	16650	2.42535	1	0.161982	26.7316
GOTERM_BP_FAT	GO:0071839~apoptotic process in bone marrow	2	3.77358	0.0175309	FGFR2, HSPD1	50	6	16650	111	1	0.16228	26.8669
GOTERM_BP_FAT	GO:0043435~response to corticotropin-releasing hormone	2	3.77358	0.0175309	NR4A2, NR4A1	50	6	16650	111	1	0.16228	26.8669
GOTERM_BP_FAT	GO:0071376~cellular response to corticotropin-releasing hormone stimulus	2	3.77358	0.0175309	NR4A2, NR4A1	50	6	16650	111	1	0.16228	26.8669
GOTERM_BP_FAT	GO:0071503~response to heparin	2	3.77358	0.0175309	EGR1, SOX9	50	6	16650	111	1	0.16228	26.8669
GOTERM_BP_FAT	GO:0031401~positive regulation of protein modification process	9	16.9811	0.0175314	FGFR2, PRKAR2B, JUN, PDGFD, GADD45B, SNAI2, SOX9, IGFBP3, PPP1R15A	50	1143	16650	2.62205	1	0.161707	26.8676
GOTERM_BP_FAT	GO:0000003~reproduction	10	18.8679	0.0175799	FGFR2, EGR1, FOS, DUSP1, CLDN4, FOSB, SOX9, SMARCA2, MYC, JUNB	50	1375	16650	2.42182	1	0.161545	26.9314
GOTERM_BP_FAT	GO:0007565~female pregnancy	4	7.54717	0.0175964	FOS, CLDN4, FOSB, JUNB	50	187	16650	7.12299	1	0.161114	26.9531
GOTERM_BP_FAT	GO:0002682~regulation of immune system process	10	18.8679	0.0178092	HLA-DQB1, FOS, JUN, IGHD, PDGFD, HSPD1, SCARA3, CFD, SOX9, MYC	50	1378	16650	2.41655	1	0.162337	27.2325
GOTERM_BP_FAT	GO:0014032~neural crest cell development	3	5.66038	0.0180417	SEMA3E, SNAI2, SOX9	50	70	16650	14.2714	1	0.163715	27.5367
GOTERM_BP_FAT	GO:0021954~central nervous system neuron development	3	5.66038	0.0185302	FGFR2, BTG2, NR4A2	50	71	16650	14.0704	1	0.167208	28.1718
GOTERM_BP_FAT	GO:1905114~cell surface receptor signaling pathway involved in cell-cell signaling	6	11.3208	0.0189168	FGFR2, EGR1, NR4A2, SNAI2, SOX9, MYC	50	527	16650	3.79127	1	0.169821	28.6706
GOTERM_BP_FAT	GO:0035239~tube morphogenesis	5	9.43396	0.018992	FGFR2, SEMA3E, TGM2, SOX9, MYC	50	348	16650	4.78448	1	0.169855	28.7674
GOTERM_BP_FAT	GO:0010467~gene expression	24	45.283	0.0193986	EGR1, FGFR2, EFEMP1, NR4A2, MME, NR4A1, FOSB, SNAI2, SOX9, JUNB, TNNI2, FOS, ATF3, BTG2, SRSF7, JUN, MYRF, EIF1, ASPH, HSPD1, MYC, PPP1R15A, SMARCA2, BARD1	50	5306	16650	1.50622	1	0.172595	29.2878
GOTERM_BP_FAT	GO:0002764~immune response-regulating signaling pathway	6	11.3208	0.019478	HLA-DQB1, FOS, JUN, IGHD, HSPD1, SCARA3	50	531	16650	3.76271	1	0.172651	29.389
GOTERM_BP_FAT	GO:0002573~myeloid leukocyte differentiation	4	7.54717	0.0196434	FOS, JUN, MYC, JUNB	50	195	16650	6.83077	1	0.173404	29.5995
GOTERM_BP_FAT	GO:0032808~lacrimal gland development	2	3.77358	0.0204233	FGFR2, SOX9	50	7	16650	95.1429	1	0.179087	30.5836
GOTERM_BP_FAT	GO:0007167~enzyme linked receptor protein signaling pathway	8	15.0943	0.0207869	FGFR2, EGR1, FOS, JUN, EFEMP1, PDGFD, SOX9, IGFBP3	50	954	16650	2.79245	1	0.181386	31.0382
GOTERM_BP_FAT	GO:0043281~regulation of cysteine-type endopeptidase activity involved in apoptotic process	4	7.54717	0.0209872	NR4A1, HSPD1, PMAIP1, MYC	50	200	16650	6.66	1	0.182368	31.2872
GOTERM_BP_FAT	GO:0001503~ossification	5	9.43396	0.0210236	FGFR2, SNAI2, SOX9, IGFBP3, JUNB	50	359	16650	4.63788	1	0.182048	31.3324
GOTERM_BP_FAT	GO:0030900~forebrain development	5	9.43396	0.0214068	FGFR2, BTG2, NR4A2, LAMB1, MYC	50	361	16650	4.61219	1	0.184458	31.8064
GOTERM_BP_FAT	GO:0002684~positive regulation of immune system process	8	15.0943	0.0214343	HLA-DQB1, FOS, JUN, IGHD, PDGFD, HSPD1, SCARA3, CFD	50	960	16650	2.775	1	0.184064	31.8403
GOTERM_BP_FAT	GO:0007049~cell cycle	11	20.7547	0.0219016	FGFR2, PRKAR2B, DUSP1, BTG2, OBSL1, NR4A1, NDRG1, SOX9, PPP1R15A, MYC, BARD1	50	1672	16650	2.19079	1	0.187098	32.4138
GOTERM_BP_FAT	GO:0009967~positive regulation of signal transduction	10	18.8679	0.021965	FGFR2, ATF3, JUN, TGM2, PDGFD, ASPH, PMAIP1, GADD45B, SOX9, IGFBP3	50	1428	16650	2.33193	1	0.186977	32.4913
GOTERM_BP_FAT	GO:0014033~neural crest cell differentiation	3	5.66038	0.0221036	SEMA3E, SNAI2, SOX9	50	78	16650	12.8077	1	0.187437	32.6603
GOTERM_BP_FAT	GO:0051240~positive regulation of multicellular organismal process	10	18.8679	0.0222351	FGFR2, EGR1, FOS, JUN, MYRF, OBSL1, PDGFD, HSPD1, SOX9, MYC	50	1431	16650	2.32704	1	0.187839	32.8203
GOTERM_BP_FAT	GO:0000904~cell morphogenesis involved in differentiation	7	13.2075	0.0224262	FGFR2, SEMA3E, NR4A2, OBSL1, SNAI2, SOX9, LAMB1	50	753	16650	3.09562	1	0.188694	33.0522
GOTERM_BP_FAT	GO:0030916~otic vesicle formation	2	3.77358	0.0233073	FGFR2, SOX9	50	8	16650	83.25	1	0.194784	34.1117
GOTERM_BP_FAT	GO:0007155~cell adhesion	11	20.7547	0.0242085	HLA-DQB1, EGR1, LAMB4, CLDN4, SEMA3E, TGM2, NDRG1, HSPD1, SNAI2, SOX9, LAMB1	50	1699	16650	2.15597	1	0.200941	35.179
GOTERM_BP_FAT	GO:0071560~cellular response to transforming growth factor beta stimulus	4	7.54717	0.0247132	FOS, JUN, PDGFD, SOX9	50	213	16650	6.25352	1	0.204068	35.7696
GOTERM_BP_FAT	GO:0022610~biological adhesion	11	20.7547	0.0247445	HLA-DQB1, EGR1, LAMB4, CLDN4, SEMA3E, TGM2, NDRG1, HSPD1, SNAI2, SOX9, LAMB1	50	1705	16650	2.14839	1	0.203656	35.8061
GOTERM_BP_FAT	GO:0009887~organ morphogenesis	8	15.0943	0.0251285	FGFR2, JUN, EFEMP1, TGM2, SNAI2, SOX9, LAMB1, MYC	50	992	16650	2.68548	1	0.205852	36.2518
GOTERM_BP_FAT	GO:0071559~response to transforming growth factor beta	4	7.54717	0.0253162	FOS, JUN, PDGFD, SOX9	50	215	16650	6.19535	1	0.206587	36.4686
GOTERM_BP_FAT	GO:0044706~multi-multicellular organism process	4	7.54717	0.0253162	FOS, CLDN4, FOSB, JUNB	50	215	16650	6.19535	1	0.206587	36.4686
GOTERM_BP_FAT	GO:0030182~neuron differentiation	9	16.9811	0.0255567	FGFR2, IER2, BTG2, JUN, SEMA3E, NR4A2, OBSL1, SOX9, LAMB1	50	1226	16650	2.44454	1	0.207703	36.7453
GOTERM_BP_FAT	GO:0090193~positive regulation of glomerulus development	2	3.77358	0.026183	EGR1, PDGFD	50	9	16650	74	1	0.211614	37.4607
GOTERM_BP_FAT	GO:0072124~regulation of glomerular mesangial cell proliferation	2	3.77358	0.026183	EGR1, PDGFD	50	9	16650	74	1	0.211614	37.4607
GOTERM_BP_FAT	GO:2000794~regulation of epithelial cell proliferation involved in lung morphogenesis	2	3.77358	0.026183	FGFR2, SOX9	50	9	16650	74	1	0.211614	37.4607
GOTERM_BP_FAT	GO:0072110~glomerular mesangial cell proliferation	2	3.77358	0.026183	EGR1, PDGFD	50	9	16650	74	1	0.211614	37.4607
GOTERM_BP_FAT	GO:0007611~learning or memory	4	7.54717	0.0268586	PRKAR2B, FOS, BTG2, JUN	50	220	16650	6.05455	1	0.215835	38.2238
GOTERM_BP_FAT	GO:0071347~cellular response to interleukin-1	3	5.66038	0.0276584	EGR1, SOX9, MYC	50	88	16650	11.3523	1	0.220894	39.1159
GOTERM_BP_FAT	GO:0097190~apoptotic signaling pathway	6	11.3208	0.0277973	ATF3, JUN, NR4A2, PMAIP1, SNAI2, PPP1R15A	50	583	16650	3.4271	1	0.221209	39.2696
GOTERM_BP_FAT	GO:0001656~metanephros development	3	5.66038	0.0282419	EGR1, SOX9, MYC	50	89	16650	11.2247	1	0.223681	39.759
GOTERM_BP_FAT	GO:0044708~single-organism behavior	5	9.43396	0.0285886	PRKAR2B, FOS, BTG2, JUN, NR4A2	50	395	16650	4.21519	1	0.225444	40.1381
GOTERM_BP_FAT	GO:0072203~cell proliferation involved in metanephros development	2	3.77358	0.0290505	EGR1, MYC	50	10	16650	66.6	1	0.227995	40.6397
GOTERM_BP_FAT	GO:0060174~limb bud formation	2	3.77358	0.0290505	FGFR2, SOX9	50	10	16650	66.6	1	0.227995	40.6397
GOTERM_BP_FAT	GO:0097201~negative regulation of transcription from RNA polymerase II promoter in response to stress	2	3.77358	0.0290505	JUN, PPP1R15A	50	10	16650	66.6	1	0.227995	40.6397
GOTERM_BP_FAT	GO:0071600~otic vesicle morphogenesis	2	3.77358	0.0290505	FGFR2, SOX9	50	10	16650	66.6	1	0.227995	40.6397
GOTERM_BP_FAT	GO:0003008~system process	12	22.6415	0.0296322	FAM134B, PRKAR2B, FOS, BTG2, JUN, EFEMP1, MYRF, MME, ASPH, SNAI2, SOX9, TNNI2	50	2014	16650	1.98411	1	0.231354	41.2657
GOTERM_BP_FAT	GO:0002062~chondrocyte differentiation	3	5.66038	0.0300219	EFEMP1, SNAI2, SOX9	50	92	16650	10.8587	1	0.233354	41.6816
GOTERM_BP_FAT	GO:0003007~heart morphogenesis	4	7.54717	0.0300919	FGFR2, JUN, SNAI2, SOX9	50	230	16650	5.7913	1	0.233144	41.756
GOTERM_BP_FAT	GO:0006974~cellular response to DNA damage stimulus	7	13.2075	0.0302038	BTG2, NDRG1, PMAIP1, SNAI2, PPP1R15A, MYC, BARD1	50	807	16650	2.88848	1	0.233223	41.8747
GOTERM_BP_FAT	GO:0006352~DNA-templated transcription, initiation	4	7.54717	0.0304261	JUN, NR4A2, NR4A1, MYC	50	231	16650	5.76623	1	0.234054	42.11
GOTERM_BP_FAT	GO:0006952~defense response	10	18.8679	0.0311667	HLA-DQB1, EGR1, FOS, IGHD, TGM2, HSPD1, SCARA3, PMAIP1, CFD, MYC	50	1518	16650	2.19368	1	0.23839	42.8874
GOTERM_BP_FAT	GO:0009791~post-embryonic development	3	5.66038	0.0312329	FGFR2, EFEMP1, NR4A2	50	94	16650	10.6277	1	0.238143	42.9563
GOTERM_BP_FAT	GO:0031175~neuron projection development	7	13.2075	0.0318182	FGFR2, BTG2, JUN, SEMA3E, NR4A2, OBSL1, LAMB1	50	817	16650	2.85312	1	0.241378	43.5629
GOTERM_BP_FAT	GO:0002520~immune system development	7	13.2075	0.0324796	FGFR2, EGR1, FOS, JUN, HSPD1, MYC, JUNB	50	821	16650	2.83922	1	0.245087	44.2412
GOTERM_BP_FAT	GO:0050877~neurological system process	9	16.9811	0.0330505	FAM134B, PRKAR2B, FOS, BTG2, JUN, EFEMP1, MYRF, MME, SNAI2	50	1288	16650	2.32686	1	0.24816	44.8203
GOTERM_BP_FAT	GO:0001657~ureteric bud development	3	5.66038	0.0330853	FGFR2, SOX9, MYC	50	97	16650	10.299	1	0.247681	44.8555
GOTERM_BP_FAT	GO:0072164~mesonephric tubule development	3	5.66038	0.0337122	FGFR2, SOX9, MYC	50	98	16650	10.1939	1	0.251082	45.4846
GOTERM_BP_FAT	GO:0072163~mesonephric epithelium development	3	5.66038	0.0337122	FGFR2, SOX9, MYC	50	98	16650	10.1939	1	0.251082	45.4846
GOTERM_BP_FAT	GO:0060828~regulation of canonical Wnt signaling pathway	4	7.54717	0.0338766	FGFR2, EGR1, SNAI2, SOX9	50	241	16650	5.52697	1	0.251443	45.6484
GOTERM_BP_FAT	GO:0043217~myelin maintenance	2	3.77358	0.0347606	MYRF, NDRG1	50	12	16650	55.5	1	0.256457	46.5215
GOTERM_BP_FAT	GO:0060736~prostate gland growth	2	3.77358	0.0347606	FGFR2, SOX9	50	12	16650	55.5	1	0.256457	46.5215
GOTERM_BP_FAT	GO:0048732~gland development	5	9.43396	0.034948	FGFR2, JUN, TGM2, SOX9, MYC	50	421	16650	3.95487	1	0.256945	46.7049
GOTERM_BP_FAT	GO:0016070~RNA metabolic process	21	39.6226	0.034981	EGR1, FGFR2, EFEMP1, NR4A2, NR4A1, FOSB, SNAI2, SOX9, JUNB, TNNI2, FOS, ATF3, BTG2, SRSF7, JUN, MYRF, ASPH, MYC, PPP1R15A, SMARCA2, BARD1	50	4648	16650	1.50452	1	0.25644	46.7372
GOTERM_BP_FAT	GO:0045087~innate immune response	7	13.2075	0.0350408	HLA-DQB1, EGR1, IGHD, HSPD1, SCARA3, CFD, MYC	50	836	16650	2.78828	1	0.256108	46.7955
GOTERM_BP_FAT	GO:0048729~tissue morphogenesis	6	11.3208	0.0353418	FGFR2, SEMA3E, TGM2, SNAI2, SOX9, MYC	50	622	16650	3.21222	1	0.257317	47.0883
GOTERM_BP_FAT	GO:0010647~positive regulation of cell communication	10	18.8679	0.0356482	FGFR2, ATF3, JUN, TGM2, PDGFD, ASPH, PMAIP1, GADD45B, SOX9, IGFBP3	50	1555	16650	2.14148	1	0.258549	47.3848
GOTERM_BP_FAT	GO:0021761~limbic system development	3	5.66038	0.0362661	FGFR2, BTG2, MYC	50	102	16650	9.79412	1	0.261736	47.9781
GOTERM_BP_FAT	GO:0023056~positive regulation of signaling	10	18.8679	0.0366737	FGFR2, ATF3, JUN, TGM2, PDGFD, ASPH, PMAIP1, GADD45B, SOX9, IGFBP3	50	1563	16650	2.13052	1	0.263575	48.366
GOTERM_BP_FAT	GO:0001823~mesonephros development	3	5.66038	0.0369161	FGFR2, SOX9, MYC	50	103	16650	9.69903	1	0.264369	48.5953
GOTERM_BP_FAT	GO:0001837~epithelial to mesenchymal transition	3	5.66038	0.0375705	FGFR2, SNAI2, SOX9	50	104	16650	9.60577	1	0.267713	49.2097
GOTERM_BP_FAT	GO:0071243~cellular response to arsenic-containing substance	2	3.77358	0.0376033	ATF3, MYC	50	13	16650	51.2308	1	0.267193	49.2403
GOTERM_BP_FAT	GO:2000027~regulation of organ morphogenesis	4	7.54717	0.0378985	FGFR2, SNAI2, SOX9, MYC	50	252	16650	5.28571	1	0.268292	49.5152
GOTERM_BP_FAT	GO:0050890~cognition	4	7.54717	0.0382759	PRKAR2B, FOS, BTG2, JUN	50	253	16650	5.26482	1	0.269885	49.8643
GOTERM_BP_FAT	GO:0032526~response to retinoic acid	3	5.66038	0.0388927	DUSP1, SOX9, MYC	50	106	16650	9.42453	1	0.272922	50.4301
GOTERM_BP_FAT	GO:0030155~regulation of cell adhesion	6	11.3208	0.0398873	HLA-DQB1, SEMA3E, TGM2, HSPD1, SNAI2, SOX9	50	643	16650	3.10731	1	0.278208	51.3298
GOTERM_BP_FAT	GO:0051336~regulation of hydrolase activity	9	16.9811	0.0399634	FGFR2, JUN, NR4A1, HSPD1, ASPH, PMAIP1, PPP1R15A, MYC, TFPI2	50	1337	16650	2.24159	1	0.277932	51.3981
GOTERM_BP_FAT	GO:0072216~positive regulation of metanephros development	2	3.77358	0.0404377	EGR1, MYC	50	14	16650	47.5714	1	0.280039	51.8211
GOTERM_BP_FAT	GO:0072109~glomerular mesangium development	2	3.77358	0.0404377	EGR1, PDGFD	50	14	16650	47.5714	1	0.280039	51.8211
GOTERM_BP_FAT	GO:0090192~regulation of glomerulus development	2	3.77358	0.0404377	EGR1, PDGFD	50	14	16650	47.5714	1	0.280039	51.8211
GOTERM_BP_FAT	GO:0006464~cellular protein modification process	18	33.9623	0.0410356	EGR1, FGFR2, EFEMP1, SNAI2, SOX9, PRKAR2B, ATF3, BTG2, DUSP1, JUN, TGM2, ASPH, PDGFD, GADD45B, IGFBP3, MYC, PPP1R15A, BARD1	50	3818	16650	1.56993	1	0.282862	52.3494
GOTERM_BP_FAT	GO:0036211~protein modification process	18	33.9623	0.0410356	EGR1, FGFR2, EFEMP1, SNAI2, SOX9, PRKAR2B, ATF3, BTG2, DUSP1, JUN, TGM2, ASPH, PDGFD, GADD45B, IGFBP3, MYC, PPP1R15A, BARD1	50	3818	16650	1.56993	1	0.282862	52.3494
GOTERM_BP_FAT	GO:0030522~intracellular receptor signaling pathway	4	7.54717	0.0413641	NR4A2, CYP26A1, NR4A1, SNAI2	50	261	16650	5.10345	1	0.284068	52.6373
GOTERM_BP_FAT	GO:0009607~response to biotic stimulus	7	13.2075	0.0419137	FOS, JUN, IGHD, HSPD1, PMAIP1, MYC, JUNB	50	873	16650	2.6701	1	0.286566	53.1154
GOTERM_BP_FAT	GO:0071599~otic vesicle development	2	3.77358	0.0432641	FGFR2, SOX9	50	15	16650	44.4	1	0.293702	54.2708
GOTERM_BP_FAT	GO:0002761~regulation of myeloid leukocyte differentiation	3	5.66038	0.043658	FOS, JUN, MYC	50	113	16650	8.84071	1	0.295229	54.6027
GOTERM_BP_FAT	GO:0070555~response to interleukin-1	3	5.66038	0.0443558	EGR1, SOX9, MYC	50	114	16650	8.76316	1	0.298489	55.1852
GOTERM_BP_FAT	GO:0034976~response to endoplasmic reticulum stress	4	7.54717	0.0445753	ATF3, JUN, PMAIP1, PPP1R15A	50	269	16650	4.95167	1	0.298989	55.367
GOTERM_BP_FAT	GO:0009267~cellular response to starvation	3	5.66038	0.0450578	ATF3, JUN, PMAIP1	50	115	16650	8.68696	1	0.300981	55.764
GOTERM_BP_FAT	GO:0022612~gland morphogenesis	3	5.66038	0.0450578	FGFR2, TGM2, SOX9	50	115	16650	8.68696	1	0.300981	55.764
GOTERM_BP_FAT	GO:0045655~regulation of monocyte differentiation	2	3.77358	0.0460822	JUN, MYC	50	16	16650	41.625	1	0.306017	56.5961
GOTERM_BP_FAT	GO:0090231~regulation of spindle checkpoint	2	3.77358	0.0460822	DUSP1, NDRG1	50	16	16650	41.625	1	0.306017	56.5961
GOTERM_BP_FAT	GO:0050680~negative regulation of epithelial cell proliferation	3	5.66038	0.0471885	FGFR2, SNAI2, SOX9	50	118	16650	8.4661	1	0.311448	57.478
GOTERM_BP_FAT	GO:0001704~formation of primary germ layer	3	5.66038	0.0471885	FGFR2, DUSP1, LAMB1	50	118	16650	8.4661	1	0.311448	57.478
GOTERM_BP_FAT	GO:0033365~protein localization to organelle	7	13.2075	0.0478663	SYNE2, JUN, OBSL1, PMAIP1, SNAI2, SOX9, PPP1R15A	50	902	16650	2.58426	1	0.314442	58.01
GOTERM_BP_FAT	GO:0043280~positive regulation of cysteine-type endopeptidase activity involved in apoptotic process	3	5.66038	0.0479069	HSPD1, PMAIP1, MYC	50	119	16650	8.39496	1	0.313891	58.0416
GOTERM_BP_FAT	GO:0008637~apoptotic mitochondrial changes	3	5.66038	0.0479069	JUN, HSPD1, PMAIP1	50	119	16650	8.39496	1	0.313891	58.0416
GOTERM_BP_FAT	GO:0007417~central nervous system development	7	13.2075	0.0482955	FGFR2, BTG2, MYRF, NR4A2, SOX9, LAMB1, MYC	50	904	16650	2.57854	1	0.315261	58.3436
GOTERM_BP_FAT	GO:0001101~response to acid chemical	4	7.54717	0.0483333	DUSP1, PDGFD, SOX9, MYC	50	278	16650	4.79137	1	0.314696	58.3729
GOTERM_BP_FAT	GO:0060602~branch elongation of an epithelium	2	3.77358	0.0488922	FGFR2, SOX9	50	17	16650	39.1765	1	0.316986	58.8033
GOTERM_BP_FAT	GO:1902043~positive regulation of extrinsic apoptotic signaling pathway via death domain receptors	2	3.77358	0.0488922	ATF3, PMAIP1	50	17	16650	39.1765	1	0.316986	58.8033
GOTERM_BP_FAT	GO:0050776~regulation of immune response	7	13.2075	0.0500364	HLA-DQB1, FOS, JUN, IGHD, HSPD1, SCARA3, CFD	50	912	16650	2.55592	1	0.322428	59.6712
GOTERM_BP_FAT	GO:0002521~leukocyte differentiation	5	9.43396	0.0502896	EGR1, FOS, JUN, MYC, JUNB	50	474	16650	3.51266	1	0.323015	59.861
GOTERM_BP_FAT	GO:0051345~positive regulation of hydrolase activity	7	13.2075	0.0511441	FGFR2, JUN, HSPD1, ASPH, PMAIP1, PPP1R15A, MYC	50	917	16650	2.54198	1	0.326822	60.4951
GOTERM_BP_FAT	GO:0036120~cellular response to platelet-derived growth factor stimulus	2	3.77358	0.0516942	PDGFD, MYC	50	18	16650	37	1	0.328971	60.8983
GOTERM_BP_FAT	GO:2000241~regulation of reproductive process	3	5.66038	0.0530467	FGFR2, DUSP1, SOX9	50	126	16650	7.92857	1	0.335336	61.8733
GOTERM_BP_FAT	GO:0043410~positive regulation of MAPK cascade	5	9.43396	0.0538751	FGFR2, JUN, PDGFD, GADD45B, IGFBP3	50	485	16650	3.43299	1	0.338881	62.4591
GOTERM_BP_FAT	GO:0035994~response to muscle stretch	2	3.77358	0.054488	FOS, JUN	50	19	16650	35.0526	1	0.341273	62.887
GOTERM_BP_FAT	GO:0036119~response to platelet-derived growth factor	2	3.77358	0.054488	PDGFD, MYC	50	19	16650	35.0526	1	0.341273	62.887
GOTERM_BP_FAT	GO:0044703~multi-organism reproductive process	7	13.2075	0.0554928	FOS, CLDN4, FOSB, SOX9, SMARCA2, MYC, JUNB	50	936	16650	2.49038	1	0.345665	63.5786
GOTERM_BP_FAT	GO:0071345~cellular response to cytokine stimulus	6	11.3208	0.0556107	HLA-DQB1, EGR1, TGM2, MME, SOX9, MYC	50	706	16650	2.83003	1	0.345468	63.6589
GOTERM_BP_FAT	GO:0071375~cellular response to peptide hormone stimulus	4	7.54717	0.055845	PRKAR2B, NR4A2, NR4A1, MYC	50	295	16650	4.51525	1	0.345867	63.818
GOTERM_BP_FAT	GO:0048514~blood vessel morphogenesis	5	9.43396	0.0558888	FGFR2, JUN, SEMA3E, NR4A1, JUNB	50	491	16650	3.39104	1	0.345293	63.8477
GOTERM_BP_FAT	GO:0016310~phosphorylation	12	22.6415	0.055954	FGFR2, PRKAR2B, ATF3, DUSP1, JUN, EFEMP1, PDGFD, GADD45B, SOX9, IGFBP3, PPP1R15A, MYC	50	2229	16650	1.79273	1	0.34483	63.8919
GOTERM_BP_FAT	GO:0001889~liver development	3	5.66038	0.0560687	JUN, SOX9, MYC	50	130	16650	7.68462	1	0.344622	63.9694
GOTERM_BP_FAT	GO:0030162~regulation of proteolysis	6	11.3208	0.0561618	NR4A1, HSPD1, ASPH, PMAIP1, MYC, TFPI2	50	708	16650	2.82203	1	0.344305	64.0322
GOTERM_BP_FAT	GO:1902895~positive regulation of pri-miRNA transcription from RNA polymerase II promoter	2	3.77358	0.0572738	FOS, JUN	50	20	16650	33.3	1	0.349129	64.7746
GOTERM_BP_FAT	GO:0060445~branching involved in salivary gland morphogenesis	2	3.77358	0.0572738	FGFR2, TGM2	50	20	16650	33.3	1	0.349129	64.7746
GOTERM_BP_FAT	GO:0071456~cellular response to hypoxia	3	5.66038	0.0576021	EGR1, NDRG1, PMAIP1	50	132	16650	7.56818	1	0.349982	64.991
GOTERM_BP_FAT	GO:0051302~regulation of cell division	3	5.66038	0.0583743	FGFR2, PDGFD, MYC	50	133	16650	7.51128	1	0.353042	65.495
GOTERM_BP_FAT	GO:1903311~regulation of mRNA metabolic process	3	5.66038	0.0583743	BTG2, SRSF7, BARD1	50	133	16650	7.51128	1	0.353042	65.495
GOTERM_BP_FAT	GO:0061008~hepaticobiliary system development	3	5.66038	0.0583743	JUN, SOX9, MYC	50	133	16650	7.51128	1	0.353042	65.495
GOTERM_BP_FAT	GO:0032496~response to lipopolysaccharide	4	7.54717	0.0590921	FOS, JUN, HSPD1, JUNB	50	302	16650	4.4106	1	0.355804	65.9574
GOTERM_BP_FAT	GO:0009790~embryo development	7	13.2075	0.059817	FGFR2, DUSP1, EFEMP1, SOX9, LAMB1, MYC, JUNB	50	954	16650	2.4434	1	0.358578	66.4184
GOTERM_BP_FAT	GO:0036499~PERK-mediated unfolded protein response	2	3.77358	0.0600515	ATF3, PPP1R15A	50	21	16650	31.7143	1	0.358928	66.5663
GOTERM_BP_FAT	GO:0051412~response to corticosterone	2	3.77358	0.0600515	FOS, FOSB	50	21	16650	31.7143	1	0.358928	66.5663
GOTERM_BP_FAT	GO:0071396~cellular response to lipid	5	9.43396	0.0621739	NR4A2, NR4A1, SNAI2, SOX9, MYC	50	509	16650	3.27112	1	0.368436	67.877
GOTERM_BP_FAT	GO:0060562~epithelial tube morphogenesis	4	7.54717	0.0624274	FGFR2, SEMA3E, SOX9, MYC	50	309	16650	4.31068	1	0.368846	68.0302
GOTERM_BP_FAT	GO:0048666~neuron development	7	13.2075	0.062558	FGFR2, BTG2, JUN, SEMA3E, NR4A2, OBSL1, LAMB1	50	965	16650	2.41554	1	0.368665	68.1089
GOTERM_BP_FAT	GO:0007507~heart development	5	9.43396	0.0628948	FGFR2, JUN, OBSL1, SNAI2, SOX9	50	511	16650	3.25832	1	0.369471	68.311
GOTERM_BP_FAT	GO:0036294~cellular response to decreased oxygen levels	3	5.66038	0.0630829	EGR1, NDRG1, PMAIP1	50	139	16650	7.18705	1	0.369564	68.4234
GOTERM_BP_FAT	GO:0048511~rhythmic process	4	7.54717	0.0638834	EGR1, CLDN4, JUN, MYC	50	312	16650	4.26923	1	0.37256	68.8973
GOTERM_BP_FAT	GO:0030097~hemopoiesis	6	11.3208	0.0651129	FGFR2, EGR1, FOS, JUN, MYC, JUNB	50	739	16650	2.70365	1	0.377543	69.612
GOTERM_BP_FAT	GO:1901653~cellular response to peptide	4	7.54717	0.0653554	PRKAR2B, NR4A2, NR4A1, MYC	50	315	16650	4.22857	1	0.377869	69.7512
GOTERM_BP_FAT	GO:0014066~regulation of phosphatidylinositol 3-kinase signaling	3	5.66038	0.0654845	FGFR2, PDGFD, SOX9	50	142	16650	7.03521	1	0.377664	69.825
GOTERM_BP_FAT	GO:0072012~glomerulus vasculature development	2	3.77358	0.0655829	EGR1, PDGFD	50	23	16650	28.9565	1	0.377317	69.8812
GOTERM_BP_FAT	GO:0072215~regulation of metanephros development	2	3.77358	0.0655829	EGR1, MYC	50	23	16650	28.9565	1	0.377317	69.8812
GOTERM_BP_FAT	GO:0030111~regulation of Wnt signaling pathway	4	7.54717	0.0658496	FGFR2, EGR1, SNAI2, SOX9	50	316	16650	4.21519	1	0.377753	70.0329
GOTERM_BP_FAT	GO:0002237~response to molecule of bacterial origin	4	7.54717	0.0658496	FOS, JUN, HSPD1, JUNB	50	316	16650	4.21519	1	0.377753	70.0329
GOTERM_BP_FAT	GO:0072073~kidney epithelium development	3	5.66038	0.0662919	FGFR2, SOX9, MYC	50	143	16650	6.98601	1	0.378999	70.2829
GOTERM_BP_FAT	GO:0048871~multicellular organismal homeostasis	4	7.54717	0.0663455	PRKAR2B, CLDN4, SOX9, BARD1	50	317	16650	4.20189	1	0.378446	70.3131
GOTERM_BP_FAT	GO:0002009~morphogenesis of an epithelium	5	9.43396	0.066566	FGFR2, SEMA3E, TGM2, SOX9, MYC	50	521	16650	3.19578	1	0.378663	70.4369
GOTERM_BP_FAT	GO:0045321~leukocyte activation	6	11.3208	0.0675479	HLA-DQB1, EGR1, JUN, IGHD, NDRG1, HSPD1	50	747	16650	2.6747	1	0.382363	70.9822
GOTERM_BP_FAT	GO:0002274~myeloid leukocyte activation	3	5.66038	0.0695548	JUN, NDRG1, HSPD1	50	147	16650	6.79592	1	0.390653	72.0675
GOTERM_BP_FAT	GO:0006259~DNA metabolic process	7	13.2075	0.0704142	FOS, DUSP1, BTG2, JUN, HSPD1, MYC, BARD1	50	995	16650	2.34271	1	0.393697	72.5204
GOTERM_BP_FAT	GO:0061440~kidney vasculature development	2	3.77358	0.0710824	EGR1, PDGFD	50	25	16650	26.64	1	0.395864	72.8678
GOTERM_BP_FAT	GO:0061437~renal system vasculature development	2	3.77358	0.0710824	EGR1, PDGFD	50	25	16650	26.64	1	0.395864	72.8678
GOTERM_BP_FAT	GO:0060740~prostate gland epithelium morphogenesis	2	3.77358	0.0710824	FGFR2, SOX9	50	25	16650	26.64	1	0.395864	72.8678
GOTERM_BP_FAT	GO:0071453~cellular response to oxygen levels	3	5.66038	0.0712059	EGR1, NDRG1, PMAIP1	50	149	16650	6.7047	1	0.395602	72.9315
GOTERM_BP_FAT	GO:0043409~negative regulation of MAPK cascade	3	5.66038	0.0712059	ATF3, DUSP1, MYC	50	149	16650	6.7047	1	0.395602	72.9315
GOTERM_BP_FAT	GO:0009896~positive regulation of catabolic process	4	7.54717	0.0745143	BTG2, SOX9, MYC, BARD1	50	333	16650	4	1	0.409299	74.5875
GOTERM_BP_FAT	GO:0042594~response to starvation	3	5.66038	0.0745467	ATF3, JUN, PMAIP1	50	153	16650	6.52941	1	0.408616	74.6032
GOTERM_BP_FAT	GO:0009617~response to bacterium	5	9.43396	0.0754298	FOS, JUN, IGHD, HSPD1, JUNB	50	544	16650	3.06066	1	0.411607	75.0286
GOTERM_BP_FAT	GO:0060512~prostate gland morphogenesis	2	3.77358	0.0765503	FGFR2, SOX9	50	27	16650	24.6667	1	0.415585	75.5585
GOTERM_BP_FAT	GO:0046685~response to arsenic-containing substance	2	3.77358	0.0765503	ATF3, MYC	50	27	16650	24.6667	1	0.415585	75.5585
GOTERM_BP_FAT	GO:0048534~hematopoietic or lymphoid organ development	6	11.3208	0.0774653	FGFR2, EGR1, FOS, JUN, MYC, JUNB	50	778	16650	2.56812	1	0.41865	75.9835
GOTERM_BP_FAT	GO:0045787~positive regulation of cell cycle	4	7.54717	0.0776892	FGFR2, BTG2, NDRG1, MYC	50	339	16650	3.9292	1	0.418772	76.0864
GOTERM_BP_FAT	GO:0002253~activation of immune response	5	9.43396	0.0778373	HLA-DQB1, IGHD, HSPD1, SCARA3, CFD	50	550	16650	3.02727	1	0.418572	76.1542
GOTERM_BP_FAT	GO:2001020~regulation of response to DNA damage stimulus	3	5.66038	0.0787925	PMAIP1, SNAI2, MYC	50	158	16650	6.32278	1	0.421765	76.5874
GOTERM_BP_FAT	GO:0043516~regulation of DNA damage response, signal transduction by p53 class mediator	2	3.77358	0.0792723	PMAIP1, SNAI2	50	28	16650	23.7857	1	0.422946	76.8022
GOTERM_BP_FAT	GO:0030099~myeloid cell differentiation	4	7.54717	0.0798389	FOS, JUN, MYC, JUNB	50	343	16650	3.88338	1	0.424481	77.0535
GOTERM_BP_FAT	GO:0080134~regulation of response to stress	8	15.0943	0.0805882	TGM2, HSPD1, SCARA3, PMAIP1, GADD45B, SNAI2, PPP1R15A, MYC	50	1285	16650	2.07315	1	0.42676	77.3818
GOTERM_BP_FAT	GO:0007610~behavior	5	9.43396	0.0806951	PRKAR2B, FOS, BTG2, JUN, NR4A2	50	557	16650	2.98923	1	0.426378	77.4283
GOTERM_BP_FAT	GO:2001236~regulation of extrinsic apoptotic signaling pathway	3	5.66038	0.0813762	ATF3, PMAIP1, SNAI2	50	161	16650	6.20497	1	0.428356	77.7223
GOTERM_BP_FAT	GO:0006955~immune response	9	16.9811	0.0814741	HLA-DQB1, EGR1, FOS, JUN, IGHD, HSPD1, SCARA3, CFD, MYC	50	1551	16650	1.9323	1	0.427936	77.7643
GOTERM_BP_FAT	GO:0003401~axis elongation	2	3.77358	0.0819865	FGFR2, SOX9	50	29	16650	22.9655	1	0.429211	77.9827
GOTERM_BP_FAT	GO:0007219~Notch signaling pathway	3	5.66038	0.0822432	SNAI2, SOX9, MYC	50	162	16650	6.16667	1	0.429438	78.0914
GOTERM_BP_FAT	GO:1901796~regulation of signal transduction by p53 class mediator	3	5.66038	0.0831132	PMAIP1, SNAI2, BARD1	50	163	16650	6.12883	1	0.432146	78.4559
GOTERM_BP_FAT	GO:0030224~monocyte differentiation	2	3.77358	0.0846929	JUN, MYC	50	30	16650	22.2	1	0.437673	79.1032
GOTERM_BP_FAT	GO:0060441~epithelial tube branching involved in lung morphogenesis	2	3.77358	0.0846929	FGFR2, SOX9	50	30	16650	22.2	1	0.437673	79.1032
GOTERM_BP_FAT	GO:0003203~endocardial cushion morphogenesis	2	3.77358	0.0846929	SNAI2, SOX9	50	30	16650	22.2	1	0.437673	79.1032
GOTERM_BP_FAT	GO:0090090~negative regulation of canonical Wnt signaling pathway	3	5.66038	0.0848618	EGR1, SNAI2, SOX9	50	165	16650	6.05455	1	0.437526	79.1713
GOTERM_BP_FAT	GO:0071229~cellular response to acid chemical	3	5.66038	0.0857404	PDGFD, SOX9, MYC	50	166	16650	6.01807	1	0.440199	79.5222
GOTERM_BP_FAT	GO:0051147~regulation of muscle cell differentiation	3	5.66038	0.0857404	FGFR2, SOX9, IGFBP3	50	166	16650	6.01807	1	0.440199	79.5222
GOTERM_BP_FAT	GO:0006338~chromatin remodeling	3	5.66038	0.0857404	SOX9, SMARCA2, MYC	50	166	16650	6.01807	1	0.440199	79.5222
GOTERM_BP_FAT	GO:0048598~embryonic morphogenesis	5	9.43396	0.0865677	FGFR2, DUSP1, EFEMP1, SOX9, LAMB1	50	571	16650	2.91594	1	0.442648	79.8476
GOTERM_BP_FAT	GO:0014911~positive regulation of smooth muscle cell migration	2	3.77358	0.0873915	PDGFD, MYC	50	31	16650	21.4839	1	0.445062	80.1667
GOTERM_BP_FAT	GO:0050686~negative regulation of mRNA processing	2	3.77358	0.0873915	SRSF7, BARD1	50	31	16650	21.4839	1	0.445062	80.1667
GOTERM_BP_FAT	GO:0051385~response to mineralocorticoid	2	3.77358	0.0873915	FOS, FOSB	50	31	16650	21.4839	1	0.445062	80.1667
GOTERM_BP_FAT	GO:0045862~positive regulation of proteolysis	4	7.54717	0.088131	HSPD1, ASPH, PMAIP1, MYC	50	358	16650	3.72067	1	0.447129	80.4491
GOTERM_BP_FAT	GO:0060429~epithelium development	7	13.2075	0.0893476	FGFR2, JUN, SEMA3E, TGM2, SNAI2, SOX9, MYC	50	1060	16650	2.19906	1	0.451026	80.9055
GOTERM_BP_FAT	GO:0048147~negative regulation of fibroblast proliferation	2	3.77358	0.0900822	PMAIP1, MYC	50	32	16650	20.8125	1	0.453033	81.1762
GOTERM_BP_FAT	GO:0016064~immunoglobulin mediated immune response	3	5.66038	0.0901747	HLA-DQB1, IGHD, HSPD1	50	171	16650	5.84211	1	0.452566	81.21
GOTERM_BP_FAT	GO:0042692~muscle cell differentiation	4	7.54717	0.0904024	FGFR2, OBSL1, SOX9, IGFBP3	50	362	16650	3.67956	1	0.452619	81.293
GOTERM_BP_FAT	GO:0035295~tube development	5	9.43396	0.0904521	FGFR2, SEMA3E, TGM2, SOX9, MYC	50	580	16650	2.87069	1	0.451992	81.3111
GOTERM_BP_FAT	GO:0080135~regulation of cellular response to stress	5	9.43396	0.0908889	PMAIP1, GADD45B, SNAI2, PPP1R15A, MYC	50	581	16650	2.86575	1	0.452843	81.4692
GOTERM_BP_FAT	GO:0034504~protein localization to nucleus	4	7.54717	0.0909742	SYNE2, JUN, SNAI2, SOX9	50	363	16650	3.66942	1	0.452354	81.4999
GOTERM_BP_FAT	GO:0006986~response to unfolded protein	3	5.66038	0.0910697	ATF3, HSPD1, PPP1R15A	50	172	16650	5.80814	1	0.451906	81.5343
GOTERM_BP_FAT	GO:0007369~gastrulation	3	5.66038	0.0910697	FGFR2, DUSP1, LAMB1	50	172	16650	5.80814	1	0.451906	81.5343
GOTERM_BP_FAT	GO:0006109~regulation of carbohydrate metabolic process	3	5.66038	0.0919674	PMAIP1, IGFBP3, MYC	50	173	16650	5.77457	1	0.454495	81.8543
GOTERM_BP_FAT	GO:0021953~central nervous system neuron differentiation	3	5.66038	0.0919674	FGFR2, BTG2, NR4A2	50	173	16650	5.77457	1	0.454495	81.8543
GOTERM_BP_FAT	GO:0019724~B cell mediated immunity	3	5.66038	0.0919674	HLA-DQB1, IGHD, HSPD1	50	173	16650	5.77457	1	0.454495	81.8543
GOTERM_BP_FAT	GO:0033198~response to ATP	2	3.77358	0.0927652	HSPD1, ASPH	50	33	16650	20.1818	1	0.456687	82.1343
GOTERM_BP_FAT	GO:0007435~salivary gland morphogenesis	2	3.77358	0.0927652	FGFR2, TGM2	50	33	16650	20.1818	1	0.456687	82.1343
GOTERM_BP_FAT	GO:1901976~regulation of cell cycle checkpoint	2	3.77358	0.0927652	DUSP1, NDRG1	50	33	16650	20.1818	1	0.456687	82.1343
GOTERM_BP_FAT	GO:0002931~response to ischemia	2	3.77358	0.0927652	EGR1, HSPD1	50	33	16650	20.1818	1	0.456687	82.1343
GOTERM_BP_FAT	GO:0034613~cellular protein localization	9	16.9811	0.0937128	SYNE2, JUN, OBSL1, ASPH, PMAIP1, SNAI2, SOX9, PPP1R15A, BARD1	50	1600	16650	1.87312	1	0.459421	82.4615
GOTERM_BP_FAT	GO:0051707~response to other organism	6	11.3208	0.0954262	FOS, JUN, IGHD, HSPD1, PMAIP1, JUNB	50	829	16650	2.41013	1	0.464962	83.0389
GOTERM_BP_FAT	GO:0043207~response to external biotic stimulus	6	11.3208	0.0954262	FOS, JUN, IGHD, HSPD1, PMAIP1, JUNB	50	829	16650	2.41013	1	0.464962	83.0389
GOTERM_BP_FAT	GO:0070374~positive regulation of ERK1 and ERK2 cascade	3	5.66038	0.0955844	FGFR2, JUN, PDGFD	50	177	16650	5.64407	1	0.464732	83.0913
GOTERM_BP_FAT	GO:0010564~regulation of cell cycle process	5	9.43396	0.0971126	DUSP1, BTG2, OBSL1, NDRG1, SOX9	50	595	16650	2.79832	1	0.469518	83.5897
GOTERM_BP_FAT	GO:0070727~cellular macromolecule localization	9	16.9811	0.0971337	SYNE2, JUN, OBSL1, ASPH, PMAIP1, SNAI2, SOX9, PPP1R15A, BARD1	50	1613	16650	1.85803	1	0.468782	83.5965
GOTERM_BP_FAT	GO:0043086~negative regulation of catalytic activity	6	11.3208	0.0991831	PRKAR2B, DUSP1, NR4A1, GADD45B, PPP1R15A, TFPI2	50	839	16650	2.38141	1	0.475386	84.2429
GOTERM_BP_FAT	GO:0010001~glial cell differentiation	3	5.66038	0.0992422	MYRF, NDRG1, SOX9	50	181	16650	5.51934	1	0.474785	84.2612
GOTERM_BP_FAT	GO:0042445~hormone metabolic process	3	5.66038	0.0992422	EGR1, MME, CYP26A1	50	181	16650	5.51934	1	0.474785	84.2612

## Sheet: downregulated DEGs-CC
Category	Term	Count	%	PValue	Genes	List Total	Pop Hits	Pop Total	Fold Enrichment	Bonferroni	Benjamini	FDR
GOTERM_CC_FAT	GO:0031012~extracellular matrix	7	13.2075	0.00621779	FGFR2, LAMB4, EFEMP1, TGM2, HSPD1, LAMB1, TFPI2	47	530	14527	4.08226	0.788401	0.788401	7.77842
GOTERM_CC_FAT	GO:0005783~endoplasmic reticulum	12	22.6415	0.0127484	HLA-DQB1, FAM134B, FOS, SYNE2, TGM2, MYRF, CYP26A1, PDGFD, HSPD1, SCARA3, ASPH, PPP1R15A	47	1660	14527	2.23435	0.959023	0.797573	15.3439
GOTERM_CC_FAT	GO:0005667~transcription factor complex	5	9.43396	0.0167799	FOS, JUN, NR4A1, SOX9, JUNB	47	312	14527	4.95329	0.985208	0.754522	19.7238
GOTERM_CC_FAT	GO:0031968~organelle outer membrane	4	7.54717	0.0209544	SYNE2, KMO, PMAIP1, PPP1R15A	47	186	14527	6.64699	0.994872	0.732403	24.038
GOTERM_CC_FAT	GO:0019867~outer membrane	4	7.54717	0.0227604	SYNE2, KMO, PMAIP1, PPP1R15A	47	192	14527	6.43927	0.996762	0.682274	25.8372
GOTERM_CC_FAT	GO:0044432~endoplasmic reticulum part	9	16.9811	0.0298762	HLA-DQB1, FAM134B, SYNE2, MYRF, CYP26A1, PDGFD, SCARA3, ASPH, PPP1R15A	47	1177	14527	2.36344	0.999475	0.715994	32.5503
GOTERM_CC_FAT	GO:0005789~endoplasmic reticulum membrane	8	15.0943	0.0363273	HLA-DQB1, FAM134B, SYNE2, MYRF, CYP26A1, SCARA3, ASPH, PPP1R15A	47	999	14527	2.47516	0.9999	0.731867	38.147
GOTERM_CC_FAT	GO:0005654~nucleoplasm	16	30.1887	0.0387189	EGR1, IER2, FGFR2, NR4A2, NR4A1, SOX9, JUNB, FOS, SYNE2, ATF3, SRSF7, JUN, ADD3, MYC, SMARCA2, BARD1	47	2996	14527	1.65065	0.999946	0.707437	40.1105
GOTERM_CC_FAT	GO:0042175~nuclear outer membrane-endoplasmic reticulum membrane network	8	15.0943	0.0401735	HLA-DQB1, FAM134B, SYNE2, MYRF, CYP26A1, SCARA3, ASPH, PPP1R15A	47	1021	14527	2.42182	0.999963	0.678388	41.2764
GOTERM_CC_FAT	GO:0070062~extracellular exosome	15	28.3019	0.0482358	EFEMP1, MME, KMO, PRKAR2B, SYNE2, BTG2, SRSF7, IGHD, TGM2, NDRG1, HSPD1, PDGFD, CFD, LAMB1, IGFBP3	47	2811	14527	1.64933	0.999995	0.708001	47.3677
GOTERM_CC_FAT	GO:1903561~extracellular vesicle	15	28.3019	0.0500261	EFEMP1, MME, KMO, PRKAR2B, SYNE2, BTG2, SRSF7, IGHD, TGM2, NDRG1, HSPD1, PDGFD, CFD, LAMB1, IGFBP3	47	2825	14527	1.64116	0.999997	0.687052	48.6387
GOTERM_CC_FAT	GO:0043230~extracellular organelle	15	28.3019	0.0501558	EFEMP1, MME, KMO, PRKAR2B, SYNE2, BTG2, SRSF7, IGHD, TGM2, NDRG1, HSPD1, PDGFD, CFD, LAMB1, IGFBP3	47	2826	14527	1.64058	0.999997	0.656215	48.7297
GOTERM_CC_FAT	GO:0000790~nuclear chromatin	4	7.54717	0.0780792	JUN, SNAI2, SMARCA2, JUNB	47	316	14527	3.91247	1	0.78926	65.1963
GOTERM_CC_FAT	GO:0030176~integral component of endoplasmic reticulum membrane	3	5.66038	0.0788683	HLA-DQB1, FAM134B, ASPH	47	147	14527	6.30786	1	0.768028	65.5811
GOTERM_CC_FAT	GO:0044421~extracellular region part	18	33.9623	0.0824478	EFEMP1, MME, KMO, PRKAR2B, LAMB4, SYNE2, BTG2, SRSF7, IGHD, SEMA3E, TGM2, NDRG1, HSPD1, PDGFD, CFD, LAMB1, IGFBP3, TFPI2	47	3878	14527	1.43464	1	0.760298	67.2777
GOTERM_CC_FAT	GO:0031227~intrinsic component of endoplasmic reticulum membrane	3	5.66038	0.083522	HLA-DQB1, FAM134B, ASPH	47	152	14527	6.10036	1	0.74265	67.7715
GOTERM_CC_FAT	GO:0031988~membrane-bounded vesicle	17	32.0755	0.0855884	HLA-DQB1, FGFR2, EFEMP1, MME, KMO, PRKAR2B, SYNE2, SRSF7, BTG2, IGHD, TGM2, NDRG1, HSPD1, PDGFD, CFD, LAMB1, IGFBP3	47	3611	14527	1.45512	1	0.730325	68.7023
GOTERM_CC_FAT	GO:0005794~Golgi apparatus	9	16.9811	0.0915436	FGFR2, HLA-DQB1, FAM134B, NDST4, OBSL1, PDGFD, HSPD1, SCARA3, PPP1R15A	47	1482	14527	1.87704	1	0.735024	71.2478
GOTERM_CC_FAT	GO:0005741~mitochondrial outer membrane	3	5.66038	0.0940471	KMO, PMAIP1, PPP1R15A	47	163	14527	5.68868	1	0.725932	72.2596
GOTERM_CC_FAT	GO:0000228~nuclear chromosome	5	9.43396	0.0978286	JUN, SNAI2, ADD3, SMARCA2, JUNB	47	555	14527	2.78455	1	0.722445	73.7259

## Sheet: downregulated DEGs-MF
Category	Term	Count	%	PValue	Genes	List Total	Pop Hits	Pop Total	Fold Enrichment	Bonferroni	Benjamini	FDR
GOTERM_MF_FAT	GO:0000982~transcription factor activity, RNA polymerase II core promoter proximal region sequence-specific binding	12	22.6415	3.59842e-09	EGR1, FOS, ATF3, BTG2, JUN, NR4A2, NR4A1, FOSB, SNAI2, SOX9, MYC, JUNB	47	343	15478	11.5214	1.06873e-06	1.06873e-06	4.8012e-06
GOTERM_MF_FAT	GO:0001228~transcriptional activator activity, RNA polymerase II transcription regulatory region sequence-specific binding	10	18.8679	4.05362e-07	EGR1, FOS, ATF3, JUN, NR4A2, NR4A1, FOSB, SOX9, MYC, JUNB	47	326	15478	10.1018	0.000120385	6.01945e-05	0.000540855
GOTERM_MF_FAT	GO:0001077~transcriptional activator activity, RNA polymerase II core promoter proximal region sequence-specific binding	9	16.9811	4.10806e-07	EGR1, FOS, JUN, NR4A2, NR4A1, FOSB, SOX9, MYC, JUNB	47	236	15478	12.5588	0.000122002	4.0669e-05	0.000548118
GOTERM_MF_FAT	GO:0000981~RNA polymerase II transcription factor activity, sequence-specific DNA binding	12	22.6415	2.73798e-06	EGR1, FOS, ATF3, BTG2, JUN, NR4A2, NR4A1, FOSB, SNAI2, SOX9, MYC, JUNB	47	662	15478	5.96953	0.000812852	0.000203275	0.0036531
GOTERM_MF_FAT	GO:0003700~transcription factor activity, sequence-specific DNA binding	13	24.5283	0.000185571	EGR1, FOS, ATF3, BTG2, JUN, MYRF, NR4A2, NR4A1, FOSB, SNAI2, SOX9, MYC, JUNB	47	1231	15478	3.47778	0.0536281	0.0109634	0.247315
GOTERM_MF_FAT	GO:0001071~nucleic acid binding transcription factor activity	13	24.5283	0.000186994	EGR1, FOS, ATF3, BTG2, JUN, MYRF, NR4A2, NR4A1, FOSB, SNAI2, SOX9, MYC, JUNB	47	1232	15478	3.47496	0.0540281	0.00921436	0.24921
GOTERM_MF_FAT	GO:1990837~sequence-specific double-stranded DNA binding	10	18.8679	0.000239085	EGR1, FOS, ATF3, JUN, NR4A2, HSPD1, FOSB, SOX9, MYC, JUNB	47	725	15478	4.54233	0.0685537	0.010094	0.31853
GOTERM_MF_FAT	GO:0043565~sequence-specific DNA binding	12	22.6415	0.00025037	EGR1, FOS, ATF3, JUN, NR4A2, NR4A1, HSPD1, FOSB, SNAI2, SOX9, MYC, JUNB	47	1080	15478	3.6591	0.0716711	0.00925307	0.333541
GOTERM_MF_FAT	GO:0003690~double-stranded DNA binding	10	18.8679	0.000516494	EGR1, FOS, ATF3, JUN, NR4A2, HSPD1, FOSB, SOX9, MYC, JUNB	47	805	15478	4.09092	0.142246	0.0169042	0.686942
GOTERM_MF_FAT	GO:0044212~transcription regulatory region DNA binding	10	18.8679	0.000784155	EGR1, FOS, ATF3, JUN, NR4A2, FOSB, SOX9, SMARCA2, MYC, JUNB	47	853	15478	3.86072	0.207835	0.0230292	1.04121
GOTERM_MF_FAT	GO:0000975~regulatory region DNA binding	10	18.8679	0.000804087	EGR1, FOS, ATF3, JUN, NR4A2, FOSB, SOX9, SMARCA2, MYC, JUNB	47	856	15478	3.84719	0.212514	0.0214849	1.06755
GOTERM_MF_FAT	GO:0001067~regulatory region nucleic acid binding	10	18.8679	0.000810823	EGR1, FOS, ATF3, JUN, NR4A2, FOSB, SOX9, SMARCA2, MYC, JUNB	47	857	15478	3.8427	0.214089	0.0198758	1.07645
GOTERM_MF_FAT	GO:0000976~transcription regulatory region sequence-specific DNA binding	9	16.9811	0.000885786	EGR1, FOS, ATF3, JUN, NR4A2, FOSB, SOX9, MYC, JUNB	47	692	15478	4.28305	0.231408	0.0200422	1.17543
GOTERM_MF_FAT	GO:0000977~RNA polymerase II regulatory region sequence-specific DNA binding	8	15.0943	0.00184192	EGR1, FOS, ATF3, JUN, NR4A2, FOSB, MYC, JUNB	47	601	15478	4.38362	0.421638	0.0383561	2.42985
GOTERM_MF_FAT	GO:0001012~RNA polymerase II regulatory region DNA binding	8	15.0943	0.00189487	EGR1, FOS, ATF3, JUN, NR4A2, FOSB, MYC, JUNB	47	604	15478	4.36184	0.430678	0.0368576	2.49888
GOTERM_MF_FAT	GO:0046982~protein heterodimerization activity	7	13.2075	0.00240745	FOS, ATF3, JUN, NR4A2, NR4A1, SOX9, BARD1	47	465	15478	4.95749	0.511235	0.0437559	3.16485
GOTERM_MF_FAT	GO:0008134~transcription factor binding	7	13.2075	0.0038762	FOS, JUN, NR4A2, FOSB, SOX9, MYC, JUNB	47	512	15478	4.50241	0.684459	0.0656004	5.04991
GOTERM_MF_FAT	GO:0000978~RNA polymerase II core promoter proximal region sequence-specific DNA binding	6	11.3208	0.00395772	FOS, ATF3, JUN, FOSB, MYC, JUNB	47	356	15478	5.55032	0.692037	0.0633373	5.15355
GOTERM_MF_FAT	GO:0000987~core promoter proximal region sequence-specific DNA binding	6	11.3208	0.00498537	FOS, ATF3, JUN, FOSB, MYC, JUNB	47	376	15478	5.25509	0.773352	0.0751503	6.4509
GOTERM_MF_FAT	GO:0001159~core promoter proximal region DNA binding	6	11.3208	0.00509765	FOS, ATF3, JUN, FOSB, MYC, JUNB	47	378	15478	5.22729	0.780822	0.0730852	6.59166
GOTERM_MF_FAT	GO:0003677~DNA binding	15	28.3019	0.0140467	IER2, EGR1, NR4A2, NR4A1, FOSB, SNAI2, SOX9, JUNB, FOS, ATF3, JUN, MYRF, HSPD1, MYC, SMARCA2	47	2562	15478	1.9281	0.985026	0.181325	17.2004
GOTERM_MF_FAT	GO:0003682~chromatin binding	6	11.3208	0.0164028	EGR1, FOS, JUN, SNAI2, SOX9, SMARCA2	47	504	15478	3.92047	0.992642	0.200104	19.8019
GOTERM_MF_FAT	GO:0046983~protein dimerization activity	9	16.9811	0.0197418	FGFR2, FOS, ATF3, JUN, NR4A2, NR4A1, SOX9, MYC, BARD1	47	1160	15478	2.55506	0.99732	0.227	23.3592
GOTERM_MF_FAT	GO:0072542~protein phosphatase activator activity	2	3.77358	0.0235351	IGFBP3, PPP1R15A	47	8	15478	82.3298	0.999153	0.255267	27.2232
GOTERM_MF_FAT	GO:0003705~transcription factor activity, RNA polymerase II distal enhancer sequence-specific binding	3	5.66038	0.0317697	JUN, SNAI2, SOX9	47	94	15478	10.5102	0.999932	0.318562	34.999
GOTERM_MF_FAT	GO:0019211~phosphatase activator activity	2	3.77358	0.0322203	IGFBP3, PPP1R15A	47	11	15478	59.8762	0.99994	0.312102	35.4015
GOTERM_MF_FAT	GO:0001046~core promoter sequence-specific DNA binding	3	5.66038	0.0395548	FOS, NR4A2, SOX9	47	106	15478	9.32035	0.999994	0.358497	41.6367
GOTERM_MF_FAT	GO:0034236~protein kinase A catalytic subunit binding	2	3.77358	0.04083	PRKAR2B, SOX9	47	14	15478	47.0456	0.999996	0.357366	42.6622
GOTERM_MF_FAT	GO:0001078~transcriptional repressor activity, RNA polymerase II core promoter proximal region sequence-specific binding	3	5.66038	0.0429918	ATF3, BTG2, SNAI2	47	111	15478	8.90052	0.999998	0.362397	44.3627
GOTERM_MF_FAT	GO:0019838~growth factor binding	3	5.66038	0.0554625	FGFR2, DUSP1, IGFBP3	47	128	15478	7.71842	1	0.431579	53.2953
GOTERM_MF_FAT	GO:0070412~R-SMAD binding	2	3.77358	0.0606288	FOS, JUN	47	21	15478	31.3637	1	0.450759	56.591
GOTERM_MF_FAT	GO:0003676~nucleic acid binding	18	33.9623	0.0771307	EGR1, IER2, NR4A2, NR4A1, FOSB, SNAI2, SOX9, JUNB, FOS, ATF3, SRSF7, JUN, MYRF, EIF1, HSPD1, MYC, SMARCA2, BARD1	47	4097	15478	1.44685	1	0.525258	65.7326
GOTERM_MF_FAT	GO:0005198~structural molecule activity	6	11.3208	0.0810772	CLDN4, SCARA3, ASPH, LAMB1, ADD3, TFPI2	47	782	15478	2.52675	1	0.532791	67.637
GOTERM_MF_FAT	GO:0001047~core promoter binding	3	5.66038	0.0827008	FOS, NR4A2, SOX9	47	161	15478	6.13638	1	0.52954	68.3917
GOTERM_MF_FAT	GO:0016705~oxidoreductase activity, acting on paired donors, with incorporation or reduction of molecular oxygen	3	5.66038	0.0871303	CYP26A1, KMO, ASPH	47	166	15478	5.95155	1	0.53864	70.3686
GOTERM_MF_FAT	GO:0044877~macromolecular complex binding	8	15.0943	0.0891359	EGR1, FOS, SYNE2, JUN, SNAI2, SOX9, SMARCA2, MYC	47	1306	15478	2.01727	1	0.537095	71.2255
GOTERM_MF_FAT	GO:0001227~transcriptional repressor activity, RNA polymerase II transcription regulatory region sequence-specific binding	3	5.66038	0.0961982	ATF3, BTG2, SNAI2	47	176	15478	5.61339	1	0.555984	74.0639

## Sheet: downregulated DEGs-KEGG
Category	Term	Count	%	PValue	Genes	List Total	Pop Hits	Pop Total	Fold Enrichment	Bonferroni	Benjamini	FDR
KEGG_PATHWAY	hsa04010:MAPK signaling pathway	7	13.2075	0.00134105	FGFR2, FOS, DUSP1, JUN, NR4A1, GADD45B, MYC	35	255	6910	5.41961	0.131428	0.131428	1.49191
KEGG_PATHWAY	hsa05166:HTLV-I infection	6	11.3208	0.00774379	HLA-DQB1, EGR1, FOS, ATF3, JUN, MYC	35	256	6910	4.62723	0.557919	0.335109	8.33941
KEGG_PATHWAY	hsa04151:PI3K-Akt signaling pathway	6	11.3208	0.0254403	FGFR2, LAMB4, NR4A1, PDGFD, LAMB1, MYC	35	345	6910	3.43354	0.933183	0.594215	25.0726
KEGG_PATHWAY	hsa04380:Osteoclast differentiation	4	7.54717	0.025975	FOS, JUN, FOSB, JUNB	35	131	6910	6.02835	0.936925	0.498853	25.5318
KEGG_PATHWAY	hsa05210:Colorectal cancer	3	5.66038	0.0369724	FOS, JUN, MYC	35	62	6910	9.553	0.980855	0.546672	34.4258
KEGG_PATHWAY	hsa05200:Pathways in cancer	6	11.3208	0.0413831	FGFR2, LAMB4, FOS, JUN, LAMB1, MYC	35	393	6910	3.01418	0.988177	0.522703	37.7123
KEGG_PATHWAY	hsa05031:Amphetamine addiction	3	5.66038	0.0414321	FOS, JUN, FOSB	35	66	6910	8.97403	0.98824	0.469918	37.748
KEGG_PATHWAY	hsa04115:p53 signaling pathway	3	5.66038	0.0425775	PMAIP1, GADD45B, IGFBP3	35	67	6910	8.84009	0.989628	0.435083	38.5762
KEGG_PATHWAY	hsa05140:Leishmaniasis	3	5.66038	0.047277	HLA-DQB1, FOS, JUN	35	71	6910	8.34205	0.993813	0.431656	41.87
KEGG_PATHWAY	hsa05168:Herpes simplex infection	4	7.54717	0.0600264	HLA-DQB1, FOS, SRSF7, JUN	35	183	6910	4.31538	0.998496	0.477947	50.0124
KEGG_PATHWAY	hsa05222:Small cell lung cancer	3	5.66038	0.0651035	LAMB4, LAMB1, MYC	35	85	6910	6.96807	0.999149	0.474074	52.9548
KEGG_PATHWAY	hsa05323:Rheumatoid arthritis	3	5.66038	0.0691797	HLA-DQB1, FOS, JUN	35	88	6910	6.73052	0.999462	0.465957	55.202
KEGG_PATHWAY	hsa04510:Focal adhesion	4	7.54717	0.0795411	LAMB4, JUN, PDGFD, LAMB1	35	206	6910	3.83356	0.999834	0.488004	60.4811
KEGG_PATHWAY	hsa05231:Choline metabolism in cancer	3	5.66038	0.0877636	FOS, JUN, PDGFD	35	101	6910	5.86421	0.999935	0.497883	64.2601
KEGG_PATHWAY	hsa04668:TNF signaling pathway	3	5.66038	0.0952742	FOS, JUN, JUNB	35	106	6910	5.5876	0.999973	0.503844	67.4211

## Sheet: upregulated DEGs-BP
Category	Term	Count	%	PValue	Genes	List Total	Pop Hits	Pop Total	Fold Enrichment	Bonferroni	Benjamini	FDR
GOTERM_BP_FAT	GO:0030198~extracellular matrix organization	29	15.847	1.09631e-17	A2M, LTBP2, TNC, COL3A1, ELN, MMP7, POSTN, GPM6B, MMP2, HPSE, PRSS2, COL6A3, COL6A1, LOXL1, SPP1, FN1, COL4A2, COL4A1, SPARC, CAPN2, VWF, COL14A1, BGN, RGCC, PECAM1, COL1A2, MYH11, COL1A1, MUC5AC	175	334	16650	8.26091	3.86779e-14	3.86779e-14	2.00974e-14
GOTERM_BP_FAT	GO:0043062~extracellular structure organization	29	15.847	1.1856e-17	A2M, LTBP2, TNC, COL3A1, ELN, MMP7, POSTN, GPM6B, MMP2, HPSE, PRSS2, COL6A3, COL6A1, LOXL1, SPP1, FN1, COL4A2, COL4A1, SPARC, CAPN2, VWF, COL14A1, BGN, RGCC, PECAM1, COL1A2, MYH11, COL1A1, MUC5AC	175	335	16650	8.23625	4.18279e-14	2.0914e-14	2.17341e-14
GOTERM_BP_FAT	GO:0030574~collagen catabolic process	12	6.55738	6.48871e-11	COL4A2, COL4A1, PRSS2, COL3A1, COL6A3, COL1A2, COL15A1, MMP7, COL6A1, COL1A1, CTSB, MMP2	175	65	16650	17.5648	2.28922e-07	7.63072e-08	1.1895e-07
GOTERM_BP_FAT	GO:0044243~multicellular organism catabolic process	12	6.55738	2.05698e-10	COL4A2, COL4A1, PRSS2, COL3A1, COL6A3, COL1A2, COL15A1, MMP7, COL6A1, COL1A1, CTSB, MMP2	175	72	16650	15.8571	7.25704e-07	1.81426e-07	3.77082e-07
GOTERM_BP_FAT	GO:0001944~vasculature development	28	15.3005	2.07605e-10	LTBP1, ENPP2, COL3A1, SOX4, GJA1, AQP1, MMP2, CDH5, HPSE, APOE, QKI, TCF4, LOXL1, THBS2, FN1, COL4A2, COL4A1, ACTA2, EFNB2, COL15A1, SPARC, MCAM, CLIC4, RGCC, PECAM1, COL1A2, TFAP2B, COL1A1	175	610	16650	4.36721	7.32432e-07	1.46486e-07	3.80578e-07
GOTERM_BP_FAT	GO:0044259~multicellular organismal macromolecule metabolic process	14	7.65027	2.18871e-10	COL4A2, COL4A1, COL3A1, COL15A1, MMP7, MMP2, AKR1C3, PRSS2, RGCC, COL6A3, COL1A2, COL6A1, COL1A1, CTSB	175	115	16650	11.5826	7.72178e-07	1.28696e-07	4.0123e-07
GOTERM_BP_FAT	GO:0007155~cell adhesion	48	26.2295	2.65494e-10	ATP1B1, PLXNC1, S100A8, TNC, CALD1, S100A9, COL3A1, SOX4, SPOCK1, GPM6B, POSTN, TPM1, GPRC5A, CDH5, ALCAM, LY6D, SERPINE2, CD93, HPSE, PRSS2, COL6A3, COL6A1, CEACAM5, MSN, CD24, THBS2, SPP1, TES, FN1, CLCA2, S100P, EFNB2, COL15A1, ACTN1, PCDH7, MCAM, MUC4, NCK2, VWF, COL14A1, DSG3, PECAM1, RGCC, HLA-DPA1, COL1A1, CLEC7A, CSTA, CDH11	175	1699	16650	2.68797	9.36663e-07	1.33809e-07	4.86698e-07
GOTERM_BP_FAT	GO:0022610~biological adhesion	48	26.2295	2.98869e-10	ATP1B1, PLXNC1, S100A8, TNC, CALD1, S100A9, COL3A1, SOX4, SPOCK1, GPM6B, POSTN, TPM1, GPRC5A, CDH5, ALCAM, LY6D, SERPINE2, CD93, HPSE, PRSS2, COL6A3, COL6A1, CEACAM5, MSN, CD24, THBS2, SPP1, TES, FN1, CLCA2, S100P, EFNB2, COL15A1, ACTN1, PCDH7, MCAM, MUC4, NCK2, VWF, COL14A1, DSG3, PECAM1, RGCC, HLA-DPA1, COL1A1, CLEC7A, CSTA, CDH11	175	1705	16650	2.67851	1.05441e-06	1.31801e-07	5.4788e-07
GOTERM_BP_FAT	GO:0001568~blood vessel development	27	14.7541	3.06519e-10	LTBP1, COL3A1, SOX4, GJA1, AQP1, MMP2, CDH5, HPSE, APOE, QKI, TCF4, LOXL1, THBS2, FN1, COL4A2, COL4A1, ACTA2, EFNB2, COL15A1, SPARC, MCAM, CLIC4, RGCC, PECAM1, COL1A2, TFAP2B, COL1A1	175	576	16650	4.45982	1.0814e-06	1.20156e-07	5.61905e-07
GOTERM_BP_FAT	GO:0044236~multicellular organism metabolic process	14	7.65027	1.35943e-09	COL4A2, COL4A1, COL3A1, COL15A1, MMP7, MMP2, AKR1C3, PRSS2, RGCC, COL6A3, COL1A2, COL6A1, COL1A1, CTSB	175	133	16650	10.015	4.79607e-06	4.79608e-07	2.49208e-06
GOTERM_BP_FAT	GO:0032963~collagen metabolic process	13	7.10383	1.67812e-09	COL4A2, COL4A1, PRSS2, RGCC, COL3A1, COL6A3, COL1A2, COL15A1, MMP7, COL6A1, COL1A1, CTSB, MMP2	175	110	16650	11.2442	5.92038e-06	5.38218e-07	3.07629e-06
GOTERM_BP_FAT	GO:0072359~circulatory system development	33	18.0328	3.10876e-09	LTBP1, ENPP2, COL3A1, GJA1, SOX4, AQP1, TPM1, MMP2, CDH5, APLNR, HPSE, APOE, QKI, TCF4, LOXL1, THBS2, FN1, COL4A2, COL4A1, ACTA2, EFNB2, COL15A1, SPARC, MCAM, NEBL, CPE, CLIC4, RGCC, PECAM1, COL1A2, MYH11, TFAP2B, COL1A1	175	945	16650	3.32245	1.09677e-05	9.13976e-07	5.69892e-06
GOTERM_BP_FAT	GO:0072358~cardiovascular system development	33	18.0328	3.10876e-09	LTBP1, ENPP2, COL3A1, GJA1, SOX4, AQP1, TPM1, MMP2, CDH5, APLNR, HPSE, APOE, QKI, TCF4, LOXL1, THBS2, FN1, COL4A2, COL4A1, ACTA2, EFNB2, COL15A1, SPARC, MCAM, NEBL, CPE, CLIC4, RGCC, PECAM1, COL1A2, MYH11, TFAP2B, COL1A1	175	945	16650	3.32245	1.09677e-05	9.13976e-07	5.69892e-06
GOTERM_BP_FAT	GO:0030855~epithelial cell differentiation	24	13.1148	2.3174e-08	COL4A1, ACTA2, SOX4, GJA1, KRT10, FRZB, CDH5, AKR1C3, AKR1C2, TYMS, TAGLN, SPRR1A, KRT16, CLIC4, SPRR1B, PECAM1, SPRR2B, UPK1B, SPRR3, CSTA, CD24, MSN, CTSB, AKR1C1	175	563	16650	4.05582	8.17546e-05	6.28906e-06	4.24821e-05
GOTERM_BP_FAT	GO:0042060~wound healing	23	12.5683	5.3879e-08	A2M, KRT6A, S100A8, TNC, COL3A1, S100A9, GJA1, ACTN1, POSTN, TSPAN8, SPARC, MCAM, TPM1, VWF, SERPINE2, HPSE, APOE, PECAM1, COL1A2, SPRR3, COL1A1, TFF1, FN1	175	542	16650	4.03743	0.000190067	1.35774e-05	9.87698e-05
GOTERM_BP_FAT	GO:0071229~cellular response to acid chemical	13	7.10383	1.7495e-07	COL4A1, TNC, COL3A1, ABCA1, CAPN2, AQP1, MMP2, AKR1C3, AKR1C2, COL1A2, COL6A1, COL1A1, AKR1C1	175	166	16650	7.45095	0.000617035	4.11475e-05	0.000320715
GOTERM_BP_FAT	GO:0048514~blood vessel morphogenesis	21	11.4754	2.15342e-07	COL4A2, COL4A1, COL3A1, EFNB2, COL15A1, SOX4, GJA1, SPARC, MCAM, AQP1, MMP2, HPSE, APOE, CLIC4, PECAM1, RGCC, TFAP2B, QKI, TCF4, THBS2, FN1	175	491	16650	4.06925	0.00075944	4.74819e-05	0.00039476
GOTERM_BP_FAT	GO:0033273~response to vitamin	10	5.46448	2.78693e-07	ATP2B1, TYMS, KYNU, TYR, RBP1, TNC, POSTN, COL1A1, SPARC, SPP1	175	86	16650	11.0631	0.000982745	5.78353e-05	0.000510892
GOTERM_BP_FAT	GO:0009611~response to wounding	24	13.1148	3.00291e-07	A2M, KRT6A, S100A8, TNC, COL3A1, S100A9, GJA1, ACTN1, POSTN, TSPAN8, SPARC, MCAM, TPM1, VWF, SERPINE2, HPSE, APOE, PECAM1, COL1A2, SPRR3, COL1A1, TFF1, SPP1, FN1	175	649	16650	3.51838	0.00105886	5.88553e-05	0.000550485
GOTERM_BP_FAT	GO:0060429~epithelium development	31	16.9399	5.33382e-07	KRT6A, TNC, SOX4, GJA1, CDH5, AKR1C3, AKR1C2, TYMS, SERPINE2, HPSE, ALDH1A3, SPRR2B, UPK1B, MSN, CD24, AKR1C1, COL4A1, ACTA2, EFNB2, KRT10, FRZB, TAGLN, SPRR1A, CLIC4, KRT16, SPRR1B, PECAM1, SPRR3, TFAP2B, CSTA, CTSB	175	1060	16650	2.78248	0.00188	9.90357e-05	0.000977779
GOTERM_BP_FAT	GO:0010033~response to organic substance	57	31.1475	5.85497e-07	ASPN, KYNU, ATP6V0E1, LTBP1, S100A8, LTBP2, DUOX2, DICER1, GJA1, MED24, SYNCRIP, POSTN, AQP1, MMP2, ATP2B1, AKR1C3, AKR1C2, EDNRB, TYR, SRD5A1, MSN, MX2, LOXL1, AKR1C1, NCK2, GRB10, BGN, COL1A2, TFAP2B, CTSC, HLA-DPA1, COL1A1, CTSB, RBP1, TNC, COL3A1, SOX4, PLVAP, ABCA1, CDH5, TYMS, LY6D, COL6A1, TFF1, CD24, TCF4, SPP1, COL4A2, S100P, COL4A1, SPARC, CAPN2, ABCG1, CCL18, RAB31, FABP4, CLEC7A	175	2822	16650	1.92174	0.0020635	0.000103276	0.00107332
GOTERM_BP_FAT	GO:0043588~skin development	14	7.65027	1.21362e-06	COL3A1, KRT10, AKR1C3, SPRR1A, KRT16, CLIC4, HPSE, SPRR1B, SPRR2B, SPRR3, TFAP2B, COL1A2, CSTA, COL1A1	175	236	16650	5.64407	0.00427249	0.000203867	0.00222475
GOTERM_BP_FAT	GO:0001101~response to acid chemical	15	8.19672	1.35938e-06	COL4A1, TNC, COL3A1, SPARC, ABCA1, CAPN2, AQP1, MMP2, AKR1C3, AKR1C2, TYMS, COL1A2, COL6A1, COL1A1, AKR1C1	175	278	16650	5.13361	0.00478443	0.000217972	0.00249196
GOTERM_BP_FAT	GO:0018149~peptide cross-linking	8	4.37158	1.81758e-06	BGN, SPRR1A, SPRR1B, COL3A1, SPRR2B, SPRR3, CSTA, FN1	175	56	16650	13.5918	0.0063919	0.000278762	0.00333189
GOTERM_BP_FAT	GO:0007584~response to nutrient	12	6.55738	1.84131e-06	AKR1C3, ATP2B1, TYMS, KYNU, TYR, RBP1, TNC, POSTN, COL1A1, ABCA1, SPARC, SPP1	175	171	16650	6.67669	0.00647511	0.000270637	0.0033754
GOTERM_BP_FAT	GO:0009605~response to external stimulus	44	24.0437	6.38591e-06	KYNU, A2M, PLXNC1, S100A8, RBP1, ENPP2, TNC, S100A9, DUOX2, COL3A1, MMP7, GJA1, TSPAN8, POSTN, ABCA1, AQP1, ATP2B1, AKR1C3, ALCAM, TYMS, EDNRB, TYR, HIST1H2BK, SERPINE2, APOE, HPSE, ALDH1A3, SRD5A1, CD24, MX2, LOXL1, SPP1, FCER1A, HIST1H2BD, ACTA2, EFNB2, LYZ, SPARC, CCL18, HIST2H2BE, FABP4, COL1A1, CLEC7A, RAB38	175	2073	16650	2.01943	0.0222777	0.000900777	0.0117059
GOTERM_BP_FAT	GO:1901700~response to oxygen-containing compound	35	19.1257	7.50469e-06	ATP6V0E1, S100A8, TNC, DUOX2, COL3A1, GJA1, SOX4, POSTN, ABCA1, AQP1, TPM1, MMP2, ATP2B1, AKR1C3, EDNRB, AKR1C2, TYMS, TYR, APOE, COL6A1, SRD5A1, TFF1, MSN, LOXL1, AKR1C1, SPP1, COL4A1, SPARC, CAPN2, GRB10, RAB31, TXN, COL1A2, COL1A1, CLEC7A	175	1466	16650	2.27149	0.0261292	0.00101781	0.0137565
GOTERM_BP_FAT	GO:0050878~regulation of body fluid levels	18	9.83607	2.15754e-05	A2M, COL3A1, S100A9, HK2, GJA1, ACTN1, TSPAN8, AQP1, EDNRB, VWF, APLNR, SERPINE2, HPSE, APOE, KRT16, COL1A2, TFAP2B, COL1A1	175	503	16650	3.40471	0.073294	0.00281525	0.0395442
GOTERM_BP_FAT	GO:0071230~cellular response to amino acid stimulus	7	3.82514	2.26616e-05	COL4A1, COL3A1, COL1A2, COL6A1, COL1A1, CAPN2, MMP2	175	55	16650	12.1091	0.0768385	0.00285132	0.0415346
GOTERM_BP_FAT	GO:0009719~response to endogenous stimulus	35	19.1257	2.36178e-05	ASPN, ATP6V0E1, KYNU, LTBP1, LTBP2, TNC, DUOX2, COL3A1, GJA1, MED24, POSTN, ABCA1, AQP1, MMP2, CDH5, ATP2B1, AKR1C3, TYMS, AKR1C2, TYR, COL6A1, SRD5A1, TFF1, AKR1C1, SPP1, COL4A2, COL4A1, SPARC, CAPN2, ABCG1, GRB10, RAB31, COL1A2, COL1A1, CTSB	175	1548	16650	2.15116	0.0799476	0.00286914	0.0432868
GOTERM_BP_FAT	GO:1901701~cellular response to oxygen-containing compound	25	13.6612	2.77536e-05	ATP6V0E1, TNC, COL3A1, SOX4, POSTN, ABCA1, AQP1, MMP2, TPM1, AKR1C3, ATP2B1, EDNRB, AKR1C2, COL6A1, SRD5A1, MSN, AKR1C1, COL4A1, CAPN2, GRB10, RAB31, TXN, COL1A2, COL1A1, CLEC7A	175	912	16650	2.60808	0.0932749	0.00325854	0.050865
GOTERM_BP_FAT	GO:0070887~cellular response to chemical stimulus	50	27.3224	2.78212e-05	ASPN, CYP3A5, ATP6V0E1, LTBP1, S100A8, LTBP2, S100A9, DUOX2, DICER1, MED24, SYNCRIP, POSTN, AQP1, MMP2, ATP2B1, AKR1C3, AKR1C2, EDNRB, SRD5A1, MSN, MX2, AKR1C1, NCK2, GRB10, BGN, CLIC4, TXN, RGCC, COL1A2, TFAP2B, HLA-DPA1, COL1A1, CTSB, TNC, COL3A1, SOX4, PLVAP, ABCA1, TPM1, CDH5, COL6A1, TCF4, COL4A2, COL4A1, SPARC, CAPN2, CCL18, RAB31, FABP4, CLEC7A	175	2648	16650	1.7965	0.0934912	0.00316127	0.0509889
GOTERM_BP_FAT	GO:0019748~secondary metabolic process	7	3.82514	2.78816e-05	DCT, AKR1C3, AKR1C2, TYRP1, TYR, PMEL, AKR1C1	175	57	16650	11.6842	0.0936844	0.00306927	0.0510996
GOTERM_BP_FAT	GO:0030216~keratinocyte differentiation	9	4.91803	3.54454e-05	AKR1C3, SPRR1A, CLIC4, KRT16, SPRR1B, SPRR2B, SPRR3, KRT10, CSTA	175	119	16650	7.19568	0.117551	0.00378234	0.0649578
GOTERM_BP_FAT	GO:0022617~extracellular matrix disassembly	8	4.37158	3.75855e-05	A2M, PRSS2, ELN, MMP7, CAPN2, MMP2, SPP1, FN1	175	88	16650	8.64935	0.124188	0.00389253	0.0688785
GOTERM_BP_FAT	GO:0016477~cell migration	29	15.847	3.87509e-05	ATP1B1, S100A8, ATP1B3, ENPP2, COL3A1, S100A9, GJA1, POSTN, PLVAP, SPOCK1, TPM1, EDNRB, APOE, MSN, CD24, S100A2, FN1, S100P, EFNB2, SPARC, MCAM, CCL18, NCK2, CLIC4, KRT16, PECAM1, RGCC, COL1A2, COL1A1	175	1184	16650	2.33036	0.127782	0.00389855	0.0710135
GOTERM_BP_FAT	GO:0048870~cell motility	31	16.9399	4.76963e-05	ATP1B1, PLXNC1, S100A8, ATP1B3, ENPP2, COL3A1, S100A9, GJA1, POSTN, PLVAP, SPOCK1, TPM1, EDNRB, SERPINE2, APOE, MSN, CD24, S100A2, FN1, S100P, EFNB2, SPARC, MCAM, CCL18, NCK2, CLIC4, KRT16, PECAM1, RGCC, COL1A2, COL1A1	175	1330	16650	2.21762	0.15488	0.00466344	0.0873996
GOTERM_BP_FAT	GO:0051674~localization of cell	31	16.9399	4.76963e-05	ATP1B1, PLXNC1, S100A8, ATP1B3, ENPP2, COL3A1, S100A9, GJA1, POSTN, PLVAP, SPOCK1, TPM1, EDNRB, SERPINE2, APOE, MSN, CD24, S100A2, FN1, S100P, EFNB2, SPARC, MCAM, CCL18, NCK2, CLIC4, KRT16, PECAM1, RGCC, COL1A2, COL1A1	175	1330	16650	2.21762	0.15488	0.00466344	0.0873996
GOTERM_BP_FAT	GO:0071310~cellular response to organic substance	43	23.4973	5.35638e-05	ASPN, ATP6V0E1, LTBP1, LTBP2, TNC, DICER1, DUOX2, COL3A1, SOX4, SYNCRIP, MED24, POSTN, PLVAP, ABCA1, AQP1, MMP2, CDH5, ATP2B1, AKR1C3, EDNRB, AKR1C2, COL6A1, SRD5A1, MSN, TCF4, MX2, AKR1C1, COL4A2, COL4A1, SPARC, CAPN2, CCL18, NCK2, RAB31, GRB10, BGN, COL1A2, TFAP2B, FABP4, HLA-DPA1, COL1A1, CLEC7A, CTSB	175	2186	16650	1.87152	0.172195	0.00509449	0.0981464
GOTERM_BP_FAT	GO:0048646~anatomical structure formation involved in morphogenesis	28	15.3005	6.22799e-05	DICER1, SOX4, AQP1, TPM1, MMP2, HPSE, ALDH1A3, COL6A1, TCF4, THBS2, FN1, COL4A2, COL4A1, EFNB2, SPAG1, COL15A1, ACTN1, SPARC, CAPN2, MCAM, NEBL, CLIC4, RGCC, PECAM1, MYH11, TFAP2B, COL1A1, FAIM2	175	1151	16650	2.31451	0.197265	0.00576569	0.114109
GOTERM_BP_FAT	GO:0031667~response to nutrient levels	15	8.19672	9.06045e-05	KYNU, RBP1, TNC, MMP7, POSTN, SPARC, ABCA1, AKR1C3, ATP2B1, TYMS, TYR, APOE, SRD5A1, COL1A1, SPP1	175	404	16650	3.53253	0.273609	0.00816309	0.165964
GOTERM_BP_FAT	GO:0001525~angiogenesis	15	8.19672	0.000114284	COL4A2, COL4A1, EFNB2, COL15A1, SPARC, MCAM, AQP1, MMP2, CLIC4, HPSE, PECAM1, RGCC, TCF4, THBS2, FN1	175	413	16650	3.45555	0.331833	0.0100298	0.209296
GOTERM_BP_FAT	GO:0042445~hormone metabolic process	10	5.46448	0.000121924	PCSK2, AKR1C3, AKR1C2, CPE, RBP1, DIO2, ALDH1A3, DUOX2, SRD5A1, AKR1C1	175	181	16650	5.25651	0.349604	0.0104372	0.223272
GOTERM_BP_FAT	GO:0048066~developmental pigmentation	6	3.27869	0.000126536	DCT, EDNRB, TYRP1, TYR, PMEL, RAB38	175	47	16650	12.1459	0.360102	0.0105734	0.231708
GOTERM_BP_FAT	GO:0035904~aorta development	6	3.27869	0.000140064	LTBP1, COL3A1, EFNB2, TFAP2B, SOX4, LOXL1	175	48	16650	11.8929	0.389929	0.0114268	0.256451
GOTERM_BP_FAT	GO:0060840~artery development	7	3.82514	0.000164689	LTBP1, APOE, COL3A1, EFNB2, TFAP2B, SOX4, LOXL1	175	78	16650	8.53846	0.440701	0.0131193	0.301474
GOTERM_BP_FAT	GO:0009991~response to extracellular stimulus	15	8.19672	0.000195972	KYNU, RBP1, TNC, MMP7, POSTN, SPARC, ABCA1, AKR1C3, ATP2B1, TYMS, TYR, APOE, SRD5A1, COL1A1, SPP1	175	435	16650	3.28079	0.499153	0.0152482	0.358641
GOTERM_BP_FAT	GO:0040011~locomotion	32	17.4863	0.000250526	ATP1B1, PLXNC1, S100A8, ATP1B3, ENPP2, COL3A1, S100A9, GJA1, POSTN, PLVAP, SPOCK1, TPM1, ALCAM, EDNRB, SERPINE2, APOE, MSN, CD24, S100A2, FN1, S100P, EFNB2, SPARC, MCAM, CCL18, NCK2, CLIC4, KRT16, RGCC, PECAM1, COL1A2, COL1A1	175	1530	16650	1.98992	0.58686	0.0190332	0.458264
GOTERM_BP_FAT	GO:0008544~epidermis development	12	6.55738	0.000322987	DCT, AKR1C3, SPRR1A, HPSE, CLIC4, KRT16, SPRR1B, UGCG, SPRR2B, SPRR3, KRT10, CSTA	175	300	16650	3.80571	0.68008	0.023957	0.590439
GOTERM_BP_FAT	GO:0001503~ossification	13	7.10383	0.000401957	ASPN, TNC, DUOX2, SYNCRIP, MGP, GJA1, GPM6B, SPARC, MMP2, COL6A1, COL1A1, SPP1, CDH11	175	359	16650	3.44528	0.757897	0.0291175	0.734298
GOTERM_BP_FAT	GO:0006928~movement of cell or subcellular component	35	19.1257	0.000423374	ATP1B1, PLXNC1, S100A8, ATP1B3, ENPP2, CALD1, COL3A1, S100A9, GJA1, POSTN, PLVAP, SPOCK1, TPM1, ALCAM, EDNRB, SERPINE2, APOE, MSN, CD24, S100A2, FN1, S100P, EFNB2, ACTN1, SPARC, MCAM, CCL18, NCK2, CLIC4, KRT16, RGCC, TXN, PECAM1, COL1A2, COL1A1	175	1795	16650	1.85515	0.775522	0.0300292	0.773278
GOTERM_BP_FAT	GO:0018958~phenol-containing compound metabolic process	7	3.82514	0.000429649	DCT, TYRP1, TYR, DIO2, PMEL, DUOX2, SRD5A1	175	93	16650	7.16129	0.78044	0.0298674	0.784698
GOTERM_BP_FAT	GO:0042448~progesterone metabolic process	4	2.18579	0.00046534	AKR1C3, AKR1C2, SRD5A1, AKR1C1	175	15	16650	25.3714	0.806427	0.0316852	0.84962
GOTERM_BP_FAT	GO:0043200~response to amino acid	7	3.82514	0.000509266	COL4A1, COL3A1, COL1A2, COL6A1, COL1A1, CAPN2, MMP2	175	96	16650	6.9375	0.834229	0.0339702	0.929467
GOTERM_BP_FAT	GO:0046683~response to organophosphorus	8	4.37158	0.000568413	TYMS, TYR, DUOX2, SRD5A1, COL1A1, SPARC, AQP1, AKR1C1	175	136	16650	5.59664	0.865465	0.0371405	1.03689
GOTERM_BP_FAT	GO:0009913~epidermal cell differentiation	9	4.91803	0.000572604	AKR1C3, SPRR1A, CLIC4, KRT16, SPRR1B, SPRR2B, SPRR3, KRT10, CSTA	175	178	16650	4.81059	0.867441	0.0367293	1.04449
GOTERM_BP_FAT	GO:0071395~cellular response to jasmonic acid stimulus	3	1.63934	0.000642604	AKR1C3, AKR1C2, AKR1C1	175	4	16650	71.3571	0.896464	0.0403948	1.17147
GOTERM_BP_FAT	GO:0009753~response to jasmonic acid	3	1.63934	0.000642604	AKR1C3, AKR1C2, AKR1C1	175	4	16650	71.3571	0.896464	0.0403948	1.17147
GOTERM_BP_FAT	GO:0016049~cell growth	14	7.65027	0.000681798	ATP6V0E1, PLXNC1, S100A8, S100A9, GJA1, POSTN, FRZB, ALCAM, TYMS, SERPINE2, APOE, PRSS2, FN1, SPP1	175	436	16650	3.05505	0.909843	0.0420579	1.2425
GOTERM_BP_FAT	GO:0055092~sterol homeostasis	6	3.27869	0.000720742	APOE, FABP4, CD24, ABCA1, AKR1C1, ABCG1	175	68	16650	8.39496	0.921425	0.0436451	1.31303
GOTERM_BP_FAT	GO:0042632~cholesterol homeostasis	6	3.27869	0.000720742	APOE, FABP4, CD24, ABCA1, AKR1C1, ABCG1	175	68	16650	8.39496	0.921425	0.0436451	1.31303
GOTERM_BP_FAT	GO:0042438~melanin biosynthetic process	4	2.18579	0.000815521	DCT, TYRP1, TYR, PMEL	175	18	16650	21.1429	0.943772	0.0484152	1.48448
GOTERM_BP_FAT	GO:0010951~negative regulation of endopeptidase activity	10	5.46448	0.000829461	A2M, SERPINE2, COL6A3, PI3, TFAP2B, SERPINB1, SPOCK1, SERPINB13, CSTA, AQP1	175	235	16650	4.04863	0.946472	0.0484086	1.50967
GOTERM_BP_FAT	GO:0090130~tissue migration	10	5.46448	0.000884411	S100P, APOE, ENPP2, ACTA2, KRT16, RGCC, PECAM1, EFNB2, SPARC, S100A2	175	237	16650	4.01447	0.955913	0.0506962	1.60892
GOTERM_BP_FAT	GO:0002576~platelet degranulation	7	3.82514	0.000903499	VWF, A2M, PECAM1, ACTN1, PCDH7, SPARC, FN1	175	107	16650	6.2243	0.958786	0.0509354	1.64337
GOTERM_BP_FAT	GO:0052547~regulation of peptidase activity	13	7.10383	0.000952106	A2M, S100A8, S100A9, SPOCK1, AQP1, SERPINE2, PI3, COL6A3, TFAP2B, SERPINB1, CSTA, SERPINB13, FN1	175	396	16650	3.12338	0.965287	0.0527609	1.73105
GOTERM_BP_FAT	GO:0098609~cell-cell adhesion	25	13.6612	0.00106519	S100P, S100A8, CALD1, EFNB2, S100A9, SOX4, ACTN1, PCDH7, GPRC5A, CDH5, ALCAM, NCK2, COL14A1, SERPINE2, CD93, DSG3, RGCC, CEACAM5, HLA-DPA1, CLEC7A, CSTA, CD24, MSN, TES, CDH11	175	1164	16650	2.04345	0.976716	0.0579362	1.93476
GOTERM_BP_FAT	GO:0046903~secretion	24	13.1148	0.00110517	FCER1A, A2M, S100A8, LTBP2, S100A9, HK2, SOX4, GJA1, ACTN1, POSTN, PCDH7, ABCA1, SPARC, AQP1, EDNRB, VWF, RAB31, SERPINE2, PECAM1, RGCC, TFAP2B, SLC1A1, NMU, FN1	175	1098	16650	2.07963	0.979782	0.0591353	2.00668
GOTERM_BP_FAT	GO:0006582~melanin metabolic process	4	2.18579	0.00112197	DCT, TYRP1, TYR, PMEL	175	20	16650	19.0286	0.980947	0.0591122	2.0369
GOTERM_BP_FAT	GO:0010466~negative regulation of peptidase activity	10	5.46448	0.00117431	A2M, SERPINE2, COL6A3, PI3, TFAP2B, SERPINB1, SPOCK1, SERPINB13, CSTA, AQP1	175	247	16650	3.85194	0.984163	0.0608775	2.13096
GOTERM_BP_FAT	GO:0044712~single-organism catabolic process	20	10.929	0.00122221	COL4A2, KYNU, COL4A1, GM2A, ENPP2, COL3A1, ABHD5, COL15A1, HK2, MMP7, MMP2, AKR1C3, APOE, PRSS2, COL6A3, COL1A2, FABP4, COL6A1, COL1A1, CTSB	175	837	16650	2.27343	0.986628	0.0623671	2.21695
GOTERM_BP_FAT	GO:1901615~organic hydroxy compound metabolic process	13	7.10383	0.00128148	TYRP1, RBP1, PMEL, DUOX2, ABCA1, ABCG1, DCT, AKR1C3, TYR, DIO2, APOE, ALDH1A3, SRD5A1	175	410	16650	3.01672	0.989154	0.064364	2.32327
GOTERM_BP_FAT	GO:0098602~single organism cell adhesion	19	10.3825	0.00135207	S100A8, EFNB2, S100A9, SOX4, ACTN1, POSTN, CDH5, NCK2, COL14A1, SERPINE2, CD93, RGCC, CEACAM5, HLA-DPA1, CLEC7A, CSTA, CD24, MSN, FN1	175	779	16650	2.32056	0.991548	0.0668403	2.44976
GOTERM_BP_FAT	GO:0071495~cellular response to endogenous stimulus	25	13.6612	0.00135855	ASPN, ATP6V0E1, LTBP1, LTBP2, TNC, COL3A1, MED24, POSTN, AQP1, MMP2, CDH5, AKR1C3, ATP2B1, AKR1C2, COL6A1, SRD5A1, AKR1C1, COL4A2, COL4A1, CAPN2, GRB10, RAB31, COL1A2, COL1A1, CTSB	175	1185	16650	2.00723	0.991739	0.066223	2.46136
GOTERM_BP_FAT	GO:0051248~negative regulation of protein metabolic process	23	12.5683	0.00140281	ASPN, A2M, DICER1, SOX4, SYNCRIP, SPOCK1, AQP1, GPRC5A, ITM2A, NCK2, EDNRB, BGN, SET, SERPINE2, APOE, COL6A3, PI3, TFAP2B, SERPINB1, FABP4, QKI, SERPINB13, CSTA	175	1049	16650	2.08607	0.992935	0.0673777	2.54058
GOTERM_BP_FAT	GO:0031589~cell-substrate adhesion	11	6.01093	0.00144462	VWF, HPSE, PECAM1, COL3A1, ACTN1, POSTN, GPM6B, SPOCK1, COL1A1, FN1, MUC4	175	306	16650	3.42017	0.993905	0.0683869	2.61536
GOTERM_BP_FAT	GO:0010817~regulation of hormone levels	14	7.65027	0.00148397	RBP1, DUOX2, GJA1, SOX4, AKR1C3, PCSK2, AKR1C2, DIO2, CPE, ALDH1A3, TFAP2B, SRD5A1, AKR1C1, NMU	175	475	16650	2.80421	0.994696	0.0692566	2.68568
GOTERM_BP_FAT	GO:0010243~response to organonitrogen compound	19	10.3825	0.00155768	ATP6V0E1, KYNU, COL4A1, COL3A1, DUOX2, GJA1, SPARC, CAPN2, AQP1, MMP2, TYMS, GRB10, RAB31, TYR, COL1A2, COL6A1, SRD5A1, COL1A1, TFF1	175	789	16650	2.29115	0.995912	0.0716267	2.81729
GOTERM_BP_FAT	GO:0002138~retinoic acid biosynthetic process	3	1.63934	0.0015845	AKR1C3, RBP1, ALDH1A3	175	6	16650	47.5714	0.996282	0.0718798	2.86513
GOTERM_BP_FAT	GO:0071798~response to prostaglandin D	3	1.63934	0.0015845	AKR1C3, AKR1C2, TNC	175	6	16650	47.5714	0.996282	0.0718798	2.86513
GOTERM_BP_FAT	GO:0071799~cellular response to prostaglandin D stimulus	3	1.63934	0.0015845	AKR1C3, AKR1C2, TNC	175	6	16650	47.5714	0.996282	0.0718798	2.86513
GOTERM_BP_FAT	GO:0032269~negative regulation of cellular protein metabolic process	22	12.0219	0.00161282	ASPN, A2M, DICER1, SOX4, SYNCRIP, SPOCK1, AQP1, GPRC5A, NCK2, EDNRB, BGN, SET, SERPINE2, APOE, COL6A3, PI3, TFAP2B, SERPINB1, FABP4, QKI, SERPINB13, CSTA	175	992	16650	2.11002	0.996636	0.0721908	2.91562
GOTERM_BP_FAT	GO:0008283~cell proliferation	34	18.5792	0.00161677	HIST1H2AC, KRT6A, MARCKSL1, TNC, ELN, DICER1, GJA1, SOX4, AQP1, TPM1, MMP2, CDH5, DCT, AKR1C3, EDNRB, AKR1C2, TYMS, TYR, SERPINE2, APOE, HPSE, TFF1, CD24, TES, FN1, EFNB2, SPARC, FRZB, NCK2, KRT16, RGCC, TXN, TFAP2B, HLA-DPA1	175	1861	16650	1.73824	0.996683	0.0714557	2.92266
GOTERM_BP_FAT	GO:0071295~cellular response to vitamin	4	2.18579	0.00170336	ATP2B1, TNC, POSTN, COL1A1	175	23	16650	16.5466	0.997557	0.074212	3.0769
GOTERM_BP_FAT	GO:0071560~cellular response to transforming growth factor beta stimulus	9	4.91803	0.00181799	ASPN, COL4A2, LTBP1, LTBP2, COL3A1, COL1A2, POSTN, COL1A1, CDH5	175	213	16650	4.02012	0.998371	0.0780481	3.28071
GOTERM_BP_FAT	GO:0031424~keratinization	5	2.73224	0.00182452	SPRR1A, KRT16, SPRR1B, SPRR2B, SPRR3	175	50	16650	9.51429	0.998408	0.077377	3.2923
GOTERM_BP_FAT	GO:0052548~regulation of endopeptidase activity	12	6.55738	0.00187397	A2M, S100A8, SERPINE2, COL6A3, PI3, S100A9, TFAP2B, SERPINB1, SPOCK1, SERPINB13, CSTA, AQP1	175	372	16650	3.06912	0.998663	0.0784503	3.3801
GOTERM_BP_FAT	GO:0071559~response to transforming growth factor beta	9	4.91803	0.00192887	ASPN, COL4A2, LTBP1, LTBP2, COL3A1, COL1A2, POSTN, COL1A1, CDH5	175	215	16650	3.98272	0.998899	0.0797118	3.47747
GOTERM_BP_FAT	GO:0050900~leukocyte migration	12	6.55738	0.00203724	EDNRB, ATP1B1, S100A8, ATP1B3, PECAM1, S100A9, COL1A2, PLVAP, COL1A1, MSN, CCL18, FN1	175	376	16650	3.03647	0.999249	0.0830325	3.66941
GOTERM_BP_FAT	GO:0048468~cell development	35	19.1257	0.00210627	PLXNC1, S100A8, TNC, COL3A1, DICER1, S100A9, GJA1, SOX4, SPOCK1, POSTN, TPM1, CDH5, DCT, ALCAM, TYMS, EDNRB, SERPINE2, APOE, QKI, MSN, TCF4, SPP1, FN1, ACTA2, EFNB2, ACTN1, FRZB, NEBL, NCK2, CLIC4, RGCC, PECAM1, MYH11, COL1A1, CDH11	175	1968	16650	1.69207	0.999412	0.0847485	3.79148
GOTERM_BP_FAT	GO:0044550~secondary metabolite biosynthetic process	4	2.18579	0.00217854	DCT, TYRP1, TYR, PMEL	175	25	16650	15.2229	0.999545	0.0865446	3.91913
GOTERM_BP_FAT	GO:0030334~regulation of cell migration	17	9.28962	0.00224465	PLXNC1, ENPP2, COL3A1, PLVAP, POSTN, SPARC, MCAM, TPM1, SERPINE2, APOE, KRT16, CLIC4, PECAM1, RGCC, COL1A1, MSN, FN1	175	685	16650	2.36121	0.99964	0.0880648	4.03577
GOTERM_BP_FAT	GO:1901698~response to nitrogen compound	20	10.929	0.0026158	ATP6V0E1, KYNU, COL4A1, COL3A1, DUOX2, DICER1, GJA1, SPARC, CAPN2, AQP1, MMP2, TYMS, GRB10, RAB31, TYR, COL1A2, COL6A1, SRD5A1, COL1A1, TFF1	175	895	16650	2.1261	0.999903	0.100768	4.68806
GOTERM_BP_FAT	GO:0010631~epithelial cell migration	9	4.91803	0.00277215	S100P, APOE, ENPP2, KRT16, RGCC, PECAM1, EFNB2, SPARC, S100A2	175	228	16650	3.75564	0.999944	0.105323	4.96158
GOTERM_BP_FAT	GO:0031214~biomineral tissue development	7	3.82514	0.00284951	ASPN, DUOX2, MGP, GJA1, GPM6B, COL1A1, SPP1	175	134	16650	4.97015	0.999958	0.106954	5.09664
GOTERM_BP_FAT	GO:0040012~regulation of locomotion	18	9.83607	0.00287196	PLXNC1, ENPP2, COL3A1, EFNB2, PLVAP, POSTN, SPARC, MCAM, TPM1, SERPINE2, APOE, KRT16, CLIC4, PECAM1, RGCC, COL1A1, MSN, FN1	175	768	16650	2.22991	0.999961	0.10662	5.13581
GOTERM_BP_FAT	GO:0030638~polyketide metabolic process	3	1.63934	0.00291728	AKR1C3, AKR1C2, AKR1C1	175	8	16650	35.6786	0.999967	0.107087	5.21482
GOTERM_BP_FAT	GO:0044598~doxorubicin metabolic process	3	1.63934	0.00291728	AKR1C3, AKR1C2, AKR1C1	175	8	16650	35.6786	0.999967	0.107087	5.21482
GOTERM_BP_FAT	GO:0044597~daunorubicin metabolic process	3	1.63934	0.00291728	AKR1C3, AKR1C2, AKR1C1	175	8	16650	35.6786	0.999967	0.107087	5.21482
GOTERM_BP_FAT	GO:0048844~artery morphogenesis	5	2.73224	0.00295735	APOE, COL3A1, EFNB2, TFAP2B, SOX4	175	57	16650	8.34586	0.999971	0.107364	5.28462
GOTERM_BP_FAT	GO:0042127~regulation of cell proliferation	29	15.847	0.00297532	HIST1H2AC, KRT6A, MARCKSL1, TNC, DICER1, SOX4, GJA1, AQP1, TPM1, MMP2, CDH5, DCT, AKR1C3, EDNRB, AKR1C2, SERPINE2, HPSE, APOE, TFF1, CD24, FN1, TES, EFNB2, SPARC, FRZB, NCK2, RGCC, TFAP2B, HLA-DPA1	175	1552	16650	1.7778	0.999973	0.106884	5.31592
GOTERM_BP_FAT	GO:0090132~epithelium migration	9	4.91803	0.00300257	S100P, APOE, ENPP2, KRT16, RGCC, PECAM1, EFNB2, SPARC, S100A2	175	231	16650	3.70686	0.999975	0.106726	5.36334
GOTERM_BP_FAT	GO:0043473~pigmentation	6	3.27869	0.00319664	DCT, EDNRB, TYRP1, TYR, PMEL, RAB38	175	95	16650	6.00902	0.999988	0.112106	5.70046
GOTERM_BP_FAT	GO:0007266~Rho protein signal transduction	6	3.27869	0.00319664	APOE, PECAM1, COL3A1, COL1A2, ABCA1, CDC42EP3	175	95	16650	6.00902	0.999988	0.112106	5.70046
GOTERM_BP_FAT	GO:0007596~blood coagulation	11	6.01093	0.00324104	VWF, A2M, SERPINE2, APOE, HPSE, COL3A1, S100A9, COL1A2, ACTN1, TSPAN8, COL1A1	175	342	16650	3.06015	0.999989	0.11246	5.77744
GOTERM_BP_FAT	GO:0016101~diterpenoid metabolic process	6	3.27869	0.00334429	AKR1C3, RBP1, APOE, ALDH1A3, SRD5A1, AKR1C1	175	96	16650	5.94643	0.999993	0.11471	5.9562
GOTERM_BP_FAT	GO:0035909~aorta morphogenesis	4	2.18579	0.00335678	COL3A1, EFNB2, TFAP2B, SOX4	175	29	16650	13.1232	0.999993	0.114008	5.9778
GOTERM_BP_FAT	GO:0008285~negative regulation of cell proliferation	16	8.74317	0.0034858	HIST1H2AC, DICER1, EFNB2, GJA1, SOX4, SPARC, FRZB, TPM1, CDH5, NCK2, SERPINE2, APOE, RGCC, TFAP2B, TFF1, TES	175	651	16650	2.33838	0.999996	0.117007	6.20068
GOTERM_BP_FAT	GO:0019915~lipid storage	5	2.73224	0.00356354	GM2A, APOE, ABHD5, ABCA1, ABCG1	175	60	16650	7.92857	0.999997	0.118338	6.33473
GOTERM_BP_FAT	GO:0009725~response to hormone	19	10.3825	0.00364927	ATP6V0E1, TNC, GJA1, MED24, SPARC, AQP1, ABCG1, AKR1C3, ATP2B1, AKR1C2, TYMS, GRB10, RAB31, SRD5A1, COL1A1, TFF1, CTSB, AKR1C1, SPP1	175	854	16650	2.11676	0.999997	0.119887	6.48235
GOTERM_BP_FAT	GO:0051591~response to cAMP	6	3.27869	0.00365424	TYR, DUOX2, SRD5A1, COL1A1, SPARC, AQP1	175	98	16650	5.82507	0.999998	0.118936	6.4909
GOTERM_BP_FAT	GO:0033280~response to vitamin D	4	2.18579	0.00370138	ATP2B1, TYR, TNC, SPP1	175	30	16650	12.6857	0.999998	0.119281	6.57197
GOTERM_BP_FAT	GO:0030647~aminoglycoside antibiotic metabolic process	3	1.63934	0.00372508	AKR1C3, AKR1C2, AKR1C1	175	9	16650	31.7143	0.999998	0.118916	6.61271
GOTERM_BP_FAT	GO:0016102~diterpenoid biosynthetic process	3	1.63934	0.00372508	AKR1C3, RBP1, ALDH1A3	175	9	16650	31.7143	0.999998	0.118916	6.61271
GOTERM_BP_FAT	GO:0016337~single organismal cell-cell adhesion	17	9.28962	0.00391556	S100A8, EFNB2, S100A9, SOX4, ACTN1, CDH5, NCK2, COL14A1, SERPINE2, CD93, RGCC, CEACAM5, HLA-DPA1, CLEC7A, CD24, MSN, CSTA	175	725	16650	2.23094	0.999999	0.123502	6.93947
GOTERM_BP_FAT	GO:0055067~monovalent inorganic cation homeostasis	7	3.82514	0.00392124	EDNRB, ATP1B1, ATP6V0E1, ATP1B3, CLIC4, TFAP2B, RAB38	175	143	16650	4.65734	0.999999	0.122578	6.94919
GOTERM_BP_FAT	GO:0033993~response to lipid	19	10.3825	0.00392549	S100A8, RBP1, TNC, MED24, POSTN, SPARC, ABCA1, AQP1, ABCG1, AKR1C3, ATP2B1, EDNRB, TYMS, TYR, SRD5A1, COL1A1, MSN, LOXL1, SPP1	175	860	16650	2.10199	0.999999	0.121629	6.95648
GOTERM_BP_FAT	GO:0007160~cell-matrix adhesion	8	4.37158	0.00409545	HPSE, PECAM1, COL3A1, ACTN1, POSTN, GPM6B, FN1, MUC4	175	192	16650	3.96429	0.999999	0.125462	7.24709
GOTERM_BP_FAT	GO:0051270~regulation of cellular component movement	18	9.83607	0.00444366	PLXNC1, ENPP2, COL3A1, ACTN1, PLVAP, POSTN, SPARC, MCAM, TPM1, SERPINE2, APOE, KRT16, CLIC4, PECAM1, RGCC, COL1A1, MSN, FN1	175	802	16650	2.13538	1	0.134241	7.83979
GOTERM_BP_FAT	GO:0001937~negative regulation of endothelial cell proliferation	4	2.18579	0.0044534	APOE, RGCC, GJA1, SPARC	175	32	16650	11.8929	1	0.133377	7.85631
GOTERM_BP_FAT	GO:0007599~hemostasis	11	6.01093	0.00446935	VWF, A2M, SERPINE2, APOE, HPSE, COL3A1, S100A9, COL1A2, ACTN1, TSPAN8, COL1A1	175	358	16650	2.92338	1	0.132701	7.88337
GOTERM_BP_FAT	GO:0050817~coagulation	11	6.01093	0.00446935	VWF, A2M, SERPINE2, APOE, HPSE, COL3A1, S100A9, COL1A2, ACTN1, TSPAN8, COL1A1	175	358	16650	2.92338	1	0.132701	7.88337
GOTERM_BP_FAT	GO:1903034~regulation of response to wounding	7	3.82514	0.00448534	SERPINE2, APOE, HPSE, S100A9, GJA1, TSPAN8, SPP1	175	147	16650	4.53061	1	0.132037	7.91049
GOTERM_BP_FAT	GO:2000145~regulation of cell motility	17	9.28962	0.00452241	PLXNC1, ENPP2, COL3A1, PLVAP, POSTN, SPARC, MCAM, TPM1, SERPINE2, APOE, KRT16, CLIC4, PECAM1, RGCC, COL1A1, MSN, FN1	175	736	16650	2.19759	1	0.131958	7.97334
GOTERM_BP_FAT	GO:0008207~C21-steroid hormone metabolic process	4	2.18579	0.00486152	AKR1C3, AKR1C2, SRD5A1, AKR1C1	175	33	16650	11.5325	1	0.139996	8.54633
GOTERM_BP_FAT	GO:0006721~terpenoid metabolic process	6	3.27869	0.00510199	AKR1C3, RBP1, APOE, ALDH1A3, SRD5A1, AKR1C1	175	106	16650	5.38544	1	0.145228	8.9506
GOTERM_BP_FAT	GO:0009612~response to mechanical stimulus	8	4.37158	0.00525425	SERPINE2, TNC, COL3A1, MMP7, GJA1, POSTN, COL1A1, AQP1	175	201	16650	3.78678	1	0.148046	9.20569
GOTERM_BP_FAT	GO:0031670~cellular response to nutrient	4	2.18579	0.00529151	ATP2B1, TNC, POSTN, COL1A1	175	34	16650	11.1933	1	0.147842	9.26803
GOTERM_BP_FAT	GO:0034754~cellular hormone metabolic process	6	3.27869	0.0053078	AKR1C3, AKR1C2, RBP1, ALDH1A3, SRD5A1, AKR1C1	175	107	16650	5.33511	1	0.147103	9.29526
GOTERM_BP_FAT	GO:0001501~skeletal system development	13	7.10383	0.00545922	TYMS, COL3A1, COL1A2, MGP, SOX4, POSTN, SRD5A1, COL1A1, SPARC, FRZB, MMP2, PITX1, CDH11	175	490	16650	2.5242	1	0.149808	9.54804
GOTERM_BP_FAT	GO:0007399~nervous system development	36	19.6721	0.00553312	PLXNC1, S100A8, TNC, S100A9, DUOX2, COL3A1, DICER1, GJA1, SOX4, SPOCK1, GPM6B, POSTN, AQP1, ITM2A, ATP2B1, PCSK2, DCT, ALCAM, EDNRB, SERPINE2, APOE, ALDH1A3, QKI, SRD5A1, TCF4, THBS2, PITX1, SPP1, FN1, COL4A1, EFNB2, MAL, NCK2, TFAP2B, FAIM2, CDH11	175	2170	16650	1.57841	1	0.150515	9.67118
GOTERM_BP_FAT	GO:1903035~negative regulation of response to wounding	5	2.73224	0.00558018	SERPINE2, APOE, GJA1, TSPAN8, SPP1	175	68	16650	6.9958	1	0.150542	9.74951
GOTERM_BP_FAT	GO:0016114~terpenoid biosynthetic process	3	1.63934	0.00561346	AKR1C3, RBP1, ALDH1A3	175	11	16650	25.9481	1	0.150228	9.80485
GOTERM_BP_FAT	GO:0043542~endothelial cell migration	7	3.82514	0.00561385	S100P, APOE, RGCC, PECAM1, EFNB2, SPARC, S100A2	175	154	16650	4.32468	1	0.149113	9.80551
GOTERM_BP_FAT	GO:0071496~cellular response to external stimulus	9	4.91803	0.00572226	AKR1C3, ATP2B1, TNC, MMP7, GJA1, POSTN, SRD5A1, COL1A1, AQP1	175	257	16650	3.33185	1	0.150642	9.98559
GOTERM_BP_FAT	GO:0003014~renal system process	6	3.27869	0.00573693	AKR1C3, EDNRB, TFAP2B, GJA1, MCAM, AQP1	175	109	16650	5.23722	1	0.149886	10.0099
GOTERM_BP_FAT	GO:0048871~multicellular organismal homeostasis	10	5.46448	0.00620173	EDNRB, KRT16, TFAP2B, PIP, LYZ, TFF1, MUC5AC, AQP1, SPP1, MUC4	175	317	16650	3.00135	1	0.159862	10.778
GOTERM_BP_FAT	GO:0045861~negative regulation of proteolysis	10	5.46448	0.00620173	A2M, SERPINE2, COL6A3, PI3, TFAP2B, SERPINB1, SPOCK1, SERPINB13, CSTA, AQP1	175	317	16650	3.00135	1	0.159862	10.778
GOTERM_BP_FAT	GO:0031960~response to corticosteroid	7	3.82514	0.00634407	AKR1C3, ATP2B1, TYMS, SRD5A1, COL1A1, SPARC, AQP1	175	158	16650	4.21519	1	0.16205	11.012
GOTERM_BP_FAT	GO:0019725~cellular homeostasis	18	9.83607	0.00643851	ATP1B1, ATP6V0E1, S100A8, ATP1B3, S100A9, HK2, SOX4, GJA1, AQP1, ATP2B1, EDNRB, DIO2, APOE, CLIC4, TXN, TFAP2B, CD24, RAB38	175	833	16650	2.05591	1	0.163087	11.1669
GOTERM_BP_FAT	GO:0001667~ameboidal-type cell migration	10	5.46448	0.00657385	EDNRB, S100P, APOE, ENPP2, KRT16, RGCC, PECAM1, EFNB2, SPARC, S100A2	175	320	16650	2.97321	1	0.165048	11.3885
GOTERM_BP_FAT	GO:0042592~homeostatic process	29	15.847	0.00662703	ATP1B1, ATP6V0E1, S100A8, ATP1B3, S100A9, HK2, SOX4, GJA1, ABCA1, AQP1, ATP2B1, EDNRB, APOE, PIP, CD24, TFF1, AKR1C1, SPP1, LYZ, ABCG1, MUC4, DIO2, CLIC4, KRT16, TXN, TFAP2B, FABP4, MUC5AC, RAB38	175	1645	16650	1.67729	1	0.165102	11.4754
GOTERM_BP_FAT	GO:0014070~response to organic cyclic compound	19	10.3825	0.00667364	KYNU, TNC, DUOX2, DICER1, MED24, POSTN, SPARC, ABCA1, AQP1, AKR1C3, ATP2B1, EDNRB, TYMS, TYR, LY6D, SRD5A1, COL1A1, MSN, SPP1	175	906	16650	1.99527	1	0.165007	11.5515
GOTERM_BP_FAT	GO:0042574~retinal metabolic process	3	1.63934	0.0066901	AKR1C3, ALDH1A3, AKR1C1	175	12	16650	23.7857	1	0.164236	11.5784
GOTERM_BP_FAT	GO:0043206~extracellular fibril organization	3	1.63934	0.0066901	LTBP2, COL3A1, MUC5AC	175	12	16650	23.7857	1	0.164236	11.5784
GOTERM_BP_FAT	GO:0048878~chemical homeostasis	21	11.4754	0.00671495	ATP1B1, ATP6V0E1, S100A8, ATP1B3, S100A9, HK2, SOX4, GJA1, ABCA1, AQP1, ABCG1, ATP2B1, EDNRB, CLIC4, APOE, KRT16, TFAP2B, FABP4, RAB38, CD24, AKR1C1	175	1049	16650	1.90467	1	0.163663	11.6189
GOTERM_BP_FAT	GO:0070848~response to growth factor	15	8.19672	0.00680322	ASPN, COL4A2, LTBP1, LTBP2, TNC, COL3A1, POSTN, SPARC, CDH5, GRB10, TFAP2B, COL1A2, SRD5A1, COL1A1, TCF4	175	634	16650	2.25101	1	0.164504	11.7628
GOTERM_BP_FAT	GO:0030168~platelet activation	7	3.82514	0.00693614	VWF, SERPINE2, APOE, COL3A1, COL1A2, ACTN1, COL1A1	175	161	16650	4.13665	1	0.166312	11.979
GOTERM_BP_FAT	GO:0001775~cell activation	19	10.3825	0.00697276	FCER1A, COL3A1, EFNB2, SOX4, ACTN1, ITM2A, VWF, NCK2, LY6D, SERPINE2, CD93, APOE, RGCC, COL1A2, HLA-DPA1, COL1A1, CLEC7A, CD24, TCF4	175	910	16650	1.9865	1	0.165995	12.0385
GOTERM_BP_FAT	GO:0006954~inflammatory response	15	8.19672	0.00707953	FCER1A, A2M, S100A8, S100A9, LYZ, GJA1, CCL18, EDNRB, APOE, KRT16, FABP4, CLEC7A, SPP1, FN1, PNMA1	175	637	16650	2.24041	1	0.167198	12.2117
GOTERM_BP_FAT	GO:0046189~phenol-containing compound biosynthetic process	4	2.18579	0.00723607	DCT, TYRP1, TYR, PMEL	175	38	16650	10.015	1	0.169448	12.4651
GOTERM_BP_FAT	GO:0007586~digestion	7	3.82514	0.00737137	AKR1C2, PRSS2, TFF1, AQP1, NMU, AKR1C1, MUC4	175	163	16650	4.08589	1	0.171209	12.6835
GOTERM_BP_FAT	GO:0051240~positive regulation of multicellular organismal process	26	14.2077	0.00751472	ENPP2, DICER1, S100A9, GJA1, POSTN, GPM6B, AQP1, TPM1, DCT, EDNRB, SERPINE2, HPSE, APOE, CD24, TCF4, SLC1A1, THBS2, NMU, SPP1, FN1, FCER1A, EFNB2, SPARC, RGCC, HLA-DPA1, COL1A1	175	1431	16650	1.72866	1	0.173112	12.9144
GOTERM_BP_FAT	GO:1901617~organic hydroxy compound biosynthetic process	7	3.82514	0.00756844	DCT, AKR1C3, TYRP1, TYR, APOE, PMEL, ABCG1	175	164	16650	4.06098	1	0.173117	13.0008
GOTERM_BP_FAT	GO:0009887~organ morphogenesis	20	10.929	0.00782072	ASPN, ACTA2, TNC, COL3A1, DUOX2, ELN, EFNB2, SOX4, MGP, GJA1, FRZB, AQP1, TPM1, MMP2, CPE, ALDH1A3, COL1A2, TFAP2B, COL1A1, MSN	175	992	16650	1.9182	1	0.177223	13.4053
GOTERM_BP_FAT	GO:1901655~cellular response to ketone	5	2.73224	0.00787313	ATP2B1, POSTN, SRD5A1, MSN, AQP1	175	75	16650	6.34286	1	0.177173	13.4891
GOTERM_BP_FAT	GO:0016525~negative regulation of angiogenesis	5	2.73224	0.00787313	COL4A2, RGCC, SPARC, TCF4, THBS2	175	75	16650	6.34286	1	0.177173	13.4891
GOTERM_BP_FAT	GO:0055082~cellular chemical homeostasis	16	8.74317	0.00791426	ATP1B1, ATP6V0E1, S100A8, ATP1B3, S100A9, HK2, GJA1, SOX4, AQP1, ATP2B1, EDNRB, APOE, CLIC4, TFAP2B, CD24, RAB38	175	713	16650	2.13504	1	0.176894	13.5548
GOTERM_BP_FAT	GO:0030199~collagen fibril organization	4	2.18579	0.00834684	COL14A1, COL3A1, COL1A2, COL1A1	175	40	16650	9.51429	1	0.184488	14.2432
GOTERM_BP_FAT	GO:2000181~negative regulation of blood vessel morphogenesis	5	2.73224	0.00862647	COL4A2, RGCC, SPARC, TCF4, THBS2	175	77	16650	6.17811	1	0.188895	14.6854
GOTERM_BP_FAT	GO:0061061~muscle structure development	14	7.65027	0.00902702	EDNRB, TAGLN, COL3A1, EFNB2, COL6A3, ELN, MYH11, GJA1, QKI, CEACAM5, CAPN2, TPM1, PITX1, NEBL	175	589	16650	2.26146	1	0.195579	15.3151
GOTERM_BP_FAT	GO:0010875~positive regulation of cholesterol efflux	3	1.63934	0.00909869	APOE, ABCA1, ABCG1	175	14	16650	20.3878	1	0.195783	15.4273
GOTERM_BP_FAT	GO:0033700~phospholipid efflux	3	1.63934	0.00909869	APOE, ABCA1, ABCG1	175	14	16650	20.3878	1	0.195783	15.4273
GOTERM_BP_FAT	GO:0070208~protein heterotrimerization	3	1.63934	0.00909869	COL1A2, COL6A1, COL1A1	175	14	16650	20.3878	1	0.195783	15.4273
GOTERM_BP_FAT	GO:0055088~lipid homeostasis	6	3.27869	0.00976358	APOE, FABP4, CD24, ABCA1, AKR1C1, ABCG1	175	124	16650	4.60369	1	0.207305	16.4616
GOTERM_BP_FAT	GO:0001558~regulation of cell growth	11	6.01093	0.00994927	PLXNC1, S100A8, SERPINE2, APOE, PRSS2, S100A9, GJA1, SPOCK1, FRZB, SPP1, FN1	175	403	16650	2.59695	1	0.20957	16.7483
GOTERM_BP_FAT	GO:0032268~regulation of cellular protein metabolic process	37	20.2186	0.0105936	ASPN, A2M, S100A8, ENPP2, S100A9, DICER1, SOX4, SYNCRIP, SPOCK1, AQP1, GPRC5A, TYMS, EDNRB, SET, SERPINE2, APOE, COL6A3, QKI, SERPINB13, MSN, CD24, FN1, FCER1A, TPD52L1, CCL18, NCK2, BGN, DIO2, PI3, RGCC, TXN, PECAM1, TFAP2B, SERPINB1, FABP4, CTSC, CSTA	175	2346	16650	1.50055	1	0.22029	17.736
GOTERM_BP_FAT	GO:0051246~regulation of protein metabolic process	39	21.3115	0.0107271	ASPN, A2M, S100A8, ENPP2, S100A9, DICER1, GJA1, SOX4, SYNCRIP, SPOCK1, AQP1, GPRC5A, ITM2A, TYMS, EDNRB, SET, SERPINE2, APOE, COL6A3, QKI, SERPINB13, MSN, CD24, FN1, FCER1A, TPD52L1, CCL18, NCK2, BGN, DIO2, PI3, RGCC, TXN, PECAM1, TFAP2B, SERPINB1, FABP4, CTSC, CSTA	175	2512	16650	1.47714	1	0.221454	17.9392
GOTERM_BP_FAT	GO:0051093~negative regulation of developmental process	16	8.74317	0.0107736	ASPN, COL4A2, DICER1, COL3A1, GJA1, POSTN, SPOCK1, SPARC, FRZB, EDNRB, APOE, RGCC, CEACAM5, TCF4, THBS2, SPP1	175	739	16650	2.05993	1	0.221024	18.0098
GOTERM_BP_FAT	GO:0045055~regulated exocytosis	9	4.91803	0.0109297	FCER1A, VWF, A2M, RAB31, PECAM1, ACTN1, PCDH7, SPARC, FN1	175	288	16650	2.97321	1	0.222575	18.2467
GOTERM_BP_FAT	GO:0061041~regulation of wound healing	6	3.27869	0.0110996	SERPINE2, APOE, HPSE, S100A9, GJA1, TSPAN8	175	128	16650	4.45982	1	0.224351	18.5038
GOTERM_BP_FAT	GO:0006720~isoprenoid metabolic process	6	3.27869	0.0110996	AKR1C3, RBP1, APOE, ALDH1A3, SRD5A1, AKR1C1	175	128	16650	4.45982	1	0.224351	18.5038
GOTERM_BP_FAT	GO:1901343~negative regulation of vasculature development	5	2.73224	0.0111646	COL4A2, RGCC, SPARC, TCF4, THBS2	175	83	16650	5.7315	1	0.22424	18.6019
GOTERM_BP_FAT	GO:0009628~response to abiotic stimulus	20	10.929	0.011288	ATP1B1, TNC, COL3A1, KIAA0101, MMP7, GJA1, POSTN, SPARC, CAPN2, AQP1, MMP2, ATP2B1, TYR, SERPINE2, TXN, RGCC, COL1A1, SERPINB13, CD24, NMU	175	1029	16650	1.84923	1	0.22516	18.7878
GOTERM_BP_FAT	GO:0051235~maintenance of location	9	4.91803	0.0113119	LTBP1, S100A8, GM2A, APOE, ABHD5, S100A9, HK2, ABCA1, ABCG1	175	290	16650	2.95271	1	0.224327	18.8239
GOTERM_BP_FAT	GO:0010942~positive regulation of cell death	14	7.65027	0.0114092	AKR1C3, NCK2, S100A8, APOE, ALDH1A3, S100A9, RGCC, TFAP2B, SOX4, CTSC, MAL, TPD52L1, FRZB, PNMA1	175	607	16650	2.1944	1	0.224781	18.9702
GOTERM_BP_FAT	GO:0035987~endodermal cell differentiation	4	2.18579	0.0115418	COL4A2, COL6A1, MMP2, FN1	175	45	16650	8.45714	1	0.225841	19.1693
GOTERM_BP_FAT	GO:0030193~regulation of blood coagulation	5	2.73224	0.0116295	SERPINE2, APOE, HPSE, S100A9, TSPAN8	175	84	16650	5.66327	1	0.226114	19.3006
GOTERM_BP_FAT	GO:1900046~regulation of hemostasis	5	2.73224	0.0116295	SERPINE2, APOE, HPSE, S100A9, TSPAN8	175	84	16650	5.66327	1	0.226114	19.3006
GOTERM_BP_FAT	GO:0071417~cellular response to organonitrogen compound	12	6.55738	0.0117195	ATP6V0E1, GRB10, RAB31, COL4A1, COL3A1, COL1A2, COL6A1, SRD5A1, COL1A1, CAPN2, AQP1, MMP2	175	477	16650	2.39353	1	0.226424	19.4352
GOTERM_BP_FAT	GO:0016137~glycoside metabolic process	3	1.63934	0.0118353	AKR1C3, AKR1C2, AKR1C1	175	16	16650	17.8393	1	0.227167	19.608
GOTERM_BP_FAT	GO:0071363~cellular response to growth factor stimulus	14	7.65027	0.0118498	ASPN, COL4A2, LTBP1, LTBP2, COL3A1, POSTN, SPARC, CDH5, GRB10, TFAP2B, COL1A2, SRD5A1, COL1A1, TCF4	175	610	16650	2.18361	1	0.226197	19.6297
GOTERM_BP_FAT	GO:0055078~sodium ion homeostasis	4	2.18579	0.0122539	EDNRB, ATP1B1, ATP1B3, TFAP2B	175	46	16650	8.27329	1	0.231742	20.2301
GOTERM_BP_FAT	GO:0032940~secretion by cell	19	10.3825	0.0124312	FCER1A, A2M, LTBP2, SOX4, GJA1, ACTN1, POSTN, PCDH7, SPARC, ABCA1, VWF, RAB31, SERPINE2, PECAM1, RGCC, TFAP2B, SLC1A1, NMU, FN1	175	966	16650	1.87134	1	0.233451	20.4921
GOTERM_BP_FAT	GO:0051047~positive regulation of secretion	10	5.46448	0.0124659	FCER1A, EDNRB, S100A8, RGCC, S100A9, SOX4, GJA1, POSTN, AQP1, NMU	175	355	16650	2.68008	1	0.232799	20.5433
GOTERM_BP_FAT	GO:0022600~digestive system process	5	2.73224	0.0125962	TFF1, AQP1, NMU, AKR1C1, MUC4	175	86	16650	5.53156	1	0.233714	20.7353
GOTERM_BP_FAT	GO:0090066~regulation of anatomical structure size	12	6.55738	0.0129502	EDNRB, NCK2, PLXNC1, APOE, ACTA2, ELN, GJA1, MSN, AQP1, CDC42EP3, SPP1, FN1	175	484	16650	2.35891	1	0.23823	21.2546
GOTERM_BP_FAT	GO:0032376~positive regulation of cholesterol transport	3	1.63934	0.013322	APOE, ABCA1, ABCG1	175	17	16650	16.7899	1	0.242952	21.7966
GOTERM_BP_FAT	GO:0010888~negative regulation of lipid storage	3	1.63934	0.013322	ABHD5, ABCA1, ABCG1	175	17	16650	16.7899	1	0.242952	21.7966
GOTERM_BP_FAT	GO:0032373~positive regulation of sterol transport	3	1.63934	0.013322	APOE, ABCA1, ABCG1	175	17	16650	16.7899	1	0.242952	21.7966
GOTERM_BP_FAT	GO:0048729~tissue morphogenesis	14	7.65027	0.013746	KRT6A, COL4A1, ACTA2, TNC, COL3A1, EFNB2, GJA1, SOX4, FRZB, TPM1, KRT16, CLIC4, ALDH1A3, MSN	175	622	16650	2.14148	1	0.248414	22.4104
GOTERM_BP_FAT	GO:0001523~retinoid metabolic process	5	2.73224	0.0141401	AKR1C3, RBP1, APOE, ALDH1A3, AKR1C1	175	89	16650	5.3451	1	0.253312	22.9768
GOTERM_BP_FAT	GO:0050818~regulation of coagulation	5	2.73224	0.0141401	SERPINE2, APOE, HPSE, S100A9, TSPAN8	175	89	16650	5.3451	1	0.253312	22.9768
GOTERM_BP_FAT	GO:1901699~cellular response to nitrogen compound	13	7.10383	0.0143926	ATP6V0E1, COL4A1, DICER1, COL3A1, CAPN2, AQP1, MMP2, RAB31, GRB10, COL1A2, COL6A1, SRD5A1, COL1A1	175	558	16650	2.21659	1	0.255946	23.3376
GOTERM_BP_FAT	GO:1901342~regulation of vasculature development	8	4.37158	0.0146529	COL4A2, ENPP2, RGCC, EFNB2, SPARC, TCF4, AQP1, THBS2	175	245	16650	3.10671	1	0.258661	23.7079
GOTERM_BP_FAT	GO:0043086~negative regulation of catalytic activity	17	9.28962	0.0148171	ASPN, A2M, SPOCK1, AQP1, GPRC5A, EDNRB, BGN, SET, SERPINE2, APOE, COL6A3, PI3, TFAP2B, SERPINB1, FABP4, SERPINB13, CSTA	175	839	16650	1.92781	1	0.259883	23.9406
GOTERM_BP_FAT	GO:0043691~reverse cholesterol transport	3	1.63934	0.0148853	APOE, ABCA1, ABCG1	175	18	16650	15.8571	1	0.259645	24.0371
GOTERM_BP_FAT	GO:0007620~copulation	3	1.63934	0.0148853	EDNRB, SERPINE2, PI3	175	18	16650	15.8571	1	0.259645	24.0371
GOTERM_BP_FAT	GO:0055075~potassium ion homeostasis	3	1.63934	0.0148853	ATP1B1, ATP1B3, TFAP2B	175	18	16650	15.8571	1	0.259645	24.0371
GOTERM_BP_FAT	GO:0022604~regulation of cell morphogenesis	13	7.10383	0.0163293	PLXNC1, ENPP2, POSTN, SPARC, PALMD, TPM1, APOE, RGCC, MSN, COL1A1, CDC42EP3, SPP1, FN1	175	568	16650	2.17757	1	0.279756	26.0525
GOTERM_BP_FAT	GO:0008284~positive regulation of cell proliferation	17	9.28962	0.016395	KRT6A, MARCKSL1, TNC, EFNB2, SOX4, AQP1, MMP2, AKR1C3, DCT, NCK2, AKR1C2, EDNRB, HPSE, TFAP2B, HLA-DPA1, CD24, FN1	175	849	16650	1.9051	1	0.279382	26.1431
GOTERM_BP_FAT	GO:0030162~regulation of proteolysis	15	8.19672	0.0166752	A2M, S100A8, S100A9, SPOCK1, AQP1, SERPINE2, APOE, PI3, COL6A3, TFAP2B, SERPINB1, CTSC, CSTA, SERPINB13, FN1	175	708	16650	2.01574	1	0.282104	26.5278
GOTERM_BP_FAT	GO:0015850~organic hydroxy compound transport	7	3.82514	0.0167286	FCER1A, APOE, GPM6B, ABCA1, AQP1, AKR1C1, ABCG1	175	195	16650	3.41538	1	0.281546	26.6009
GOTERM_BP_FAT	GO:0043065~positive regulation of apoptotic process	13	7.10383	0.017157	AKR1C3, NCK2, S100A8, ALDH1A3, RGCC, S100A9, TFAP2B, SOX4, CTSC, MAL, TPD52L1, FRZB, PNMA1	175	572	16650	2.16234	1	0.28632	27.1849
GOTERM_BP_FAT	GO:0008015~blood circulation	12	6.55738	0.0174646	ATP2B1, EDNRB, ATP1B1, ATP1B3, APOE, ACTA2, ELN, COL1A2, GJA1, POSTN, SLC1A1, TPM1	175	506	16650	2.25635	1	0.289321	27.6015
GOTERM_BP_FAT	GO:0030155~regulation of cell adhesion	14	7.65027	0.0176179	TNC, EFNB2, POSTN, GPM6B, SPOCK1, TPM1, NCK2, SERPINE2, PRSS2, RGCC, HLA-DPA1, CD24, COL1A1, FN1	175	643	16650	2.07154	1	0.290133	27.8084
GOTERM_BP_FAT	GO:0040007~growth	18	9.83607	0.0180798	PLXNC1, ATP6V0E1, S100A8, TNC, S100A9, DUOX2, GJA1, POSTN, SPOCK1, FRZB, ALCAM, TYMS, SERPINE2, APOE, CLIC4, PRSS2, SPP1, FN1	175	932	16650	1.83752	1	0.295194	28.4281
GOTERM_BP_FAT	GO:0010874~regulation of cholesterol efflux	3	1.63934	0.0182347	APOE, ABCA1, ABCG1	175	20	16650	14.2714	1	0.295981	28.6348
GOTERM_BP_FAT	GO:0097435~fibril organization	3	1.63934	0.0182347	LTBP2, COL3A1, MUC5AC	175	20	16650	14.2714	1	0.295981	28.6348
GOTERM_BP_FAT	GO:0043068~positive regulation of programmed cell death	13	7.10383	0.0182357	AKR1C3, NCK2, S100A8, ALDH1A3, RGCC, S100A9, TFAP2B, SOX4, CTSC, MAL, TPD52L1, FRZB, PNMA1	175	577	16650	2.1436	1	0.294666	28.6362
GOTERM_BP_FAT	GO:0003013~circulatory system process	12	6.55738	0.0183981	ATP2B1, EDNRB, ATP1B1, ATP1B3, APOE, ACTA2, ELN, COL1A2, GJA1, POSTN, SLC1A1, TPM1	175	510	16650	2.23866	1	0.295549	28.8522
GOTERM_BP_FAT	GO:0046148~pigment biosynthetic process	4	2.18579	0.0188483	DCT, TYRP1, TYR, PMEL	175	54	16650	7.04762	1	0.300285	29.448
GOTERM_BP_FAT	GO:0001706~endoderm formation	4	2.18579	0.0188483	COL4A2, COL6A1, MMP2, FN1	175	54	16650	7.04762	1	0.300285	29.448
GOTERM_BP_FAT	GO:0035295~tube development	13	7.10383	0.0189071	COL4A1, TNC, EFNB2, COL3A1, GJA1, SOX4, SPARC, EDNRB, TYMS, SERPINE2, CLIC4, TFAP2B, CD24	175	580	16650	2.13251	1	0.299745	29.5255
GOTERM_BP_FAT	GO:0032101~regulation of response to external stimulus	15	8.19672	0.0191927	FCER1A, PLXNC1, A2M, S100A8, EFNB2, S100A9, GJA1, TSPAN8, CCL18, EDNRB, SERPINE2, APOE, HPSE, FABP4, SPP1	175	721	16650	1.97939	1	0.302213	29.9006
GOTERM_BP_FAT	GO:0001655~urogenital system development	9	4.91803	0.0194047	COL4A1, ACTA2, TNC, PECAM1, EFNB2, TFAP2B, SOX4, SRD5A1, CD24	175	320	16650	2.67589	1	0.303684	30.1779
GOTERM_BP_FAT	GO:0009636~response to toxic substance	7	3.82514	0.0195637	TYMS, APOE, DUOX2, TXN, S100A9, SLC6A14, SRD5A1	175	202	16650	3.29703	1	0.304446	30.3852
GOTERM_BP_FAT	GO:0032989~cellular component morphogenesis	23	12.5683	0.0198708	PLXNC1, ENPP2, DICER1, EFNB2, SPAG1, GJA1, ACTN1, POSTN, PALMD, TPM1, NEBL, ALCAM, CLIC4, APOE, PECAM1, RGCC, MYH11, COL1A1, MSN, CDC42EP3, SPP1, FN1, CDH11	175	1321	16650	1.65654	1	0.307115	30.7838
GOTERM_BP_FAT	GO:0042573~retinoic acid metabolic process	3	1.63934	0.0200174	AKR1C3, RBP1, ALDH1A3	175	21	16650	13.5918	1	0.30769	30.9734
GOTERM_BP_FAT	GO:2000026~regulation of multicellular organismal development	28	15.3005	0.020765	ASPN, PLXNC1, RBP1, ENPP2, COL3A1, DICER1, GJA1, GPM6B, SPOCK1, AQP1, CDH5, DCT, EDNRB, SERPINE2, HPSE, APOE, CD24, TCF4, THBS2, SPP1, FN1, COL4A2, EFNB2, MGP, SPARC, FRZB, RGCC, COL1A1	175	1721	16650	1.54794	1	0.315894	31.9323
GOTERM_BP_FAT	GO:0006583~melanin biosynthetic process from tyrosine	2	1.0929	0.0207923	DCT, TYR	175	2	16650	95.1429	1	0.314912	31.9671
GOTERM_BP_FAT	GO:0070488~neutrophil aggregation	2	1.0929	0.0207923	S100A8, S100A9	175	2	16650	95.1429	1	0.314912	31.9671
GOTERM_BP_FAT	GO:0034097~response to cytokine	16	8.74317	0.0210996	ASPN, KYNU, COL3A1, DUOX2, SYNCRIP, PLVAP, POSTN, SPARC, CCL18, TYMS, BGN, FABP4, HLA-DPA1, COL1A1, CD24, MX2	175	802	16650	1.89811	1	0.317442	32.3574
GOTERM_BP_FAT	GO:0014074~response to purine-containing compound	6	3.27869	0.0217443	TYR, DUOX2, SRD5A1, COL1A1, SPARC, AQP1	175	152	16650	3.75564	1	0.324105	33.1694
GOTERM_BP_FAT	GO:0071384~cellular response to corticosteroid stimulus	4	2.18579	0.0227513	AKR1C3, ATP2B1, SRD5A1, AQP1	175	58	16650	6.56158	1	0.335027	34.4193
GOTERM_BP_FAT	GO:0002064~epithelial cell development	7	3.82514	0.0236207	TYMS, ACTA2, CLIC4, PECAM1, GJA1, MSN, CDH5	175	211	16650	3.1564	1	0.344049	35.4807
GOTERM_BP_FAT	GO:0001885~endothelial cell development	4	2.18579	0.0237905	CLIC4, PECAM1, MSN, CDH5	175	59	16650	6.45036	1	0.344675	35.6861
GOTERM_BP_FAT	GO:0061045~negative regulation of wound healing	4	2.18579	0.0248551	SERPINE2, APOE, GJA1, TSPAN8	175	60	16650	6.34286	1	0.355698	36.9597
GOTERM_BP_FAT	GO:0016266~O-glycan processing	4	2.18579	0.0248551	GALNT1, ST6GAL1, MUC5AC, MUC4	175	60	16650	6.34286	1	0.355698	36.9597
GOTERM_BP_FAT	GO:0051346~negative regulation of hydrolase activity	10	5.46448	0.0252713	A2M, SERPINE2, COL6A3, PI3, TFAP2B, SERPINB1, SPOCK1, SERPINB13, CSTA, AQP1	175	401	16650	2.37264	1	0.359075	37.4512
GOTERM_BP_FAT	GO:0071379~cellular response to prostaglandin stimulus	3	1.63934	0.0257777	AKR1C3, AKR1C2, TNC	175	24	16650	11.8929	1	0.363422	38.0442
GOTERM_BP_FAT	GO:0009072~aromatic amino acid family metabolic process	3	1.63934	0.0257777	DCT, KYNU, TYR	175	24	16650	11.8929	1	0.363422	38.0442
GOTERM_BP_FAT	GO:0031669~cellular response to nutrient levels	6	3.27869	0.0257887	AKR1C3, ATP2B1, TNC, POSTN, SRD5A1, COL1A1	175	159	16650	3.5903	1	0.362142	38.057
GOTERM_BP_FAT	GO:0007179~transforming growth factor beta receptor signaling pathway	6	3.27869	0.0257887	ASPN, LTBP1, LTBP2, COL3A1, COL1A2, CDH5	175	159	16650	3.5903	1	0.362142	38.057
GOTERM_BP_FAT	GO:0008202~steroid metabolic process	8	4.37158	0.0261472	AKR1C3, CYP3A5, AKR1C2, APOE, SRD5A1, ABCA1, AKR1C1, ABCG1	175	276	16650	2.75776	1	0.364766	38.4736
GOTERM_BP_FAT	GO:0022603~regulation of anatomical structure morphogenesis	19	10.3825	0.026659	ASPN, COL4A2, PLXNC1, ENPP2, EFNB2, POSTN, PALMD, SPARC, AQP1, TPM1, APOE, RGCC, COL1A1, MSN, TCF4, THBS2, CDC42EP3, SPP1, FN1	175	1051	16650	1.71999	1	0.36905	39.0636
GOTERM_BP_FAT	GO:0007417~central nervous system development	17	9.28962	0.0275235	COL4A1, S100A8, COL3A1, DUOX2, S100A9, SOX4, SPOCK1, MAL, AQP1, DCT, ATP2B1, SERPINE2, ALDH1A3, SRD5A1, PITX1, FAIM2, CDH11	175	904	16650	1.78919	1	0.377111	40.0482
GOTERM_BP_FAT	GO:0085029~extracellular matrix assembly	3	1.63934	0.0278298	RGCC, MYH11, GPM6B	175	25	16650	11.4171	1	0.379009	40.3934
GOTERM_BP_FAT	GO:0032438~melanosome organization	3	1.63934	0.0278298	TYRP1, PMEL, RAB38	175	25	16650	11.4171	1	0.379009	40.3934
GOTERM_BP_FAT	GO:0002227~innate immune response in mucosa	3	1.63934	0.0278298	HIST1H2BD, HIST1H2BK, HIST2H2BE	175	25	16650	11.4171	1	0.379009	40.3934
GOTERM_BP_FAT	GO:0030004~cellular monovalent inorganic cation homeostasis	5	2.73224	0.0282947	ATP1B1, ATP6V0E1, ATP1B3, CLIC4, RAB38	175	110	16650	4.32468	1	0.382579	40.9137
GOTERM_BP_FAT	GO:0003158~endothelium development	5	2.73224	0.029121	CLIC4, PECAM1, GJA1, MSN, CDH5	175	111	16650	4.28571	1	0.389907	41.828
GOTERM_BP_FAT	GO:0045765~regulation of angiogenesis	7	3.82514	0.0292761	COL4A2, ENPP2, RGCC, SPARC, TCF4, AQP1, THBS2	175	222	16650	3	1	0.390107	41.9981
GOTERM_BP_FAT	GO:0048753~pigment granule organization	3	1.63934	0.0299453	TYRP1, PMEL, RAB38	175	26	16650	10.978	1	0.395633	42.7268
GOTERM_BP_FAT	GO:0050790~regulation of catalytic activity	35	19.1257	0.0301014	ASPN, ATP1B1, A2M, S100A8, ATP1B3, GM2A, ABHD5, S100A9, SPOCK1, AQP1, TPM1, GPRC5A, EDNRB, SET, SERPINE2, APOE, COL6A3, SERPINB13, CD24, CDC42EP3, FN1, FCER1A, TPD52L1, CCL18, NCK2, BGN, RGS5, PI3, RGCC, TXN, TFAP2B, SERPINB1, FABP4, CSTA, CTSB	175	2357	16650	1.41281	1	0.395814	42.8955
GOTERM_BP_FAT	GO:1903288~positive regulation of potassium ion import	2	1.0929	0.0310267	ATP1B1, ATP1B3	175	3	16650	63.4286	1	0.403808	43.886
GOTERM_BP_FAT	GO:0030070~insulin processing	2	1.0929	0.0310267	PCSK2, CPE	175	3	16650	63.4286	1	0.403808	43.886
GOTERM_BP_FAT	GO:0051050~positive regulation of transport	17	9.28962	0.0316355	FCER1A, ATP1B1, S100A8, ATP1B3, UGCG, S100A9, SOX4, GJA1, POSTN, ABCA1, AQP1, ABCG1, EDNRB, APOE, RGCC, MSN, NMU	175	920	16650	1.75807	1	0.408482	44.5288
GOTERM_BP_FAT	GO:0031099~regeneration	6	3.27869	0.0316637	TYMS, APOE, TNC, GJA1, POSTN, SPP1	175	168	16650	3.39796	1	0.40733	44.5584
GOTERM_BP_FAT	GO:0008299~isoprenoid biosynthetic process	3	1.63934	0.0321226	AKR1C3, RBP1, ALDH1A3	175	27	16650	10.5714	1	0.410446	45.0381
GOTERM_BP_FAT	GO:0042476~odontogenesis	5	2.73224	0.0325689	ASPN, TNC, COL1A2, COL1A1, AQP1	175	115	16650	4.13665	1	0.413396	45.5009
GOTERM_BP_FAT	GO:0032535~regulation of cellular component size	9	4.91803	0.032792	NCK2, PLXNC1, APOE, ELN, MSN, AQP1, CDC42EP3, SPP1, FN1	175	354	16650	2.41889	1	0.414143	45.7308
GOTERM_BP_FAT	GO:0048732~gland development	10	5.46448	0.033051	TYMS, TYR, SERPINE2, TNC, DUOX2, HK2, SRD5A1, MSN, FRZB, PITX1	175	421	16650	2.25993	1	0.415229	45.9965
GOTERM_BP_FAT	GO:0032787~monocarboxylic acid metabolic process	12	6.55738	0.0330558	AKR1C3, FCER1A, AKR1C2, TYRP1, KYNU, RBP1, SCD, ALDH1A3, ABHD5, HK2, QKI, AKR1C1	175	559	16650	2.04242	1	0.413861	46.0015
GOTERM_BP_FAT	GO:1901654~response to ketone	6	3.27869	0.033064	ATP2B1, TYMS, POSTN, SRD5A1, MSN, AQP1	175	170	16650	3.35798	1	0.412533	46.0098
GOTERM_BP_FAT	GO:0006955~immune response	25	13.6612	0.0331287	FCER1A, ST6GAL1, A2M, KYNU, HIST1H2BD, S100A8, ENPP2, S100A9, COL3A1, SYNCRIP, MMP2, CCL18, ITM2A, ALCAM, HIST1H2BK, KRT16, HIST2H2BE, RGCC, CTSC, HLA-DPA1, CLEC7A, CTSB, CD24, MX2, PNMA1	175	1551	16650	1.53357	1	0.411758	46.0761
GOTERM_BP_FAT	GO:0060284~regulation of cell development	16	8.74317	0.0333467	PLXNC1, DICER1, COL3A1, POSTN, SPOCK1, FRZB, CDH5, DCT, EDNRB, SERPINE2, APOE, RGCC, COL1A1, TCF4, SPP1, FN1	175	851	16650	1.78882	1	0.412449	46.2985
GOTERM_BP_FAT	GO:0051493~regulation of cytoskeleton organization	10	5.46448	0.0334791	NCK2, S100A8, CLIC4, RGCC, ELN, S100A9, GPM6B, CAPN2, CDC42EP3, TPM1	175	422	16650	2.25457	1	0.412323	46.4332
GOTERM_BP_FAT	GO:0008217~regulation of blood pressure	6	3.27869	0.0339009	EDNRB, ACTA2, COL1A2, GJA1, POSTN, TPM1	175	171	16650	3.33835	1	0.414928	46.8601
GOTERM_BP_FAT	GO:0033363~secretory granule organization	3	1.63934	0.0343603	SERPINE2, RAB38, ABCA1	175	28	16650	10.1939	1	0.417852	47.3215
GOTERM_BP_FAT	GO:0050729~positive regulation of inflammatory response	5	2.73224	0.0343788	FCER1A, S100A8, S100A9, FABP4, CCL18	175	117	16650	4.06593	1	0.416647	47.3399
GOTERM_BP_FAT	GO:0000902~cell morphogenesis	21	11.4754	0.0347378	PLXNC1, ENPP2, DICER1, EFNB2, SPAG1, ACTN1, GJA1, POSTN, PALMD, TPM1, ALCAM, APOE, CLIC4, PECAM1, RGCC, COL1A1, MSN, CDC42EP3, SPP1, FN1, CDH11	175	1240	16650	1.61129	1	0.418604	47.6977
GOTERM_BP_FAT	GO:0042981~regulation of apoptotic process	23	12.5683	0.0351794	S100A8, S100A9, SOX4, ACTN1, MAL, TPD52L1, FRZB, AQP1, AKR1C3, NCK2, EDNRB, SET, APOE, ALDH1A3, RGCC, PIP, TFAP2B, CTSC, CEACAM5, SERPINB13, CTSB, FAIM2, PNMA1	175	1400	16650	1.56306	1	0.421295	48.1345
GOTERM_BP_FAT	GO:0008361~regulation of cell size	6	3.27869	0.0352468	PLXNC1, APOE, MSN, AQP1, SPP1, FN1	175	173	16650	3.29975	1	0.420546	48.201
GOTERM_BP_FAT	GO:0050680~negative regulation of epithelial cell proliferation	5	2.73224	0.0353053	APOE, RGCC, EFNB2, GJA1, SPARC	175	118	16650	4.03148	1	0.41972	48.2585
GOTERM_BP_FAT	GO:0042692~muscle cell differentiation	9	4.91803	0.0366694	EDNRB, EFNB2, MYH11, QKI, CEACAM5, CAPN2, TPM1, PITX1, NEBL	175	362	16650	2.36543	1	0.430646	49.5834
GOTERM_BP_FAT	GO:0051668~localization within membrane	4	2.18579	0.0368884	ATP1B1, APOE, MAL, CD24	175	70	16650	5.43673	1	0.431224	49.7931
GOTERM_BP_FAT	GO:0042440~pigment metabolic process	4	2.18579	0.0368884	DCT, TYRP1, TYR, PMEL	175	70	16650	5.43673	1	0.431224	49.7931
GOTERM_BP_FAT	GO:0071300~cellular response to retinoic acid	4	2.18579	0.0368884	TNC, COL1A1, ABCA1, AQP1	175	70	16650	5.43673	1	0.431224	49.7931
GOTERM_BP_FAT	GO:0051241~negative regulation of multicellular organismal process	18	9.83607	0.037523	ASPN, COL4A2, COL3A1, DICER1, GJA1, SPOCK1, TSPAN8, SPARC, FRZB, EDNRB, SERPINE2, APOE, RGCC, CD24, TCF4, THBS2, SPP1, FN1	175	1017	16650	1.68394	1	0.435453	50.3961
GOTERM_BP_FAT	GO:0055080~cation homeostasis	13	7.10383	0.0376869	ATP2B1, EDNRB, ATP1B1, ATP6V0E1, S100A8, ATP1B3, APOE, CLIC4, S100A9, TFAP2B, GJA1, RAB38, CD24	175	643	16650	1.92357	1	0.435523	50.5507
GOTERM_BP_FAT	GO:0071260~cellular response to mechanical stimulus	4	2.18579	0.0382291	MMP7, GJA1, COL1A1, AQP1	175	71	16650	5.36016	1	0.438872	51.059
GOTERM_BP_FAT	GO:0022411~cellular component disassembly	11	6.01093	0.0383355	A2M, SET, PRSS2, DICER1, ELN, HK2, MMP7, CAPN2, MMP2, SPP1, FN1	175	502	16650	2.0848	1	0.438431	51.1581
GOTERM_BP_FAT	GO:0043067~regulation of programmed cell death	23	12.5683	0.0383773	S100A8, S100A9, SOX4, ACTN1, MAL, TPD52L1, FRZB, AQP1, AKR1C3, NCK2, EDNRB, SET, APOE, ALDH1A3, RGCC, PIP, TFAP2B, CTSC, CEACAM5, SERPINB13, CTSB, FAIM2, PNMA1	175	1413	16650	1.54868	1	0.43744	51.1971
GOTERM_BP_FAT	GO:0030003~cellular cation homeostasis	12	6.55738	0.0384526	ATP2B1, EDNRB, ATP1B1, ATP6V0E1, S100A8, ATP1B3, APOE, CLIC4, S100A9, GJA1, RAB38, CD24	175	573	16650	1.99252	1	0.436741	51.2671
GOTERM_BP_FAT	GO:2001235~positive regulation of apoptotic signaling pathway	6	3.27869	0.0384578	NCK2, S100A8, S100A9, CTSC, MAL, TPD52L1	175	177	16650	3.22518	1	0.435448	51.2719
GOTERM_BP_FAT	GO:0042572~retinol metabolic process	3	1.63934	0.0390109	AKR1C3, RBP1, ALDH1A3	175	30	16650	9.51429	1	0.438825	51.7831
GOTERM_BP_FAT	GO:0044057~regulation of system process	11	6.01093	0.039213	ATP2B1, EDNRB, ATP1B1, ATP1B3, DICER1, LMCD1, GJA1, AQP1, SLC1A1, TPM1, NMU	175	504	16650	2.07653	1	0.439204	51.9688
GOTERM_BP_FAT	GO:0051336~regulation of hydrolase activity	22	12.0219	0.0393714	ATP1B1, A2M, S100A8, ATP1B3, GM2A, ABHD5, S100A9, SPOCK1, AQP1, TPM1, CCL18, NCK2, SERPINE2, RGS5, COL6A3, PI3, TFAP2B, SERPINB1, SERPINB13, CSTA, CDC42EP3, FN1	175	1337	16650	1.56555	1	0.439211	52.1137
GOTERM_BP_FAT	GO:0009607~response to biotic stimulus	16	8.74317	0.0402843	HIST1H2BD, S100A8, ACTA2, DUOX2, S100A9, LYZ, SPARC, ABCA1, CCL18, EDNRB, HIST1H2BK, HIST2H2BE, CD24, CLEC7A, MX2, LOXL1	175	873	16650	1.74374	1	0.445504	52.9411
GOTERM_BP_FAT	GO:0030301~cholesterol transport	4	2.18579	0.0409843	APOE, ABCA1, AKR1C1, ABCG1	175	73	16650	5.21331	1	0.449941	53.5663
GOTERM_BP_FAT	GO:1903286~regulation of potassium ion import	2	1.0929	0.0411547	ATP1B1, ATP1B3	175	4	16650	47.5714	1	0.450006	53.7174
GOTERM_BP_FAT	GO:1903273~regulation of sodium ion export	2	1.0929	0.0411547	ATP1B1, ATP1B3	175	4	16650	47.5714	1	0.450006	53.7174
GOTERM_BP_FAT	GO:1903275~positive regulation of sodium ion export	2	1.0929	0.0411547	ATP1B1, ATP1B3	175	4	16650	47.5714	1	0.450006	53.7174
GOTERM_BP_FAT	GO:1903276~regulation of sodium ion export from cell	2	1.0929	0.0411547	ATP1B1, ATP1B3	175	4	16650	47.5714	1	0.450006	53.7174
GOTERM_BP_FAT	GO:1903278~positive regulation of sodium ion export from cell	2	1.0929	0.0411547	ATP1B1, ATP1B3	175	4	16650	47.5714	1	0.450006	53.7174
GOTERM_BP_FAT	GO:0042982~amyloid precursor protein metabolic process	3	1.63934	0.0414208	APOE, ABCG1, ITM2A	175	31	16650	9.20737	1	0.450847	53.9522
GOTERM_BP_FAT	GO:0010107~potassium ion import	3	1.63934	0.0414208	KCNJ15, ATP1B1, ATP1B3	175	31	16650	9.20737	1	0.450847	53.9522
GOTERM_BP_FAT	GO:0010721~negative regulation of cell development	8	4.37158	0.0420519	EDNRB, APOE, COL3A1, DICER1, POSTN, SPOCK1, FRZB, SPP1	175	306	16650	2.48739	1	0.454621	54.5048
GOTERM_BP_FAT	GO:0044242~cellular lipid catabolic process	6	3.27869	0.0423913	AKR1C3, GM2A, APOE, ENPP2, ABHD5, FABP4	175	182	16650	3.13658	1	0.456019	54.7994
GOTERM_BP_FAT	GO:0007507~heart development	11	6.01093	0.0423939	APLNR, LTBP1, CPE, COL3A1, EFNB2, MYH11, SOX4, GJA1, SPARC, TPM1, NEBL	175	511	16650	2.04808	1	0.454724	54.8017
GOTERM_BP_FAT	GO:0010941~regulation of cell death	24	13.1148	0.0424171	S100A8, S100A9, SOX4, ACTN1, MAL, TPD52L1, FRZB, AQP1, AKR1C3, NCK2, EDNRB, SET, APOE, ALDH1A3, TXN, RGCC, PIP, TFAP2B, CTSC, CEACAM5, SERPINB13, CTSB, FAIM2, PNMA1	175	1509	16650	1.51321	1	0.4536	54.8217
GOTERM_BP_FAT	GO:0034248~regulation of cellular amide metabolic process	9	4.91803	0.0430483	NCK2, TYMS, DIO2, APOE, DICER1, S100A9, SOX4, QKI, SYNCRIP	175	374	16650	2.28953	1	0.457291	55.3645
GOTERM_BP_FAT	GO:0010038~response to metal ion	8	4.37158	0.0432076	AKR1C3, S100A8, CLIC4, TFAP2B, FABP4, TFF1, SPARC, AQP1	175	308	16650	2.47124	1	0.457241	55.5006
GOTERM_BP_FAT	GO:0098771~inorganic ion homeostasis	13	7.10383	0.0436291	ATP2B1, EDNRB, ATP1B1, ATP6V0E1, S100A8, ATP1B3, APOE, CLIC4, S100A9, TFAP2B, GJA1, RAB38, CD24	175	658	16650	1.87972	1	0.459237	55.8585
GOTERM_BP_FAT	GO:0015918~sterol transport	4	2.18579	0.0438371	APOE, ABCA1, AKR1C1, ABCG1	175	75	16650	5.07429	1	0.459558	56.0342
GOTERM_BP_FAT	GO:1901661~quinone metabolic process	3	1.63934	0.0438853	AKR1C3, AKR1C2, AKR1C1	175	32	16650	8.91964	1	0.458641	56.0748
GOTERM_BP_FAT	GO:0031324~negative regulation of cellular metabolic process	34	18.5792	0.0439791	ASPN, HIST1H2AC, HIST2H2AA3, A2M, DICER1, HK2, GJA1, SOX4, SYNCRIP, SPOCK1, AQP1, GPRC5A, ITM2A, AKR1C3, EDNRB, SET, SERPINE2, APOE, COL6A3, QKI, SERPINB13, TCF4, PITX1, HIST1H1C, LMCD1, NCK2, GRB10, BGN, PI3, TXN, TFAP2B, SERPINB1, FABP4, CSTA	175	2345	16650	1.37947	1	0.458081	56.1537
GOTERM_BP_FAT	GO:0006952~defense response	24	13.1148	0.0448655	FCER1A, A2M, KYNU, HIST1H2BD, S100A8, S100A9, LYZ, GJA1, SYNCRIP, MMP2, CCL18, EDNRB, HIST1H2BK, HIST2H2BE, KRT16, APOE, FABP4, HLA-DPA1, CLEC7A, CTSB, MX2, SPP1, FN1, PNMA1	175	1518	16650	1.50423	1	0.463598	56.8931
GOTERM_BP_FAT	GO:0006873~cellular ion homeostasis	12	6.55738	0.0448906	ATP2B1, EDNRB, ATP1B1, ATP6V0E1, S100A8, ATP1B3, APOE, CLIC4, S100A9, GJA1, RAB38, CD24	175	588	16650	1.94169	1	0.462506	56.9138
GOTERM_BP_FAT	GO:0003008~system process	30	16.3934	0.0452701	ATP1B1, ATP1B3, GM2A, CALD1, ELN, DICER1, GJA1, POSTN, AQP1, TPM1, AKR1C3, ATP2B1, EDNRB, TYR, SERPINE2, APOE, ALDH1A3, PIP, TFF1, SLC1A1, NMU, AKR1C1, ACTA2, LMCD1, MCAM, MUC4, COL1A2, MYH11, TFAP2B, COL1A1	175	2014	16650	1.41722	1	0.464107	57.2265
GOTERM_BP_FAT	GO:0072330~monocarboxylic acid biosynthetic process	6	3.27869	0.0458501	AKR1C3, FCER1A, RBP1, SCD, ALDH1A3, QKI	175	186	16650	3.06912	1	0.467196	57.7004
GOTERM_BP_FAT	GO:0012501~programmed cell death	28	15.3005	0.0463954	S100A8, DICER1, S100A9, HK2, SOX4, GJA1, AQP1, AKR1C3, EDNRB, SET, APOE, ALDH1A3, PIP, CEACAM5, SERPINB13, CD24, ACTN1, TPD52L1, MAL, FRZB, NCK2, CLIC4, RGCC, TFAP2B, CTSC, CTSB, FAIM2, PNMA1	175	1852	16650	1.43844	1	0.469988	58.1414
GOTERM_BP_FAT	GO:0019433~triglyceride catabolic process	3	1.63934	0.0464029	APOE, ABHD5, FABP4	175	33	16650	8.64935	1	0.468772	58.1474
GOTERM_BP_FAT	GO:0007492~endoderm development	4	2.18579	0.0467866	COL4A2, COL6A1, MMP2, FN1	175	77	16650	4.94249	1	0.470342	58.455
GOTERM_BP_FAT	GO:0050727~regulation of inflammatory response	8	4.37158	0.0470757	FCER1A, EDNRB, A2M, S100A8, APOE, S100A9, FABP4, CCL18	175	314	16650	2.42402	1	0.471203	58.6854
GOTERM_BP_FAT	GO:0070482~response to oxygen levels	8	4.37158	0.0470757	ATP1B1, RGCC, POSTN, COL1A1, CD24, CAPN2, AQP1, MMP2	175	314	16650	2.42402	1	0.471203	58.6854
GOTERM_BP_FAT	GO:0048545~response to steroid hormone	9	4.91803	0.0470898	AKR1C3, ATP2B1, TYMS, MED24, SRD5A1, COL1A1, SPARC, AQP1, SPP1	175	381	16650	2.24747	1	0.470048	58.6966
GOTERM_BP_FAT	GO:0002009~morphogenesis of an epithelium	11	6.01093	0.0472385	KRT6A, COL4A1, CLIC4, KRT16, TNC, ALDH1A3, EFNB2, SOX4, GJA1, MSN, FRZB	175	521	16650	2.00877	1	0.469882	58.8146
GOTERM_BP_FAT	GO:0031668~cellular response to extracellular stimulus	6	3.27869	0.0475511	AKR1C3, ATP2B1, TNC, POSTN, SRD5A1, COL1A1	175	188	16650	3.03647	1	0.470908	59.0616
GOTERM_BP_FAT	GO:0006508~proteolysis	26	14.2077	0.0480675	CPA4, CLCA2, A2M, S100A8, S100A9, MMP7, SPOCK1, AQP1, CAPN2, MMP2, PCSK2, SERPINE2, CPE, APOE, PRSS2, PI3, COL6A3, PIP, TFAP2B, SERPINB1, CTSC, SERPINB13, CTSB, CSTA, PRSS23, FN1	175	1693	16650	1.46114	1	0.473395	59.4666
GOTERM_BP_FAT	GO:0002385~mucosal immune response	3	1.63934	0.0489724	HIST1H2BD, HIST1H2BK, HIST2H2BE	175	34	16650	8.39496	1	0.478623	60.1672
GOTERM_BP_FAT	GO:0071827~plasma lipoprotein particle organization	3	1.63934	0.0489724	APOE, ABCA1, ABCG1	175	34	16650	8.39496	1	0.478623	60.1672
GOTERM_BP_FAT	GO:0034694~response to prostaglandin	3	1.63934	0.0489724	AKR1C3, AKR1C2, TNC	175	34	16650	8.39496	1	0.478623	60.1672
GOTERM_BP_FAT	GO:0070167~regulation of biomineral tissue development	4	2.18579	0.0498317	ASPN, MGP, GJA1, GPM6B	175	79	16650	4.81736	1	0.483447	60.8218
GOTERM_BP_FAT	GO:0032489~regulation of Cdc42 protein signal transduction	2	1.0929	0.0511775	APOE, ABCA1	175	5	16650	38.0571	1	0.491565	61.8267
GOTERM_BP_FAT	GO:0032119~sequestering of zinc ion	2	1.0929	0.0511775	S100A8, S100A9	175	5	16650	38.0571	1	0.491565	61.8267
GOTERM_BP_FAT	GO:0008219~cell death	29	15.847	0.0524823	S100A8, DICER1, S100A9, HK2, SOX4, GJA1, AQP1, AKR1C3, EDNRB, SET, APOE, ALDH1A3, PIP, CEACAM5, SERPINB13, CD24, ACTN1, MAL, TPD52L1, FRZB, NCK2, CLIC4, RGCC, TXN, TFAP2B, CTSC, CTSB, FAIM2, PNMA1	175	1958	16650	1.40916	1	0.499232	62.7776
GOTERM_BP_FAT	GO:0043207~response to external biotic stimulus	15	8.19672	0.0524961	HIST1H2BD, S100A8, ACTA2, DUOX2, S100A9, LYZ, SPARC, ABCA1, EDNRB, HIST1H2BK, HIST2H2BE, CD24, CLEC7A, MX2, LOXL1	175	829	16650	1.72152	1	0.498069	62.7876
GOTERM_BP_FAT	GO:0051707~response to other organism	15	8.19672	0.0524961	HIST1H2BD, S100A8, ACTA2, DUOX2, S100A9, LYZ, SPARC, ABCA1, EDNRB, HIST1H2BK, HIST2H2BE, CD24, CLEC7A, MX2, LOXL1	175	829	16650	1.72152	1	0.498069	62.7876
GOTERM_BP_FAT	GO:0045595~regulation of cell differentiation	24	13.1148	0.0525236	PLXNC1, RBP1, COL3A1, DICER1, EFNB2, GJA1, SPOCK1, POSTN, ABCA1, FRZB, CDH5, ABCG1, DCT, EDNRB, SERPINE2, APOE, RGCC, TFAP2B, CEACAM5, COL1A1, CD24, TCF4, SPP1, FN1	175	1544	16650	1.4789	1	0.497004	62.8073
GOTERM_BP_FAT	GO:0006082~organic acid metabolic process	16	8.74317	0.0529645	FCER1A, TYRP1, ST6GAL1, KYNU, RBP1, SCD, ABHD5, SLC6A14, HK2, AKR1C3, DCT, AKR1C2, TYR, ALDH1A3, QKI, AKR1C1	175	907	16650	1.67837	1	0.498729	63.1233
GOTERM_BP_FAT	GO:0065003~macromolecular complex assembly	26	14.2077	0.0529692	ELN, DICER1, MED24, GJA1, ABCA1, SET, HIST1H2BK, APOE, COL6A1, MSN, TCF4, SLC1A1, CDC42EP3, AKR1C1, FN1, HIST1H2BD, HIST1H1C, SPAG1, VWF, NCK2, HIST2H2BE, COL1A2, MYH11, CTSC, COL1A1, SNRPE	175	1710	16650	1.44662	1	0.497518	63.1267
GOTERM_BP_FAT	GO:0021782~glial cell development	4	2.18579	0.0529712	S100A8, DICER1, S100A9, SOX4	175	81	16650	4.69841	1	0.496295	63.1281
GOTERM_BP_FAT	GO:0007010~cytoskeleton organization	19	10.3825	0.0536701	KRT6A, KRT6B, TUBB2A, S100A9, ELN, KIAA0101, SPAG1, ACTN1, GPM6B, AQP1, TPM1, NEBL, NCK2, KRT16, APOE, RGCC, MYH11, MSN, CDC42EP3	175	1144	16650	1.58017	1	0.499723	63.6238
GOTERM_BP_FAT	GO:0051049~regulation of transport	27	14.7541	0.0538851	KCNJ15, ATP1B1, S100A8, ATP1B3, S100A9, HK2, SOX4, GJA1, POSTN, GPM6B, ABCA1, AQP1, EDNRB, SERPINE2, APOE, MSN, MX2, NMU, FN1, FCER1A, UGCG, ABCG1, GRB10, CLIC4, RGCC, TXN, TFAP2B	175	1796	16650	1.43032	1	0.499916	63.775
GOTERM_BP_FAT	GO:0001649~osteoblast differentiation	6	3.27869	0.0540794	TNC, GJA1, COL6A1, SYNCRIP, COL1A1, SPP1	175	195	16650	2.92747	1	0.499972	63.9111
GOTERM_BP_FAT	GO:0050931~pigment cell differentiation	3	1.63934	0.0542614	EDNRB, TYRP1, RAB38	175	36	16650	7.92857	1	0.499947	64.0382
GOTERM_BP_FAT	GO:0071825~protein-lipid complex subunit organization	3	1.63934	0.0542614	APOE, ABCA1, ABCG1	175	36	16650	7.92857	1	0.499947	64.0382
GOTERM_BP_FAT	GO:0002251~organ or tissue specific immune response	3	1.63934	0.0542614	HIST1H2BD, HIST1H2BK, HIST2H2BE	175	36	16650	7.92857	1	0.499947	64.0382
GOTERM_BP_FAT	GO:0090662~ATP hydrolysis coupled transmembrane transport	3	1.63934	0.0542614	ATP1B1, ATP6V0E1, ATP1B3	175	36	16650	7.92857	1	0.499947	64.0382
GOTERM_BP_FAT	GO:0051271~negative regulation of cellular component movement	7	3.82514	0.0548518	APOE, CLIC4, KRT16, RGCC, COL3A1, ACTN1, TPM1	175	259	16650	2.57143	1	0.50259	64.4475
GOTERM_BP_FAT	GO:0045087~innate immune response	15	8.19672	0.0555388	A2M, KYNU, HIST1H2BD, S100A8, S100A9, SYNCRIP, MMP2, CCL18, HIST1H2BK, HIST2H2BE, KRT16, HLA-DPA1, CTSB, CLEC7A, MX2	175	836	16650	1.70711	1	0.505826	64.9183
GOTERM_BP_FAT	GO:0015748~organophosphate ester transport	4	2.18579	0.0562039	APOE, GJA1, ABCA1, ABCG1	175	83	16650	4.5852	1	0.508882	65.3684
GOTERM_BP_FAT	GO:0001894~tissue homeostasis	6	3.27869	0.0568307	PIP, LYZ, TFF1, MUC5AC, SPP1, MUC4	175	198	16650	2.88312	1	0.511659	65.7876
GOTERM_BP_FAT	GO:0002526~acute inflammatory response	5	2.73224	0.056861	FCER1A, EDNRB, A2M, S100A8, FN1	175	138	16650	3.4472	1	0.510638	65.8078
GOTERM_BP_FAT	GO:0046394~carboxylic acid biosynthetic process	7	3.82514	0.0569354	AKR1C3, FCER1A, KYNU, RBP1, SCD, ALDH1A3, QKI	175	262	16650	2.54198	1	0.509901	65.8571
GOTERM_BP_FAT	GO:0086009~membrane repolarization	3	1.63934	0.0569783	ATP1B1, ATP1B3, GJA1	175	37	16650	7.71429	1	0.50897	65.8856
GOTERM_BP_FAT	GO:0007618~mating	3	1.63934	0.0569783	EDNRB, SERPINE2, PI3	175	37	16650	7.71429	1	0.50897	65.8856
GOTERM_BP_FAT	GO:0006939~smooth muscle contraction	4	2.18579	0.0578548	EDNRB, ACTA2, MYH11, NMU	175	84	16650	4.53061	1	0.513271	66.4622
GOTERM_BP_FAT	GO:0051897~positive regulation of protein kinase B signaling	4	2.18579	0.0578548	AKR1C3, AKR1C2, HPSE, TXN	175	84	16650	4.53061	1	0.513271	66.4622
GOTERM_BP_FAT	GO:0010035~response to inorganic substance	10	5.46448	0.0581435	AKR1C3, S100A8, CLIC4, TXN, TFAP2B, FABP4, COL1A1, TFF1, SPARC, AQP1	175	469	16650	2.02863	1	0.513871	66.6501
GOTERM_BP_FAT	GO:0032870~cellular response to hormone stimulus	12	6.55738	0.0588209	AKR1C3, ATP2B1, AKR1C2, ATP6V0E1, GRB10, RAB31, TNC, MED24, SRD5A1, CTSB, AQP1, AKR1C1	175	616	16650	1.85343	1	0.516867	67.0871
GOTERM_BP_FAT	GO:0006936~muscle contraction	8	4.37158	0.059285	EDNRB, ATP1B1, ACTA2, CALD1, MYH11, GJA1, TPM1, NMU	175	331	16650	2.29953	1	0.518522	67.3834
GOTERM_BP_FAT	GO:0098869~cellular oxidant detoxification	4	2.18579	0.0595285	APOE, DUOX2, TXN, S100A9	175	85	16650	4.47731	1	0.518818	67.5378
GOTERM_BP_FAT	GO:0032371~regulation of sterol transport	3	1.63934	0.0597417	APOE, ABCA1, ABCG1	175	38	16650	7.51128	1	0.51893	67.6724
GOTERM_BP_FAT	GO:0090382~phagosome maturation	3	1.63934	0.0597417	ATP6V0E1, RAB31, RAB38	175	38	16650	7.51128	1	0.51893	67.6724
GOTERM_BP_FAT	GO:0032374~regulation of cholesterol transport	3	1.63934	0.0597417	APOE, ABCA1, ABCG1	175	38	16650	7.51128	1	0.51893	67.6724
GOTERM_BP_FAT	GO:0009617~response to bacterium	11	6.01093	0.0597678	EDNRB, HIST1H2BD, S100A8, HIST1H2BK, HIST2H2BE, S100A9, LYZ, CD24, ABCA1, SPARC, LOXL1	175	544	16650	1.92384	1	0.517905	67.6889
GOTERM_BP_FAT	GO:0007166~cell surface receptor signaling pathway	37	20.2186	0.0604919	ASPN, ATP6V0E1, PLXNC1, LTBP1, LTBP2, DUOX2, COL3A1, TSPAN7, SOX4, TSPAN8, PLVAP, ABCA1, MMP2, GPRC5A, CDH5, EDNRB, SERPINE2, APOE, UPK1B, CD24, MX2, FCER1A, COL4A2, COL4A1, EFNB2, MAL, FRZB, CCL18, NCK2, GRB10, BGN, CPE, COL1A2, TFAP2B, HLA-DPA1, COL1A1, CLEC7A	175	2669	16650	1.31895	1	0.521101	68.142
GOTERM_BP_FAT	GO:0031349~positive regulation of defense response	9	4.91803	0.0606761	FCER1A, S100A8, S100A9, GJA1, FABP4, CLEC7A, CTSB, MMP2, CCL18	175	402	16650	2.13006	1	0.52103	68.2563
GOTERM_BP_FAT	GO:0032596~protein transport into membrane raft	2	1.0929	0.0610961	ATP1B1, CD24	175	6	16650	31.7143	1	0.522367	68.5155
GOTERM_BP_FAT	GO:0071394~cellular response to testosterone stimulus	2	1.0929	0.0610961	SRD5A1, MSN	175	6	16650	31.7143	1	0.522367	68.5155
GOTERM_BP_FAT	GO:1901142~insulin metabolic process	2	1.0929	0.0610961	PCSK2, CPE	175	6	16650	31.7143	1	0.522367	68.5155
GOTERM_BP_FAT	GO:0001957~intramembranous ossification	2	1.0929	0.0610961	COL1A1, MMP2	175	6	16650	31.7143	1	0.522367	68.5155
GOTERM_BP_FAT	GO:0010887~negative regulation of cholesterol storage	2	1.0929	0.0610961	ABCA1, ABCG1	175	6	16650	31.7143	1	0.522367	68.5155
GOTERM_BP_FAT	GO:0036072~direct ossification	2	1.0929	0.0610961	COL1A1, MMP2	175	6	16650	31.7143	1	0.522367	68.5155
GOTERM_BP_FAT	GO:0038063~collagen-activated tyrosine kinase receptor signaling pathway	2	1.0929	0.0610961	COL4A2, COL4A1	175	6	16650	31.7143	1	0.522367	68.5155
GOTERM_BP_FAT	GO:0006887~exocytosis	9	4.91803	0.0620865	FCER1A, VWF, A2M, RAB31, PECAM1, ACTN1, PCDH7, SPARC, FN1	175	404	16650	2.11952	1	0.527064	69.1188
GOTERM_BP_FAT	GO:1901135~carbohydrate derivative metabolic process	20	10.929	0.0624188	ATP1B1, ST6GAL1, GALNT1, GM2A, UGCG, HK2, ABCA1, AQP1, DSE, MUC4, ITM2A, AKR1C3, AKR1C2, EDNRB, TYMS, BGN, HPSE, APOE, MUC5AC, AKR1C1	175	1247	16650	1.52595	1	0.527846	69.3188
GOTERM_BP_FAT	GO:0046464~acylglycerol catabolic process	3	1.63934	0.0625505	APOE, ABHD5, FABP4	175	39	16650	7.31868	1	0.52745	69.3976
GOTERM_BP_FAT	GO:0032781~positive regulation of ATPase activity	3	1.63934	0.0625505	ATP1B1, ATP1B3, TPM1	175	39	16650	7.31868	1	0.52745	69.3976
GOTERM_BP_FAT	GO:0033344~cholesterol efflux	3	1.63934	0.0625505	APOE, ABCA1, ABCG1	175	39	16650	7.31868	1	0.52745	69.3976
GOTERM_BP_FAT	GO:0046461~neutral lipid catabolic process	3	1.63934	0.0625505	APOE, ABHD5, FABP4	175	39	16650	7.31868	1	0.52745	69.3976
GOTERM_BP_FAT	GO:0003012~muscle system process	9	4.91803	0.0627993	EDNRB, ATP1B1, ACTA2, CALD1, LMCD1, MYH11, GJA1, TPM1, NMU	175	405	16650	2.11429	1	0.52774	69.5462
GOTERM_BP_FAT	GO:1990748~cellular detoxification	4	2.18579	0.0629436	APOE, DUOX2, TXN, S100A9	175	87	16650	4.37438	1	0.52742	69.6321
GOTERM_BP_FAT	GO:0051384~response to glucocorticoid	5	2.73224	0.0630213	ATP2B1, TYMS, SRD5A1, SPARC, AQP1	175	143	16650	3.32667	1	0.526716	69.6782
GOTERM_BP_FAT	GO:0050801~ion homeostasis	13	7.10383	0.0631319	ATP2B1, EDNRB, ATP1B1, ATP6V0E1, S100A8, ATP1B3, APOE, CLIC4, S100A9, TFAP2B, GJA1, RAB38, CD24	175	699	16650	1.76947	1	0.526206	69.7437
GOTERM_BP_FAT	GO:0060560~developmental growth involved in morphogenesis	6	3.27869	0.0637634	ALCAM, PLXNC1, TNC, POSTN, SPP1, FN1	175	205	16650	2.78467	1	0.528702	70.1154
GOTERM_BP_FAT	GO:0050830~defense response to Gram-positive bacterium	4	2.18579	0.0646847	HIST1H2BD, HIST1H2BK, HIST2H2BE, LYZ	175	88	16650	4.32468	1	0.532821	70.6499
GOTERM_BP_FAT	GO:0006915~apoptotic process	26	14.2077	0.064879	S100A8, S100A9, DICER1, HK2, GJA1, SOX4, AQP1, AKR1C3, EDNRB, SET, APOE, ALDH1A3, PIP, CEACAM5, CD24, SERPINB13, TPD52L1, MAL, FRZB, NCK2, CLIC4, RGCC, TFAP2B, CTSC, FAIM2, PNMA1	175	1747	16650	1.41598	1	0.532778	70.7615
GOTERM_BP_FAT	GO:0008360~regulation of cell shape	5	2.73224	0.0654952	PALMD, MSN, CDC42EP3, TPM1, FN1	175	145	16650	3.28079	1	0.535115	71.1127
GOTERM_BP_FAT	GO:0031032~actomyosin structure organization	5	2.73224	0.0682863	RGCC, ELN, MYH11, TPM1, NEBL	175	147	16650	3.23615	1	0.549427	72.654
GOTERM_BP_FAT	GO:0006417~regulation of translation	8	4.37158	0.0689127	NCK2, TYMS, DIO2, DICER1, S100A9, SOX4, QKI, SYNCRIP	175	343	16650	2.21908	1	0.551682	72.9891
GOTERM_BP_FAT	GO:0000302~response to reactive oxygen species	6	3.27869	0.0696334	AKR1C3, APOE, TXN, COL1A1, AQP1, TPM1	175	210	16650	2.71837	1	0.55442	73.3698
GOTERM_BP_FAT	GO:0098754~detoxification	4	2.18579	0.0700398	APOE, DUOX2, TXN, S100A9	175	91	16650	4.1821	1	0.555452	73.5823
GOTERM_BP_FAT	GO:0046826~negative regulation of protein export from nucleus	2	1.0929	0.0709116	TXN, SOX4	175	7	16650	27.1837	1	0.558942	74.0326
GOTERM_BP_FAT	GO:0042045~epithelial fluid transport	2	1.0929	0.0709116	EDNRB, AQP1	175	7	16650	27.1837	1	0.558942	74.0326
GOTERM_BP_FAT	GO:0010883~regulation of lipid storage	3	1.63934	0.0712363	ABHD5, ABCA1, ABCG1	175	42	16650	6.79592	1	0.559517	74.1985
GOTERM_BP_FAT	GO:0048483~autonomic nervous system development	3	1.63934	0.0712363	EDNRB, TFAP2B, SOX4	175	42	16650	6.79592	1	0.559517	74.1985
GOTERM_BP_FAT	GO:0016053~organic acid biosynthetic process	7	3.82514	0.0719659	AKR1C3, FCER1A, KYNU, RBP1, SCD, ALDH1A3, QKI	175	278	16650	2.39568	1	0.562204	74.5675
GOTERM_BP_FAT	GO:0002793~positive regulation of peptide secretion	4	2.18579	0.0737178	S100A8, S100A9, SOX4, GJA1	175	93	16650	4.09217	1	0.570122	75.4333
GOTERM_BP_FAT	GO:0006334~nucleosome assembly	5	2.73224	0.073751	HIST1H2BD, SET, HIST1H2BK, HIST1H1C, HIST2H2BE	175	151	16650	3.15043	1	0.56916	75.4495
GOTERM_BP_FAT	GO:0030336~negative regulation of cell migration	6	3.27869	0.074138	APOE, CLIC4, KRT16, RGCC, COL3A1, TPM1	175	214	16650	2.66756	1	0.570005	75.6369
GOTERM_BP_FAT	GO:0007568~aging	7	3.82514	0.0741436	ATP2B1, EDNRB, TYMS, KRT16, COL3A1, MMP7, CTSC	175	280	16650	2.37857	1	0.568909	75.6396
GOTERM_BP_FAT	GO:0060322~head development	13	7.10383	0.0750702	ATP2B1, DCT, COL4A1, SERPINE2, ALDH1A3, COL3A1, DUOX2, SRD5A1, COL1A1, AQP1, MMP2, PITX1, FAIM2	175	720	16650	1.71786	1	0.572474	76.0826
GOTERM_BP_FAT	GO:0050730~regulation of peptidyl-tyrosine phosphorylation	6	3.27869	0.0765917	FCER1A, NCK2, ENPP2, PECAM1, CD24, GPRC5A	175	216	16650	2.64286	1	0.578948	76.7937
GOTERM_BP_FAT	GO:0072001~renal system development	7	3.82514	0.0770977	COL4A1, ACTA2, PECAM1, EFNB2, TFAP2B, SOX4, CD24	175	283	16650	2.35336	1	0.580326	77.0257
GOTERM_BP_FAT	GO:0070206~protein trimerization	3	1.63934	0.0772313	COL1A2, COL6A1, COL1A1	175	44	16650	6.48701	1	0.579867	77.0866
GOTERM_BP_FAT	GO:0045446~endothelial cell differentiation	4	2.18579	0.0774803	CLIC4, PECAM1, MSN, CDH5	175	95	16650	4.00602	1	0.579975	77.1997
GOTERM_BP_FAT	GO:0022008~neurogenesis	22	12.0219	0.0775105	PLXNC1, S100A8, TNC, COL3A1, DICER1, EFNB2, S100A9, SOX4, GJA1, POSTN, SPOCK1, ALCAM, DCT, NCK2, EDNRB, SERPINE2, APOE, TCF4, FAIM2, SPP1, FN1, CDH11	175	1447	16650	1.44654	1	0.579014	77.2133
GOTERM_BP_FAT	GO:0071705~nitrogen compound transport	13	7.10383	0.0781136	FCER1A, S100A8, S100A9, SLC6A14, TFAP2B, SOX4, GJA1, QKI, GPM6B, ABCA1, AQP1, SLC1A1, MX2	175	725	16650	1.70601	1	0.58085	77.4849
GOTERM_BP_FAT	GO:0080134~regulation of response to stress	20	10.929	0.0787327	FCER1A, A2M, S100A8, S100A9, HK2, GJA1, TPD52L1, TSPAN8, MMP2, CCL18, NCK2, EDNRB, SERPINE2, HPSE, APOE, TXN, FABP4, CLEC7A, CTSB, SPP1	175	1285	16650	1.48082	1	0.582746	77.7604
GOTERM_BP_FAT	GO:0044255~cellular lipid metabolic process	17	9.28962	0.0794769	FCER1A, CYP3A5, TYRP1, GM2A, RBP1, ENPP2, SCD, ABHD5, UGCG, AKR1C3, AKR1C2, APOE, ALDH1A3, FABP4, QKI, SRD5A1, AKR1C1	175	1043	16650	1.55075	1	0.585223	78.0875
GOTERM_BP_FAT	GO:0007162~negative regulation of cell adhesion	6	3.27869	0.0798275	SERPINE2, TNC, RGCC, POSTN, SPOCK1, COL1A1	175	219	16650	2.60665	1	0.585801	78.24
GOTERM_BP_FAT	GO:0001666~response to hypoxia	7	3.82514	0.0799877	ATP1B1, RGCC, POSTN, CD24, CAPN2, AQP1, MMP2	175	286	16650	2.32867	1	0.585469	78.3093
GOTERM_BP_FAT	GO:0034308~primary alcohol metabolic process	3	1.63934	0.0802866	AKR1C3, RBP1, ALDH1A3	175	45	16650	6.34286	1	0.585798	78.4381
GOTERM_BP_FAT	GO:0021983~pituitary gland development	3	1.63934	0.0802866	DUOX2, SRD5A1, PITX1	175	45	16650	6.34286	1	0.585798	78.4381
GOTERM_BP_FAT	GO:0006570~tyrosine metabolic process	2	1.0929	0.0806251	DCT, TYR	175	8	16650	23.7857	1	0.586312	78.5832
GOTERM_BP_FAT	GO:0060155~platelet dense granule organization	2	1.0929	0.0806251	RAB38, ABCA1	175	8	16650	23.7857	1	0.586312	78.5832
GOTERM_BP_FAT	GO:0001955~blood vessel maturation	2	1.0929	0.0806251	MMP2, CDH5	175	8	16650	23.7857	1	0.586312	78.5832
GOTERM_BP_FAT	GO:0038065~collagen-activated signaling pathway	2	1.0929	0.0806251	COL4A2, COL4A1	175	8	16650	23.7857	1	0.586312	78.5832
GOTERM_BP_FAT	GO:0032594~protein transport within lipid bilayer	2	1.0929	0.0806251	ATP1B1, CD24	175	8	16650	23.7857	1	0.586312	78.5832
GOTERM_BP_FAT	GO:0006885~regulation of pH	4	2.18579	0.0813257	EDNRB, ATP6V0E1, CLIC4, RAB38	175	97	16650	3.92342	1	0.588524	78.8804
GOTERM_BP_FAT	GO:1900047~negative regulation of hemostasis	3	1.63934	0.083379	SERPINE2, APOE, TSPAN8	175	46	16650	6.20497	1	0.596966	79.7291
GOTERM_BP_FAT	GO:0030195~negative regulation of blood coagulation	3	1.63934	0.083379	SERPINE2, APOE, TSPAN8	175	46	16650	6.20497	1	0.596966	79.7291
GOTERM_BP_FAT	GO:0072507~divalent inorganic cation homeostasis	9	4.91803	0.0848525	ATP2B1, EDNRB, ATP1B1, S100A8, APOE, S100A9, TFAP2B, GJA1, CD24	175	433	16650	1.97757	1	0.602594	80.3183
GOTERM_BP_FAT	GO:0048589~developmental growth	11	6.01093	0.0856169	ALCAM, TYMS, PLXNC1, APOE, CLIC4, TNC, DUOX2, GJA1, POSTN, SPP1, FN1	175	583	16650	1.79515	1	0.604954	80.6175
GOTERM_BP_FAT	GO:0031102~neuron projection regeneration	3	1.63934	0.0865074	APOE, TNC, SPP1	175	47	16650	6.07295	1	0.607849	80.9606
GOTERM_BP_FAT	GO:0071396~cellular response to lipid	10	5.46448	0.0866027	AKR1C3, ATP2B1, EDNRB, TNC, MED24, SRD5A1, COL1A1, MSN, ABCA1, AQP1	175	509	16650	1.86921	1	0.607198	80.997
GOTERM_BP_FAT	GO:0001936~regulation of endothelial cell proliferation	4	2.18579	0.0872455	APOE, RGCC, GJA1, SPARC	175	100	16650	3.80571	1	0.608968	81.2407
GOTERM_BP_FAT	GO:2000146~negative regulation of cell motility	6	3.27869	0.0893892	APOE, CLIC4, KRT16, RGCC, COL3A1, TPM1	175	227	16650	2.51479	1	0.617242	82.0321
GOTERM_BP_FAT	GO:0036293~response to decreased oxygen levels	7	3.82514	0.0895788	ATP1B1, RGCC, POSTN, CD24, CAPN2, AQP1, MMP2	175	295	16650	2.25763	1	0.616991	82.1005
GOTERM_BP_FAT	GO:0051452~intracellular pH reduction	3	1.63934	0.0896706	ATP6V0E1, CLIC4, RAB38	175	48	16650	5.94643	1	0.616322	82.1336
GOTERM_BP_FAT	GO:0060324~face development	3	1.63934	0.0896706	ALDH1A3, COL1A1, MMP2	175	48	16650	5.94643	1	0.616322	82.1336
GOTERM_BP_FAT	GO:0010605~negative regulation of macromolecule metabolic process	32	17.4863	0.0896938	ASPN, HIST1H2AC, HIST2H2AA3, A2M, DICER1, GJA1, SOX4, SYNCRIP, SPOCK1, AQP1, GPRC5A, ITM2A, EDNRB, SET, SERPINE2, APOE, COL6A3, QKI, SERPINB13, TCF4, PITX1, HIST1H1C, LMCD1, NCK2, GRB10, BGN, PI3, TXN, TFAP2B, SERPINB1, FABP4, CSTA	175	2326	16650	1.30893	1	0.615361	82.1419
GOTERM_BP_FAT	GO:0007517~muscle organ development	8	4.37158	0.0898499	TAGLN, COL3A1, EFNB2, COL6A3, ELN, GJA1, TPM1, PITX1	175	366	16650	2.07963	1	0.614974	82.198
GOTERM_BP_FAT	GO:0061042~vascular wound healing	2	1.0929	0.0902376	HPSE, MCAM	175	9	16650	21.1429	1	0.615578	82.3365
GOTERM_BP_FAT	GO:0055091~phospholipid homeostasis	2	1.0929	0.0902376	ABCA1, ABCG1	175	9	16650	21.1429	1	0.615578	82.3365
GOTERM_BP_FAT	GO:0043589~skin morphogenesis	2	1.0929	0.0902376	COL1A2, COL1A1	175	9	16650	21.1429	1	0.615578	82.3365
GOTERM_BP_FAT	GO:0034380~high-density lipoprotein particle assembly	2	1.0929	0.0902376	APOE, ABCA1	175	9	16650	21.1429	1	0.615578	82.3365
GOTERM_BP_FAT	GO:1903044~protein localization to membrane raft	2	1.0929	0.0902376	ATP1B1, CD24	175	9	16650	21.1429	1	0.615578	82.3365
GOTERM_BP_FAT	GO:0061299~retina vasculature morphogenesis in camera-type eye	2	1.0929	0.0902376	COL4A1, CLIC4	175	9	16650	21.1429	1	0.615578	82.3365
GOTERM_BP_FAT	GO:0055114~oxidation-reduction process	16	8.74317	0.0907699	CYP3A5, TYRP1, SCD, DUOX2, HK2, AKR1C3, DCT, AKR1C2, GRB10, TYR, DIO2, ALDH1A3, TXN, SRD5A1, LOXL1, AKR1C1	175	983	16650	1.54861	1	0.616794	82.525
GOTERM_BP_FAT	GO:0060537~muscle tissue development	8	4.37158	0.0908339	COL3A1, EFNB2, ELN, MYH11, GJA1, TPM1, PITX1, NEBL	175	367	16650	2.07396	1	0.616018	82.5475
GOTERM_BP_FAT	GO:0019752~carboxylic acid metabolic process	14	7.65027	0.0925296	FCER1A, TYRP1, KYNU, ST6GAL1, RBP1, SCD, ABHD5, SLC6A14, HK2, AKR1C3, AKR1C2, ALDH1A3, QKI, AKR1C1	175	826	16650	1.61259	1	0.622109	83.1347
GOTERM_BP_FAT	GO:0032370~positive regulation of lipid transport	3	1.63934	0.0928677	APOE, ABCA1, ABCG1	175	49	16650	5.82507	1	0.622475	83.2495
GOTERM_BP_FAT	GO:0045851~pH reduction	3	1.63934	0.0928677	ATP6V0E1, CLIC4, RAB38	175	49	16650	5.82507	1	0.622475	83.2495
GOTERM_BP_FAT	GO:0030029~actin filament-based process	12	6.55738	0.0946174	NCK2, RGCC, ELN, S100A9, MYH11, GJA1, ACTN1, GPM6B, AQP1, CDC42EP3, TPM1, NEBL	175	672	16650	1.69898	1	0.628649	83.832
GOTERM_BP_FAT	GO:0061387~regulation of extent of cell growth	4	2.18579	0.0954129	PLXNC1, APOE, SPP1, FN1	175	104	16650	3.65934	1	0.63085	84.0904
GOTERM_BP_FAT	GO:0006493~protein O-linked glycosylation	4	2.18579	0.0954129	GALNT1, ST6GAL1, MUC5AC, MUC4	175	104	16650	3.65934	1	0.63085	84.0904
GOTERM_BP_FAT	GO:0071407~cellular response to organic cyclic compound	10	5.46448	0.0956752	AKR1C3, ATP2B1, TNC, DICER1, MED24, SRD5A1, COL1A1, MSN, ABCA1, AQP1	175	520	16650	1.82967	1	0.630878	84.1748
GOTERM_BP_FAT	GO:0043436~oxoacid metabolic process	14	7.65027	0.0958228	FCER1A, TYRP1, KYNU, ST6GAL1, RBP1, SCD, ABHD5, SLC6A14, HK2, AKR1C3, AKR1C2, ALDH1A3, QKI, AKR1C1	175	831	16650	1.60289	1	0.630442	84.2221
GOTERM_BP_FAT	GO:0033059~cellular pigmentation	3	1.63934	0.0960976	TYRP1, PMEL, RAB38	175	50	16650	5.70857	1	0.630522	84.3098
GOTERM_BP_FAT	GO:0050819~negative regulation of coagulation	3	1.63934	0.0960976	SERPINE2, APOE, TSPAN8	175	50	16650	5.70857	1	0.630522	84.3098
GOTERM_BP_FAT	GO:0046503~glycerolipid catabolic process	3	1.63934	0.0960976	APOE, ABHD5, FABP4	175	50	16650	5.70857	1	0.630522	84.3098
GOTERM_BP_FAT	GO:0097305~response to alcohol	5	2.73224	0.096239	TYMS, S100A8, TNC, ABCA1, SPARC	175	166	16650	2.86575	1	0.630065	84.3547
GOTERM_BP_FAT	GO:0000904~cell morphogenesis involved in differentiation	13	7.10383	0.0966049	PLXNC1, EFNB2, ACTN1, POSTN, ALCAM, APOE, CLIC4, RGCC, PECAM1, COL1A1, SPP1, CDH11, FN1	175	753	16650	1.64257	1	0.630511	84.4704
GOTERM_BP_FAT	GO:0031347~regulation of defense response	12	6.55738	0.0975907	FCER1A, EDNRB, A2M, S100A8, APOE, S100A9, GJA1, FABP4, CLEC7A, CTSB, MMP2, CCL18	175	676	16650	1.68893	1	0.633423	84.7781
GOTERM_BP_FAT	GO:0008016~regulation of heart contraction	6	3.27869	0.0981833	ATP2B1, ATP1B1, ATP1B3, GJA1, SLC1A1, TPM1	175	233	16650	2.45003	1	0.634751	84.9603
GOTERM_BP_FAT	GO:0031497~chromatin assembly	5	2.73224	0.0981907	HIST1H2BD, SET, HIST1H2BK, HIST1H1C, HIST2H2BE	175	167	16650	2.84859	1	0.633765	84.9626
GOTERM_BP_FAT	GO:0009892~negative regulation of metabolic process	34	18.5792	0.098241	ASPN, HIST1H2AC, HIST2H2AA3, A2M, DICER1, HK2, GJA1, SOX4, SYNCRIP, SPOCK1, AQP1, GPRC5A, ITM2A, AKR1C3, EDNRB, SET, SERPINE2, APOE, COL6A3, QKI, SERPINB13, TCF4, PITX1, HIST1H1C, LMCD1, NCK2, GRB10, BGN, PI3, TXN, TFAP2B, SERPINB1, FABP4, CSTA	175	2522	16650	1.28266	1	0.632952	84.978
GOTERM_BP_FAT	GO:1902533~positive regulation of intracellular signal transduction	15	8.19672	0.0984645	FCER1A, S100A8, COL3A1, S100A9, LMCD1, GJA1, TPD52L1, CCL18, AKR1C3, AKR1C2, NCK2, HPSE, PECAM1, TXN, CD24	175	915	16650	1.55972	1	0.632823	85.0461
GOTERM_BP_FAT	GO:1901137~carbohydrate derivative biosynthetic process	13	7.10383	0.0987325	TYMS, EDNRB, ST6GAL1, GALNT1, BGN, APOE, UGCG, MUC5AC, ABCA1, AQP1, DSE, MUC4, ITM2A	175	756	16650	1.63605	1	0.632871	85.1274
GOTERM_BP_FAT	GO:0050810~regulation of steroid biosynthetic process	3	1.63934	0.0993593	AKR1C3, APOE, ABCG1	175	51	16650	5.59664	1	0.63432	85.3158
GOTERM_BP_FAT	GO:0032526~response to retinoic acid	4	2.18579	0.0996102	TNC, COL1A1, ABCA1, AQP1	175	106	16650	3.5903	1	0.634298	85.3906
GOTERM_BP_FAT	GO:0060346~bone trabecula formation	2	1.0929	0.0997502	COL1A1, MMP2	175	10	16650	19.0286	1	0.633844	85.4322

## Sheet: upregulated DEGs-CC
Category	Term	Count	%	PValue	Genes	List Total	Pop Hits	Pop Total	Fold Enrichment	Bonferroni	Benjamini	FDR
GOTERM_CC_FAT	GO:0044421~extracellular region part	107	58.4699	3.62633e-22	ASPN, HIST2H2AA3, ATP1B1, A2M, LTBP1, ATP1B3, LTBP2, S100A8, TUBB2A, S100A9, MMP7, POSTN, TSPAN8, AQP1, MMP2, ATP2B1, SERPINE2, HIST1H2BK, APOE, SPARCL1, ACTN1, MGP, KRT10, NEBL, CPE, KRT16, COL1A2, CSTA, COL1A1, SNRPE, ENPP2, MSMB, ELN, ABCA1, ALCAM, UPK1B, PIP, TFF1, FN1, SPP1, CPA4, ST6GAL1, S100P, SLC6A14, LMCD1, MCAM, MUC4, PDZK1IP1, COL14A1, DSG3, PI3, MYH11, FABP4, RPL37A, MUC5AC, GM2A, MA…	173	3878	14527	2.31689	1.42878e-19	1.42878e-19	5.0469e-19
GOTERM_CC_FAT	GO:0031988~membrane-bounded vesicle	99	54.0984	1.45261e-19	HIST2H2AA3, A2M, ATP1B1, ATP1B3, LTBP2, S100A8, TUBB2A, S100A9, MMP7, TSPAN8, AQP1, ATP2B1, SERPINE2, APOE, SPARCL1, MGP, ACTN1, KRT10, NEBL, CPE, KRT16, COL1A2, HLA-DPA1, CSTA, COL1A1, SNRPE, ABCA1, ALCAM, UPK1B, PIP, FN1, SPP1, ST6GAL1, S100P, PMEL, SLC6A14, MUC4, PDZK1IP1, COL14A1, DSG3, PI3, MYH11, FABP4, RPL37A, MUC5AC, ATP6V0E1, CLTB, GM2A, MARCKSL1, DUOX2, GJA1, AKR1C3, TYR, CD93, CEACAM5,…	173	3611	14527	2.30217	5.72327e-17	2.86163e-17	2.02165e-16
GOTERM_CC_FAT	GO:0005576~extracellular region	111	60.6557	2.56288e-18	ASPN, HIST2H2AA3, ATP1B1, A2M, LTBP1, ATP1B3, LTBP2, S100A8, TUBB2A, S100A9, MMP7, POSTN, TSPAN8, AQP1, MMP2, ATP2B1, SERPINE2, HIST1H2BK, APOE, CLCA2, SPARCL1, ACTN1, MGP, KRT10, NEBL, CPE, KRT16, COL1A2, CSTA, COL1A1, SNRPE, ENPP2, MSMB, ELN, ABCA1, ALCAM, UPK1B, PIP, TFF1, FN1, SPP1, CPA4, ST6GAL1, S100P, PMEL, SLC6A14, LMCD1, MCAM, MUC4, PDZK1IP1, COL14A1, DSG3, PI3, MYH11, FABP4, RPL37A, MUC…	173	4623	14527	2.01618	1.00978e-15	3.36592e-16	3.56686e-15
GOTERM_CC_FAT	GO:0031012~extracellular matrix	37	20.2186	7.29949e-18	ASPN, LTBP1, LTBP2, TNC, S100A9, COL3A1, ELN, MMP7, SPOCK1, POSTN, MMP2, SERPINE2, CD93, APOE, HPSE, PRSS2, COL6A3, COL6A1, LOXL1, THBS2, FN1, COL4A2, COL4A1, SPARCL1, LMCD1, COL15A1, MGP, SPARC, MUC4, VWF, COL14A1, BGN, PI3, COL1A2, COL1A1, MUC5AC, CSTA	173	530	14527	5.86213	2.876e-15	7.19e-16	1.0159e-14
GOTERM_CC_FAT	GO:0005578~proteinaceous extracellular matrix	30	16.3934	2.11773e-16	ASPN, LTBP1, LTBP2, TNC, COL3A1, ELN, MMP7, POSTN, SPOCK1, MMP2, HPSE, COL6A3, COL6A1, LOXL1, THBS2, FN1, COL4A2, COL4A1, SPARCL1, COL15A1, MGP, SPARC, MUC4, VWF, COL14A1, BGN, PI3, COL1A2, COL1A1, MUC5AC	173	361	14527	6.97821	8.74856e-14	1.75415e-14	3.10862e-13
GOTERM_CC_FAT	GO:1903561~extracellular vesicle	81	44.2623	5.4972e-16	HIST2H2AA3, ATP1B1, A2M, ATP1B3, GM2A, LTBP2, S100A8, TUBB2A, MARCKSL1, S100A9, DUOX2, MMP7, GJA1, TSPAN8, AQP1, ATP2B1, AKR1C3, SERPINE2, APOE, CEACAM5, MSN, SLC1A1, AKR1C1, SPARCL1, ACTA2, LYZ, MGP, ACTN1, KRT10, NEBL, BGN, CPE, KRT16, HIST2H2BE, CLIC4, TXN, SPRR3, COL1A2, SERPINB1, CTSC, CTSB, CSTA, SNRPE, HIST1H2AC, KRT6A, KRT6B, PLVAP, GPRC5A, ITM2A, ALCAM, ALDH1A3, COL6A3, UPK1B, PIP, COL6A…	173	2825	14527	2.40767	2.18714e-13	3.64153e-14	7.77156e-13
GOTERM_CC_FAT	GO:0043230~extracellular organelle	81	44.2623	5.58952e-16	HIST2H2AA3, ATP1B1, A2M, ATP1B3, GM2A, LTBP2, S100A8, TUBB2A, MARCKSL1, S100A9, DUOX2, MMP7, GJA1, TSPAN8, AQP1, ATP2B1, AKR1C3, SERPINE2, APOE, CEACAM5, MSN, SLC1A1, AKR1C1, SPARCL1, ACTA2, LYZ, MGP, ACTN1, KRT10, NEBL, BGN, CPE, KRT16, HIST2H2BE, CLIC4, TXN, SPRR3, COL1A2, SERPINB1, CTSC, CTSB, CSTA, SNRPE, HIST1H2AC, KRT6A, KRT6B, PLVAP, GPRC5A, ITM2A, ALCAM, ALDH1A3, COL6A3, UPK1B, PIP, COL6A…	173	2826	14527	2.40681	2.18714e-13	3.11973e-14	7.77156e-13
GOTERM_CC_FAT	GO:0070062~extracellular exosome	80	43.7158	1.6423e-15	HIST2H2AA3, ATP1B1, A2M, ATP1B3, GM2A, LTBP2, S100A8, TUBB2A, MARCKSL1, S100A9, DUOX2, MMP7, GJA1, TSPAN8, AQP1, ATP2B1, AKR1C3, APOE, CEACAM5, MSN, SLC1A1, AKR1C1, SPARCL1, ACTA2, LYZ, MGP, ACTN1, KRT10, NEBL, BGN, CPE, KRT16, HIST2H2BE, CLIC4, TXN, SPRR3, COL1A2, SERPINB1, CTSC, CTSB, CSTA, SNRPE, HIST1H2AC, KRT6A, KRT6B, PLVAP, GPRC5A, ITM2A, ALCAM, ALDH1A3, COL6A3, UPK1B, PIP, COL6A1, SERPINB…	173	2811	14527	2.38979	6.56142e-13	8.20455e-14	2.32037e-12
GOTERM_CC_FAT	GO:0005615~extracellular space	51	27.8689	1.3327e-12	A2M, S100A8, LTBP2, S100A9, MMP7, POSTN, MMP2, HIST1H2BK, SERPINE2, APOE, MSN, LOXL1, ACTA2, SPARCL1, LYZ, ACTN1, KRT10, CPE, HIST2H2BE, COL1A2, SERPINB1, CTSC, COL1A1, CTSB, CSTA, MSMB, ENPP2, TNC, COL3A1, SPOCK1, ABCA1, PCSK2, PRSS2, COL6A3, PIP, SERPINB13, TFF1, SPP1, FN1, CPA4, HIST1H2BD, LMCD1, COL15A1, SPARC, FRZB, MCAM, CCL18, MUC4, COL14A1, PECAM1, MUC5AC	173	1444	14527	2.96574	5.25088e-10	5.83431e-11	1.85478e-09
GOTERM_CC_FAT	GO:0044420~extracellular matrix component	17	9.28962	2.18446e-12	COL4A2, LTBP1, COL4A1, TNC, COL3A1, ELN, COL15A1, SPARC, COL14A1, COL6A3, COL1A2, COL6A1, COL1A1, MUC5AC, THBS2, LOXL1, FN1	173	128	14527	11.1524	8.60683e-10	8.60683e-11	3.04021e-09
GOTERM_CC_FAT	GO:0098644~complex of collagen trimers	7	3.82514	2.15655e-07	COL4A2, COL4A1, COL3A1, COL6A3, COL1A2, COL6A1, COL1A1	173	23	14527	25.5564	8.49643e-05	7.72433e-06	0.000300134
GOTERM_CC_FAT	GO:0031091~platelet alpha granule	9	4.91803	2.81905e-06	VWF, A2M, SERPINE2, PECAM1, ACTN1, PCDH7, SPARC, THBS2, FN1	173	75	14527	10.0765	0.00111009	9.25545e-05	0.0039233
GOTERM_CC_FAT	GO:0016023~cytoplasmic, membrane-bounded vesicle	34	18.5792	2.85651e-06	TYRP1, ATP6V0E1, A2M, CLTB, ATP1B3, GJA1, ABCA1, GPRC5A, DCT, PCSK2, TYR, SERPINE2, CD93, APOE, LOXL1, THBS2, MLANA, FN1, PMEL, ACTN1, SPARC, PCDH7, VWF, RAB31, BGN, CPE, CLIC4, PECAM1, MYH11, CTSC, HLA-DPA1, COL1A1, RAB38, CTSB	173	1183	14527	2.41337	0.00112483	8.65705e-05	0.00397544
GOTERM_CC_FAT	GO:0045121~membrane raft	14	7.65027	2.60019e-05	ATP2B1, EDNRB, ATP1B1, ATP1B3, HPSE, PECAM1, GJA1, MAL, GPM6B, PLVAP, ABCA1, CD24, CAPN2, FAIM2	173	277	14527	4.24403	0.0101926	0.000731509	0.0361817
GOTERM_CC_FAT	GO:0098857~membrane microdomain	14	7.65027	2.69897e-05	ATP2B1, EDNRB, ATP1B1, ATP1B3, HPSE, PECAM1, GJA1, MAL, GPM6B, PLVAP, ABCA1, CD24, CAPN2, FAIM2	173	278	14527	4.22876	0.0105777	0.000708687	0.037556
GOTERM_CC_FAT	GO:0005581~collagen trimer	9	4.91803	2.79494e-05	COL4A2, COL14A1, COL4A1, COL3A1, COL6A3, COL1A2, COL15A1, COL6A1, COL1A1	173	102	14527	7.40921	0.0109518	0.000688027	0.0388912
GOTERM_CC_FAT	GO:0048770~pigment granule	9	4.91803	3.69271e-05	DCT, TYRP1, TYR, ATP1B3, PMEL, MYH11, RAB38, CTSB, MLANA	173	106	14527	7.12962	0.0144442	0.000855489	0.0513806
GOTERM_CC_FAT	GO:0042470~melanosome	9	4.91803	3.69271e-05	DCT, TYRP1, TYR, ATP1B3, PMEL, MYH11, RAB38, CTSB, MLANA	173	106	14527	7.12962	0.0144442	0.000855489	0.0513806
GOTERM_CC_FAT	GO:0044433~cytoplasmic vesicle part	21	11.4754	4.06263e-05	TYRP1, ATP6V0E1, A2M, CLTB, GJA1, ACTN1, SPARC, PCDH7, GPRC5A, DCT, PCSK2, VWF, TYR, RAB31, CPE, CLIC4, APOE, PECAM1, HLA-DPA1, RAB38, FN1	173	615	14527	2.86731	0.0158796	0.000888886	0.0565263
GOTERM_CC_FAT	GO:0098589~membrane region	15	8.19672	8.22933e-05	ATP2B1, EDNRB, ATP1B1, CLTB, ATP1B3, HPSE, PECAM1, GJA1, MAL, GPM6B, PLVAP, ABCA1, CD24, CAPN2, FAIM2	173	354	14527	3.5581	0.0319048	0.00170512	0.11447
GOTERM_CC_FAT	GO:0005604~basement membrane	8	4.37158	0.000132937	COL4A2, COL4A1, TNC, COL15A1, SPARC, THBS2, LOXL1, FN1	173	95	14527	7.07125	0.0510326	0.00261561	0.184855
GOTERM_CC_FAT	GO:0033162~melanosome membrane	4	2.18579	0.000250971	DCT, TYRP1, TYR, RAB38	173	11	14527	30.5349	0.0941621	0.00469821	0.34872
GOTERM_CC_FAT	GO:0045009~chitosome	4	2.18579	0.000250971	DCT, TYRP1, TYR, RAB38	173	11	14527	30.5349	0.0941621	0.00469821	0.34872
GOTERM_CC_FAT	GO:0005788~endoplasmic reticulum lumen	10	5.46448	0.000673327	COL4A2, COL14A1, COL4A1, COL3A1, COL6A3, COL1A2, COL15A1, COL6A1, CTSC, COL1A1	173	202	14527	4.15699	0.233086	0.0119903	0.93303
GOTERM_CC_FAT	GO:0030141~secretory granule	13	7.10383	0.0011556	PCSK2, VWF, A2M, CPE, SERPINE2, PECAM1, ACTN1, COL1A1, PCDH7, SPARC, THBS2, LOXL1, FN1	173	358	14527	3.04923	0.365912	0.0196124	1.59634
GOTERM_CC_FAT	GO:0045177~apical part of cell	13	7.10383	0.00124088	ATP2B1, ATP1B1, GM2A, CLIC4, DUOX2, UPK1B, PIP, GJA1, MAL, MSN, AQP1, SLC1A1, FN1	173	361	14527	3.02389	0.38689	0.0201775	1.71321
GOTERM_CC_FAT	GO:0060205~cytoplasmic membrane-bounded vesicle lumen	7	3.82514	0.00154493	PCSK2, VWF, A2M, APOE, ACTN1, SPARC, FN1	173	105	14527	5.59807	0.4562	0.0240725	2.12882
GOTERM_CC_FAT	GO:0031983~vesicle lumen	7	3.82514	0.00162185	PCSK2, VWF, A2M, APOE, ACTN1, SPARC, FN1	173	106	14527	5.54526	0.472459	0.0242972	2.2337
GOTERM_CC_FAT	GO:0001533~cornified envelope	5	2.73224	0.00210199	SPRR1A, SPRR1B, SPRR2B, SPRR3, CSTA	173	46	14527	9.12729	0.563538	0.0302391	2.88603
GOTERM_CC_FAT	GO:0016324~apical plasma membrane	11	6.01093	0.00259463	ATP2B1, ATP1B1, DUOX2, UPK1B, PIP, GJA1, MAL, MSN, AQP1, SLC1A1, FN1	173	293	14527	3.1525	0.640706	0.0358975	3.55115
GOTERM_CC_FAT	GO:0009897~external side of plasma membrane	10	5.46448	0.00265999	ALCAM, FCER1A, SERPINE2, PECAM1, CEACAM5, CD24, ABCA1, MCAM, ABCG1, CDH5	173	246	14527	3.41346	0.649864	0.0355405	3.63908
GOTERM_CC_FAT	GO:0012506~vesicle membrane	15	8.19672	0.00284894	TYRP1, ATP6V0E1, CLTB, SPARC, PCDH7, GPRC5A, DCT, NCK2, RAB31, TYR, CPE, CLIC4, PECAM1, HLA-DPA1, RAB38	173	507	14527	2.48435	0.67505	0.0367762	3.89284
GOTERM_CC_FAT	GO:0034774~secretory granule lumen	6	3.27869	0.00353138	PCSK2, VWF, A2M, ACTN1, SPARC, FN1	173	86	14527	5.85845	0.751876	0.0439664	4.80422
GOTERM_CC_FAT	GO:0098651~basement membrane collagen trimer	3	1.63934	0.00372389	COL4A2, COL4A1, COL15A1	173	8	14527	31.4892	0.770063	0.0448969	5.05985
GOTERM_CC_FAT	GO:0031093~platelet alpha granule lumen	5	2.73224	0.004046	VWF, A2M, ACTN1, SPARC, FN1	173	55	14527	7.63374	0.797569	0.0472519	5.48616
GOTERM_CC_FAT	GO:0043292~contractile fiber	9	4.91803	0.00525262	ACTA2, CALD1, PECAM1, MYH11, GJA1, ACTN1, TPM1, MMP2, NEBL	173	224	14527	3.37384	0.874442	0.059204	7.06737
GOTERM_CC_FAT	GO:0030659~cytoplasmic vesicle membrane	14	7.65027	0.00566716	DCT, TYRP1, ATP6V0E1, TYR, RAB31, CLTB, CPE, CLIC4, PECAM1, HLA-DPA1, RAB38, PCDH7, SPARC, GPRC5A	173	491	14527	2.39429	0.893458	0.0619739	7.60491
GOTERM_CC_FAT	GO:0098552~side of membrane	13	7.10383	0.0066326	ALCAM, ATP2B1, FCER1A, SERPINE2, GM2A, PECAM1, HLA-DPA1, CEACAM5, ABCA1, CD24, MCAM, CDH5, ABCG1	173	444	14527	2.45861	0.927339	0.0702429	8.84565
GOTERM_CC_FAT	GO:0098590~plasma membrane region	21	11.4754	0.0074727	ATP1B1, CLCA2, CLTB, S100P, ATP1B3, DUOX2, SLC6A14, GJA1, PLVAP, MAL, AQP1, TPM1, ATP2B1, CPE, UPK1B, PIP, CEACAM5, MSN, SLC1A1, FAIM2, FN1	173	936	14527	1.88397	0.947937	0.0767663	9.91269
GOTERM_CC_FAT	GO:0098643~banded collagen fibril	3	1.63934	0.00850885	COL3A1, COL1A2, COL1A1	173	12	14527	20.9928	0.965501	0.0847892	11.2128
GOTERM_CC_FAT	GO:0005583~fibrillar collagen trimer	3	1.63934	0.00850885	COL3A1, COL1A2, COL1A1	173	12	14527	20.9928	0.965501	0.0847892	11.2128
GOTERM_CC_FAT	GO:0000786~nucleosome	6	3.27869	0.00884639	HIST2H2AA3, HIST1H2AC, HIST1H2BD, HIST1H2BK, HIST1H1C, HIST2H2BE	173	107	14527	4.70866	0.969832	0.0858575	11.6325
GOTERM_CC_FAT	GO:0009986~cell surface	18	9.83607	0.00931059	FCER1A, MMP7, PLVAP, SPARC, ABCA1, MCAM, ABCG1, CDH5, ALCAM, LY6D, BGN, SERPINE2, CD93, CLIC4, PECAM1, CEACAM5, HLA-DPA1, CD24	173	765	14527	1.97579	0.974917	0.0880215	12.2068
GOTERM_CC_FAT	GO:0099503~secretory vesicle	13	7.10383	0.00970701	PCSK2, VWF, A2M, CPE, SERPINE2, PECAM1, ACTN1, COL1A1, PCDH7, SPARC, THBS2, LOXL1, FN1	173	467	14527	2.33753	0.978576	0.0894784	12.6944
GOTERM_CC_FAT	GO:0031092~platelet alpha granule membrane	3	1.63934	0.00997819	PECAM1, PCDH7, SPARC	173	13	14527	19.3779	0.980767	0.0897856	13.0266
GOTERM_CC_FAT	GO:0044815~DNA packaging complex	6	3.27869	0.0110414	HIST2H2AA3, HIST1H2AC, HIST1H2BD, HIST1H2BK, HIST1H1C, HIST2H2BE	173	113	14527	4.45864	0.987406	0.0967293	14.3176
GOTERM_CC_FAT	GO:0090533~cation-transporting ATPase complex	3	1.63934	0.0149985	ATP1B1, ATP1B3, GM2A	173	16	14527	15.7446	0.997405	0.126566	18.9676
GOTERM_CC_FAT	GO:0031226~intrinsic component of plasma membrane	31	16.9399	0.0163334	KCNJ15, ATP1B1, PLXNC1, ATP1B3, GM2A, ENPP2, GJA1, TSPAN7, TSPAN8, ABCA1, AQP1, GPRC5A, ATP2B1, ALCAM, EDNRB, APLNR, UPK1B, CEACAM5, CD24, SLC1A1, MLANA, FCER1A, CLCA2, PMEL, EFNB2, SLC6A14, MAL, PCDH7, ABCG1, MUC4, HLA-DPA1	173	1701	14527	1.53034	0.998479	0.134275	20.4826
GOTERM_CC_FAT	GO:0031143~pseudopodium	3	1.63934	0.0168674	ACTN1, MSN, CAPN2	173	17	14527	14.8184	0.998772	0.135588	21.0814
GOTERM_CC_FAT	GO:0005887~integral component of plasma membrane	30	16.3934	0.0169647	KCNJ15, ATP1B1, PLXNC1, ATP1B3, GM2A, ENPP2, GJA1, TSPAN7, TSPAN8, ABCA1, AQP1, GPRC5A, ATP2B1, ALCAM, EDNRB, APLNR, UPK1B, CEACAM5, SLC1A1, MLANA, FCER1A, CLCA2, PMEL, EFNB2, SLC6A14, MAL, PCDH7, ABCG1, MUC4, HLA-DPA1	173	1635	14527	1.54075	0.998819	0.133623	21.19
GOTERM_CC_FAT	GO:0005925~focal adhesion	11	6.01093	0.0181065	ALCAM, TNC, EFNB2, GJA1, ACTN1, RPL37A, MSN, CAPN2, MCAM, PNMA1, TES	173	391	14527	2.36236	0.999253	0.13928	22.4544
GOTERM_CC_FAT	GO:0005924~cell-substrate adherens junction	11	6.01093	0.0189857	ALCAM, TNC, EFNB2, GJA1, ACTN1, RPL37A, MSN, CAPN2, MCAM, PNMA1, TES	173	394	14527	2.34437	0.999475	0.142838	23.4152
GOTERM_CC_FAT	GO:0030055~cell-substrate junction	11	6.01093	0.0205204	ALCAM, TNC, EFNB2, GJA1, ACTN1, RPL37A, MSN, CAPN2, MCAM, PNMA1, TES	173	399	14527	2.31499	0.999717	0.150734	25.0659
GOTERM_CC_FAT	GO:0070161~anchoring junction	16	8.74317	0.0217324	S100P, TNC, CALD1, EFNB2, GJA1, ACTN1, MCAM, CAPN2, GPRC5A, CDH5, ALCAM, DSG3, RPL37A, MSN, PNMA1, TES	173	711	14527	1.88964	0.999826	0.15612	26.3461
GOTERM_CC_FAT	GO:0005584~collagen type I trimer	2	1.0929	0.0235407	COL1A2, COL1A1	173	2	14527	83.9711	0.999916	0.165146	28.2184
GOTERM_CC_FAT	GO:0098791~Golgi subcompartment	9	4.91803	0.0279399	NCK2, GALNT1, ST6GAL1, RAB31, CLTB, POSTN, HLA-DPA1, RAB38, MLANA	173	303	14527	2.49419	0.999986	0.189951	32.5906
GOTERM_CC_FAT	GO:0005802~trans-Golgi network	7	3.82514	0.0318251	NCK2, RAB31, CLTB, POSTN, HLA-DPA1, RAB38, MLANA	173	200	14527	2.93899	0.999997	0.210204	36.245
GOTERM_CC_FAT	GO:0098533~ATPase dependent transmembrane transport complex	3	1.63934	0.032435	ATP1B1, ATP1B3, GM2A	173	24	14527	10.4964	0.999998	0.21038	36.8017
GOTERM_CC_FAT	GO:1904949~ATPase complex	3	1.63934	0.032435	ATP1B1, ATP1B3, GM2A	173	24	14527	10.4964	0.999998	0.21038	36.8017
GOTERM_CC_FAT	GO:0005783~endoplasmic reticulum	29	15.847	0.0338534	CYP3A5, GALNT1, COL3A1, SYNCRIP, GJA1, ABCA1, DSE, SET, APOE, COL6A3, COL6A1, SRD5A1, MLANA, COL4A2, COL4A1, SCD, PMEL, COL15A1, MAL, CAPN2, ABCG1, VWF, NCK2, COL14A1, COL1A2, CTSC, HLA-DPA1, COL1A1, RAB38	173	1660	14527	1.46696	0.999999	0.215185	38.079
GOTERM_CC_FAT	GO:0030139~endocytic vesicle	8	4.37158	0.0346319	TYRP1, ATP6V0E1, RAB31, APOE, HLA-DPA1, RAB38, ABCA1, SPARC	173	259	14527	2.5937	0.999999	0.216222	38.7698
GOTERM_CC_FAT	GO:0005589~collagen type VI trimer	2	1.0929	0.0351036	COL6A3, COL6A1	173	3	14527	55.9807	0.999999	0.215531	39.1848
GOTERM_CC_FAT	GO:0098647~collagen beaded filament	2	1.0929	0.0351036	COL6A3, COL6A1	173	3	14527	55.9807	0.999999	0.215531	39.1848
GOTERM_CC_FAT	GO:0044449~contractile fiber part	7	3.82514	0.0352609	ACTA2, PECAM1, MYH11, ACTN1, TPM1, MMP2, NEBL	173	205	14527	2.86731	0.999999	0.213154	39.3227
GOTERM_CC_FAT	GO:0005912~adherens junction	15	8.19672	0.0362586	S100P, TNC, CALD1, EFNB2, GJA1, ACTN1, MCAM, CAPN2, GPRC5A, CDH5, ALCAM, RPL37A, MSN, PNMA1, TES	173	694	14527	1.81494	1	0.215353	40.1902
GOTERM_CC_FAT	GO:0031984~organelle subcompartment	9	4.91803	0.0379722	NCK2, GALNT1, ST6GAL1, RAB31, CLTB, POSTN, HLA-DPA1, RAB38, MLANA	173	322	14527	2.34702	1	0.221231	41.6534
GOTERM_CC_FAT	GO:0044431~Golgi apparatus part	18	9.83607	0.0416395	ST6GAL1, GALNT1, CLTB, UGCG, GJA1, POSTN, DSE, ABCG1, MUC4, NCK2, RAB31, TYR, BGN, CTSC, HLA-DPA1, MUC5AC, RAB38, MLANA	173	910	14527	1.66097	1	0.236834	44.6738
GOTERM_CC_FAT	GO:0030485~smooth muscle contractile fiber	2	1.0929	0.0465303	ACTA2, PECAM1	173	4	14527	41.9855	1	0.257689	48.4764
GOTERM_CC_FAT	GO:0042383~sarcolemma	5	2.73224	0.049006	ATP1B1, BGN, COL6A3, COL6A1, AQP1	173	116	14527	3.61944	1	0.266066	50.3074
GOTERM_CC_FAT	GO:0005775~vacuolar lumen	5	2.73224	0.049006	BGN, GM2A, HPSE, RAB38, CTSB	173	116	14527	3.61944	1	0.266066	50.3074
GOTERM_CC_FAT	GO:0032993~protein-DNA complex	6	3.27869	0.0610892	HIST2H2AA3, HIST1H2AC, HIST1H2BD, HIST1H2BK, HIST1H1C, HIST2H2BE	173	179	14527	2.81467	1	0.317565	58.4087
GOTERM_CC_FAT	GO:0044432~endoplasmic reticulum part	21	11.4754	0.0643231	CYP3A5, COL4A2, GALNT1, COL4A1, SCD, PMEL, COL3A1, COL15A1, GJA1, ABCA1, CAPN2, ABCG1, COL14A1, COL6A3, COL1A2, COL6A1, CTSC, SRD5A1, HLA-DPA1, COL1A1, MLANA	173	1177	14527	1.49821	1	0.327596	60.3587
GOTERM_CC_FAT	GO:0005587~collagen type IV trimer	2	1.0929	0.0689818	COL4A2, COL4A1	173	6	14527	27.9904	1	0.343166	63.0189
GOTERM_CC_FAT	GO:0005794~Golgi apparatus	25	13.6612	0.0702225	ST6GAL1, GALNT1, CLTB, PMEL, UGCG, GJA1, POSTN, ABCA1, CAPN2, DSE, ABCG1, MUC4, ITM2A, NCK2, TYR, RAB31, BGN, CPE, APOE, CTSC, HLA-DPA1, COL1A1, MUC5AC, RAB38, MLANA	173	1482	14527	1.41652	1	0.344181	63.699
GOTERM_CC_FAT	GO:0048471~perinuclear region of cytoplasm	13	7.10383	0.07728	TYR, GALNT1, SET, CLIC4, KIAA0101, TPD52L1, SRD5A1, PLVAP, ABCA1, CTSB, MSN, CAPN2, SPP1	173	639	14527	1.70833	1	0.368252	67.3514
GOTERM_CC_FAT	GO:0030667~secretory granule membrane	4	2.18579	0.0776656	CPE, PECAM1, PCDH7, SPARC	173	84	14527	3.99862	1	0.365587	67.5408
GOTERM_CC_FAT	GO:0098645~collagen network	2	1.0929	0.0800096	COL4A2, COL4A1	173	7	14527	23.9917	1	0.370461	68.6701
GOTERM_CC_FAT	GO:0098642~network-forming collagen trimer	2	1.0929	0.0800096	COL4A2, COL4A1	173	7	14527	23.9917	1	0.370461	68.6701
GOTERM_CC_FAT	GO:0043202~lysosomal lumen	4	2.18579	0.0865107	BGN, GM2A, HPSE, CTSB	173	88	14527	3.81687	1	0.390518	71.6146
GOTERM_CC_FAT	GO:0045335~phagocytic vesicle	4	2.18579	0.0887861	ATP6V0E1, RAB31, RAB38, ABCA1	173	89	14527	3.77398	1	0.394575	72.583
GOTERM_CC_FAT	GO:0016323~basolateral plasma membrane	6	3.27869	0.0950627	ATP2B1, ATP1B1, CLCA2, CEACAM5, MSN, AQP1	173	204	14527	2.46974	1	0.41248	75.0975
GOTERM_CC_FAT	GO:0000788~nuclear nucleosome	3	1.63934	0.0955035	HIST1H2BD, HIST1H2BK, HIST2H2BE	173	44	14527	5.7253	1	0.409811	75.2658
GOTERM_CC_FAT	GO:0005882~intermediate filament	6	3.27869	0.0977448	KRT6A, KRT6B, KRT16, GJA1, KRT10, KRT23	173	206	14527	2.44576	1	0.413297	76.1053

## Sheet: upregulated DEGs-MF
Category	Term	Count	%	PValue	Genes	List Total	Pop Hits	Pop Total	Fold Enrichment	Bonferroni	Benjamini	FDR
GOTERM_MF_FAT	GO:0005198~structural molecule activity	32	17.4863	2.18456e-10	KRT6A, CLTB, KRT6B, TUBB2A, COL3A1, ELN, TPM1, KRT23, SPRR2B, UPK1B, MSN, COL4A2, COL4A1, COL15A1, MGP, KRT10, MAL, MUC4, NEBL, NCK2, COL14A1, BGN, SPRR1A, KRT16, SPRR1B, MYH11, SPRR3, COL1A2, RPL37A, COL1A1, MUC5AC, CSTA	167	782	15478	3.79264	1.38938e-07	1.38938e-07	3.25215e-07
GOTERM_MF_FAT	GO:0005201~extracellular matrix structural constituent	12	6.55738	1.12346e-09	COL4A2, BGN, COL14A1, COL4A1, COL3A1, ELN, COL1A2, COL15A1, MGP, COL1A1, MUC5AC, MUC4	167	82	15478	13.5633	7.14523e-07	3.57262e-07	1.6725e-06
GOTERM_MF_FAT	GO:0048407~platelet-derived growth factor binding	5	2.73224	3.97101e-06	COL4A1, COL3A1, COL1A2, COL6A1, COL1A1	167	11	15478	42.1285	0.00252238	0.000841501	0.00591147
GOTERM_MF_FAT	GO:0061134~peptidase regulator activity	12	6.55738	2.55391e-05	A2M, SERPINE2, COL6A3, PI3, TFAP2B, SERPINB1, CTSC, MAL, SPOCK1, SERPINB13, CSTA, FN1	167	220	15478	5.05542	0.0161119	0.00405253	0.0380133
GOTERM_MF_FAT	GO:0005509~calcium ion binding	22	12.0219	2.77835e-05	ASPN, LTBP1, S100P, S100A8, LTBP2, ENPP2, SPARCL1, DUOX2, S100A9, MGP, ACTN1, SPOCK1, SPARC, PCDH7, CAPN2, CDH5, CD93, DSG3, PRSS2, THBS2, S100A2, CDH11	167	717	15478	2.84382	0.0175154	0.00352788	0.0413533
GOTERM_MF_FAT	GO:0005518~collagen binding	7	3.82514	6.23185e-05	ASPN, VWF, COL14A1, SPARCL1, SPARC, CTSB, FN1	167	64	15478	10.1372	0.0388606	0.00658419	0.0927333
GOTERM_MF_FAT	GO:0047086~ketosteroid monooxygenase activity	3	1.63934	0.000340591	AKR1C3, AKR1C2, AKR1C1	167	3	15478	92.6826	0.19479	0.0304763	0.505839
GOTERM_MF_FAT	GO:0019838~growth factor binding	8	4.37158	0.000458476	A2M, COL4A1, LTBP1, LTBP2, COL3A1, COL1A2, COL6A1, COL1A1	167	128	15478	5.79266	0.252976	0.0358007	0.680365
GOTERM_MF_FAT	GO:0032403~protein complex binding	20	10.929	0.000569234	FCER1A, ASPN, ATP1B1, SPARCL1, COL3A1, ACTN1, TSPAN8, SPARC, TPM1, NEBL, PCSK2, VWF, NCK2, GRB10, COL14A1, PIP, MYH11, RAB38, CTSB, FN1	167	766	15478	2.41991	0.303812	0.0394386	0.844077
GOTERM_MF_FAT	GO:0004866~endopeptidase inhibitor activity	9	4.91803	0.000578923	A2M, SERPINE2, COL6A3, PI3, TFAP2B, SERPINB1, SPOCK1, SERPINB13, CSTA	167	174	15478	4.79393	0.308092	0.0361602	0.858387
GOTERM_MF_FAT	GO:0004867~serine-type endopeptidase inhibitor activity	7	3.82514	0.000614184	A2M, SERPINE2, COL6A3, PI3, SERPINB1, SPOCK1, SERPINB13	167	97	15478	6.68844	0.323445	0.0348984	0.910446
GOTERM_MF_FAT	GO:0018636~phenanthrene 9,10-monooxygenase activity	3	1.63934	0.000676373	AKR1C3, AKR1C2, AKR1C1	167	4	15478	69.512	0.349698	0.0352245	1.0022
GOTERM_MF_FAT	GO:0047023~androsterone dehydrogenase activity	3	1.63934	0.000676373	AKR1C3, AKR1C2, AKR1C1	167	4	15478	69.512	0.349698	0.0352245	1.0022
GOTERM_MF_FAT	GO:0047115~trans-1,2-dihydrobenzene-1,2-diol dehydrogenase activity	3	1.63934	0.000676373	AKR1C3, AKR1C2, AKR1C1	167	4	15478	69.512	0.349698	0.0352245	1.0022
GOTERM_MF_FAT	GO:0061135~endopeptidase regulator activity	9	4.91803	0.0007252	A2M, SERPINE2, COL6A3, PI3, TFAP2B, SERPINB1, SPOCK1, SERPINB13, CSTA	167	180	15478	4.63413	0.369596	0.0348694	1.07419
GOTERM_MF_FAT	GO:0030414~peptidase inhibitor activity	9	4.91803	0.000811393	A2M, SERPINE2, COL6A3, PI3, TFAP2B, SERPINB1, SPOCK1, SERPINB13, CSTA	167	183	15478	4.55816	0.403249	0.0362038	1.20114
GOTERM_MF_FAT	GO:0030234~enzyme regulator activity	23	12.5683	0.000983195	ASPN, ATP1B1, A2M, ATP1B3, GM2A, MAL, SPOCK1, BGN, SET, SERPINE2, APOE, RGS5, COL6A3, RGCC, PI3, TFAP2B, SERPINB1, CTSC, SERPINB13, CD24, CSTA, CDC42EP3, FN1	167	996	15478	2.14026	0.46507	0.0408502	1.45373
GOTERM_MF_FAT	GO:0016628~oxidoreductase activity, acting on the CH-CH group of donors, NAD or NADP as acceptor	4	2.18579	0.00234268	AKR1C3, AKR1C2, SRD5A1, AKR1C1	167	25	15478	14.8292	0.775009	0.0890168	3.43139
GOTERM_MF_FAT	GO:0050840~extracellular matrix binding	5	2.73224	0.00248253	BGN, SPARCL1, ELN, SPARC, SPP1	167	53	15478	8.74364	0.794201	0.0887987	3.63272
GOTERM_MF_FAT	GO:0004032~alditol:NADP+ 1-oxidoreductase activity	3	1.63934	0.00306841	AKR1C3, AKR1C2, AKR1C1	167	8	15478	34.756	0.858366	0.102896	4.47189
GOTERM_MF_FAT	GO:0004857~enzyme inhibitor activity	12	6.55738	0.00320357	ASPN, A2M, BGN, SET, SERPINE2, COL6A3, PI3, TFAP2B, SERPINB1, SPOCK1, SERPINB13, CSTA	167	389	15478	2.8591	0.870068	0.10184	4.66452
GOTERM_MF_FAT	GO:0005102~receptor binding	28	15.3005	0.00358875	A2M, PLXNC1, S100A8, COL3A1, S100A9, MED24, GJA1, TSPAN8, ABCA1, CDH5, ALCAM, EDNRB, SERPINE2, APOE, TFF1, MSN, NMU, SPP1, FN1, S100P, EFNB2, ACTN1, CCL18, MUC4, VWF, GRB10, CPE, CLEC7A	167	1462	15478	1.77504	0.898384	0.108034	5.21147
GOTERM_MF_FAT	GO:0016229~steroid dehydrogenase activity	4	2.18579	0.00436816	AKR1C3, AKR1C2, SRD5A1, AKR1C1	167	31	15478	11.959	0.938224	0.124169	6.30929
GOTERM_MF_FAT	GO:0046982~protein heterodimerization activity	13	7.10383	0.00440348	HIST1H2AC, HIST2H2AA3, TYRP1, HIST1H2BD, SOX4, TPD52L1, CAPN2, ABCG1, TYR, HIST1H2BK, HIST2H2BE, TFAP2B, TCF4	167	465	15478	2.59113	0.939602	0.119779	6.35877
GOTERM_MF_FAT	GO:0033293~monocarboxylic acid binding	5	2.73224	0.00464928	AKR1C2, S100A8, S100A9, FABP4, AKR1C1	167	63	15478	7.35576	0.94838	0.120905	6.70235
GOTERM_MF_FAT	GO:0004497~monooxygenase activity	6	3.27869	0.00502595	AKR1C3, CYP3A5, AKR1C2, TYRP1, TYR, AKR1C1	167	103	15478	5.39899	0.959423	0.124993	7.22658
GOTERM_MF_FAT	GO:0050786~RAGE receptor binding	3	1.63934	0.00590114	S100P, S100A8, S100A9	167	11	15478	25.2771	0.976815	0.139782	8.43402
GOTERM_MF_FAT	GO:0046983~protein dimerization activity	23	12.5683	0.00635371	HIST2H2AA3, HIST1H2AC, TYRP1, KYNU, HIST1H2BD, SOX4, ACTN1, TPD52L1, PLVAP, CAPN2, ABCG1, TYMS, VWF, TYR, HIST1H2BK, HPSE, HIST2H2BE, APOE, ALDH1A3, PIP, TFAP2B, CEACAM5, TCF4	167	1160	15478	1.83767	0.982645	0.14437	9.05265
GOTERM_MF_FAT	GO:0044877~macromolecular complex binding	25	13.6612	0.00644431	ASPN, FCER1A, ATP1B1, HIST1H1C, SPARCL1, COL3A1, KIAA0101, ACTN1, TSPAN8, SPARC, TPM1, NEBL, PCSK2, NCK2, VWF, GRB10, COL14A1, APOE, TFAP2B, MYH11, PIP, RAB38, CTSB, TCF4, FN1	167	1306	15478	1.77417	0.983622	0.141261	9.17602
GOTERM_MF_FAT	GO:0005200~structural constituent of cytoskeleton	6	3.27869	0.00662027	KRT6A, KRT6B, TUBB2A, KRT16, MSN, TPM1	167	110	15478	5.05542	0.985367	0.140045	9.41518
GOTERM_MF_FAT	GO:0005539~glycosaminoglycan binding	8	4.37158	0.00719879	BGN, LTBP2, SERPINE2, APOE, MMP7, POSTN, THBS2, FN1	167	208	15478	3.56472	0.989898	0.146533	10.1974
GOTERM_MF_FAT	GO:0008201~heparin binding	7	3.82514	0.00759769	LTBP2, SERPINE2, APOE, MMP7, POSTN, THBS2, FN1	167	160	15478	4.05487	0.992176	0.149292	10.733
GOTERM_MF_FAT	GO:0042626~ATPase activity, coupled to transmembrane movement of substances	6	3.27869	0.00767524	ATP2B1, ATP1B1, ATP6V0E1, ATP1B3, ABCA1, ABCG1	167	114	15478	4.87803	0.992556	0.146213	10.8368
GOTERM_MF_FAT	GO:0030674~protein binding, bridging	7	3.82514	0.00806008	NCK2, GRB10, COL14A1, SPRR1A, SPRR1B, COL1A2, CSTA	167	162	15478	4.00481	0.994183	0.148574	11.3502
GOTERM_MF_FAT	GO:0016820~hydrolase activity, acting on acid anhydrides, catalyzing transmembrane movement of substances	6	3.27869	0.0082443	ATP2B1, ATP1B1, ATP6V0E1, ATP1B3, ABCA1, ABCG1	167	116	15478	4.79393	0.994831	0.147472	11.595
GOTERM_MF_FAT	GO:0016705~oxidoreductase activity, acting on paired donors, with incorporation or reduction of molecular oxygen	7	3.82514	0.00900504	AKR1C3, CYP3A5, AKR1C2, TYRP1, TYR, SCD, AKR1C1	167	166	15478	3.9083	0.996827	0.155669	12.5991
GOTERM_MF_FAT	GO:0015405~P-P-bond-hydrolysis-driven transmembrane transporter activity	6	3.27869	0.0108137	ATP2B1, ATP1B1, ATP6V0E1, ATP1B3, ABCA1, ABCG1	167	124	15478	4.48464	0.999007	0.179278	14.944
GOTERM_MF_FAT	GO:0015399~primary active transmembrane transporter activity	6	3.27869	0.0108137	ATP2B1, ATP1B1, ATP6V0E1, ATP1B3, ABCA1, ABCG1	167	124	15478	4.48464	0.999007	0.179278	14.944
GOTERM_MF_FAT	GO:0017127~cholesterol transporter activity	3	1.63934	0.0109536	APOE, ABCA1, ABCG1	167	15	15478	18.5365	0.999093	0.17682	15.1229
GOTERM_MF_FAT	GO:0050839~cell adhesion molecule binding	12	6.55738	0.0110077	VWF, S100P, CPE, CALD1, COL3A1, ACTN1, POSTN, TSPAN8, MSN, GPRC5A, FN1, TES	167	461	15478	2.41256	0.999124	0.173258	15.192
GOTERM_MF_FAT	GO:0043492~ATPase activity, coupled to movement of substances	6	3.27869	0.0126712	ATP2B1, ATP1B1, ATP6V0E1, ATP1B3, ABCA1, ABCG1	167	129	15478	4.31082	0.9997	0.192191	17.2909
GOTERM_MF_FAT	GO:0060090~binding, bridging	7	3.82514	0.0127644	NCK2, GRB10, COL14A1, SPRR1A, SPRR1B, COL1A2, CSTA	167	179	15478	3.62446	0.999717	0.189008	17.4071
GOTERM_MF_FAT	GO:1901681~sulfur compound binding	8	4.37158	0.0129403	LTBP2, SERPINE2, APOE, HPSE, MMP7, POSTN, THBS2, FN1	167	233	15478	3.18224	0.999747	0.187056	17.6259
GOTERM_MF_FAT	GO:0008106~alcohol dehydrogenase (NADP+) activity	3	1.63934	0.01399	AKR1C3, AKR1C2, AKR1C1	167	17	15478	16.3558	0.999872	0.196315	18.9205
GOTERM_MF_FAT	GO:0005496~steroid binding	5	2.73224	0.0153925	AKR1C2, APOE, ABCA1, AKR1C1, ABCG1	167	89	15478	5.20689	0.999948	0.209349	20.6205
GOTERM_MF_FAT	GO:0008047~enzyme activator activity	12	6.55738	0.0175936	ATP1B1, A2M, ATP1B3, GM2A, APOE, RGCC, RGS5, CTSC, MAL, CD24, CDC42EP3, FN1	167	494	15478	2.2514	0.999987	0.230903	23.2217
GOTERM_MF_FAT	GO:0015248~sterol transporter activity	3	1.63934	0.0191391	APOE, ABCA1, ABCG1	167	20	15478	13.9024	0.999995	0.243709	25.0003
GOTERM_MF_FAT	GO:0008092~cytoskeletal protein binding	17	9.28962	0.0196294	S100A8, MARCKSL1, CALD1, S100A9, GJA1, ACTN1, CAPN2, TPM1, NEBL, NCK2, TAGLN, APOE, PIP, MYH11, MSN, MX2, CDC42EP3	167	846	15478	1.86242	0.999997	0.244358	25.5565
GOTERM_MF_FAT	GO:0004869~cysteine-type endopeptidase inhibitor activity	4	2.18579	0.022181	TFAP2B, SPOCK1, SERPINB13, CSTA	167	56	15478	6.62019	0.999999	0.266648	28.3893
GOTERM_MF_FAT	GO:0019865~immunoglobulin binding	3	1.63934	0.0229467	FCER1A, VWF, PIP	167	22	15478	12.6385	1	0.269577	29.2196
GOTERM_MF_FAT	GO:0005507~copper ion binding	4	2.18579	0.0232333	DCT, TYRP1, TYR, LOXL1	167	57	15478	6.50404	1	0.267634	29.5281
GOTERM_MF_FAT	GO:0098772~molecular function regulator	24	13.1148	0.0253488	ASPN, ATP1B1, A2M, ATP1B3, GM2A, MAL, SPOCK1, NCK2, BGN, SET, SERPINE2, APOE, RGS5, COL6A3, RGCC, PI3, TFAP2B, SERPINB1, CTSC, SERPINB13, CSTA, CD24, CDC42EP3, FN1	167	1397	15478	1.59226	1	0.283415	31.7664
GOTERM_MF_FAT	GO:0016627~oxidoreductase activity, acting on the CH-CH group of donors	4	2.18579	0.0265506	AKR1C3, AKR1C2, SRD5A1, AKR1C1	167	60	15478	6.17884	1	0.289856	33.0082
GOTERM_MF_FAT	GO:0005178~integrin binding	5	2.73224	0.0272659	VWF, COL3A1, ACTN1, TSPAN8, FN1	167	106	15478	4.37182	1	0.291598	33.7373
GOTERM_MF_FAT	GO:0016651~oxidoreductase activity, acting on NAD(P)H	5	2.73224	0.0280957	AKR1C3, AKR1C2, DUOX2, TXN, AKR1C1	167	107	15478	4.33096	1	0.29429	34.5738
GOTERM_MF_FAT	GO:0022853~active ion transmembrane transporter activity	5	2.73224	0.0306748	ATP2B1, ATP1B1, ATP6V0E1, ATP1B3, SLC1A1	167	110	15478	4.21285	1	0.311928	37.1114
GOTERM_MF_FAT	GO:0047718~indanol dehydrogenase activity	2	1.0929	0.0318329	AKR1C3, AKR1C1	167	3	15478	61.7884	1	0.316834	38.2208
GOTERM_MF_FAT	GO:0016716~oxidoreductase activity, acting on paired donors, with incorporation or reduction of molecular oxygen, another compound as one donor, and incorporation of one atom of oxygen	2	1.0929	0.0318329	TYRP1, TYR	167	3	15478	61.7884	1	0.316834	38.2208
GOTERM_MF_FAT	GO:0031406~carboxylic acid binding	6	3.27869	0.0318734	AKR1C2, S100A8, S100A9, FABP4, SLC1A1, AKR1C1	167	164	15478	3.39083	1	0.312418	38.2593
GOTERM_MF_FAT	GO:0008236~serine-type peptidase activity	8	4.37158	0.0325412	PCSK2, CPE, PRSS2, MMP7, CTSC, CTSB, PRSS23, MMP2	167	282	15478	2.62929	1	0.313207	38.8902
GOTERM_MF_FAT	GO:0043168~anion binding	8	4.37158	0.0330772	AKR1C2, KYNU, S100A8, S100A9, FABP4, CTSC, SLC1A1, AKR1C1	167	283	15478	2.62	1	0.312926	39.3923
GOTERM_MF_FAT	GO:0033764~steroid dehydrogenase activity, acting on the CH-OH group of donors, NAD or NADP as acceptor	3	1.63934	0.0336753	AKR1C3, AKR1C2, AKR1C1	167	27	15478	10.2981	1	0.313142	39.948
GOTERM_MF_FAT	GO:0004033~aldo-keto reductase (NADP) activity	3	1.63934	0.0336753	AKR1C3, AKR1C2, AKR1C1	167	27	15478	10.2981	1	0.313142	39.948
GOTERM_MF_FAT	GO:0019829~cation-transporting ATPase activity	4	2.18579	0.0339034	ATP2B1, ATP1B1, ATP6V0E1, ATP1B3	167	66	15478	5.61713	1	0.310512	40.1587
GOTERM_MF_FAT	GO:0017171~serine hydrolase activity	8	4.37158	0.0341667	PCSK2, CPE, PRSS2, MMP7, CTSC, CTSB, PRSS23, MMP2	167	285	15478	2.60162	1	0.308228	40.401
GOTERM_MF_FAT	GO:0002020~protease binding	5	2.73224	0.0372205	VWF, A2M, SERPINB13, CSTA, FN1	167	117	15478	3.9608	1	0.32664	43.1456
GOTERM_MF_FAT	GO:0005504~fatty acid binding	3	1.63934	0.0384156	S100A8, S100A9, FABP4	167	29	15478	9.58786	1	0.330911	44.1872
GOTERM_MF_FAT	GO:0035662~Toll-like receptor 4 binding	2	1.0929	0.0422184	S100A8, S100A9	167	4	15478	46.3413	1	0.353035	47.3844
GOTERM_MF_FAT	GO:0043178~alcohol binding	4	2.18579	0.0451735	RBP1, APOE, ABCA1, ABCG1	167	74	15478	5.00987	1	0.368317	49.7501
GOTERM_MF_FAT	GO:0042803~protein homodimerization activity	14	7.65027	0.0505744	TYRP1, KYNU, ACTN1, TPD52L1, PLVAP, ABCG1, VWF, TYMS, TYR, APOE, ALDH1A3, TFAP2B, CEACAM5, TCF4	167	730	15478	1.77748	1	0.398184	53.8192
GOTERM_MF_FAT	GO:0015662~ATPase activity, coupled to transmembrane movement of ions, phosphorylative mechanism	3	1.63934	0.0512784	ATP2B1, ATP1B1, ATP1B3	167	34	15478	8.17788	1	0.397855	54.3264
GOTERM_MF_FAT	GO:0042625~ATPase coupled ion transmembrane transporter activity	4	2.18579	0.0514206	ATP2B1, ATP1B1, ATP6V0E1, ATP1B3	167	78	15478	4.75296	1	0.394142	54.4282
GOTERM_MF_FAT	GO:0050544~arachidonic acid binding	2	1.0929	0.0524932	S100A8, S100A9	167	5	15478	37.0731	1	0.396085	55.1893
GOTERM_MF_FAT	GO:0035671~enone reductase activity	2	1.0929	0.0524932	AKR1C3, SRD5A1	167	5	15478	37.0731	1	0.396085	55.1893
GOTERM_MF_FAT	GO:0016209~antioxidant activity	4	2.18579	0.0563659	APOE, DUOX2, TXN, S100A9	167	81	15478	4.57692	1	0.414192	57.8399
GOTERM_MF_FAT	GO:0004252~serine-type endopeptidase activity	7	3.82514	0.0570204	PCSK2, PRSS2, MMP7, CTSC, CTSB, PRSS23, MMP2	167	255	15478	2.54423	1	0.413409	58.2731
GOTERM_MF_FAT	GO:0033218~amide binding	7	3.82514	0.0614696	EDNRB, TYMS, CLTB, APOE, SRD5A1, HLA-DPA1, ITM2A	167	260	15478	2.4953	1	0.433501	61.1099
GOTERM_MF_FAT	GO:0016504~peptidase activator activity	3	1.63934	0.0625128	CTSC, MAL, FN1	167	38	15478	7.31705	1	0.434594	61.7485
GOTERM_MF_FAT	GO:0045545~syndecan binding	2	1.0929	0.0626584	HPSE, TNC	167	6	15478	30.8942	1	0.430931	61.8368
GOTERM_MF_FAT	GO:0050543~icosatetraenoic acid binding	2	1.0929	0.0626584	S100A8, S100A9	167	6	15478	30.8942	1	0.430931	61.8368
GOTERM_MF_FAT	GO:0050542~icosanoid binding	2	1.0929	0.0626584	S100A8, S100A9	167	6	15478	30.8942	1	0.430931	61.8368
GOTERM_MF_FAT	GO:0030197~extracellular matrix constituent, lubricant activity	2	1.0929	0.0626584	MUC5AC, MUC4	167	6	15478	30.8942	1	0.430931	61.8368
GOTERM_MF_FAT	GO:0003779~actin binding	9	4.91803	0.0644059	TAGLN, MARCKSL1, CALD1, PIP, MYH11, ACTN1, MSN, TPM1, NEBL	167	397	15478	2.10112	1	0.435702	62.8824
GOTERM_MF_FAT	GO:0001076~transcription factor activity, RNA polymerase II transcription factor binding	5	2.73224	0.0708162	TFAP2B, SOX4, MED24, TCF4, PITX1	167	145	15478	3.19595	1	0.463584	66.4935
GOTERM_MF_FAT	GO:0015485~cholesterol binding	3	1.63934	0.0714311	APOE, ABCA1, ABCG1	167	41	15478	6.78166	1	0.462157	66.8221
GOTERM_MF_FAT	GO:0001758~retinal dehydrogenase activity	2	1.0929	0.0727152	AKR1C3, ALDH1A3	167	7	15478	26.4808	1	0.46397	67.4986
GOTERM_MF_FAT	GO:0008307~structural constituent of muscle	3	1.63934	0.0744907	MYH11, TPM1, NEBL	167	42	15478	6.62019	1	0.468046	68.4128
GOTERM_MF_FAT	GO:0016709~oxidoreductase activity, acting on paired donors, with incorporation or reduction of molecular oxygen, NAD(P)H as one donor, and incorporation of one atom of oxygen	3	1.63934	0.0775916	AKR1C3, AKR1C2, AKR1C1	167	43	15478	6.46623	1	0.478073	69.9522
GOTERM_MF_FAT	GO:0032052~bile acid binding	2	1.0929	0.0826647	AKR1C2, AKR1C1	167	8	15478	23.1707	1	0.496385	72.3206
GOTERM_MF_FAT	GO:0004175~endopeptidase activity	10	5.46448	0.0856173	PCSK2, CLCA2, PRSS2, PIP, MMP7, CTSC, CTSB, CAPN2, PRSS23, MMP2	167	495	15478	1.87238	1	0.504798	73.6177
GOTERM_MF_FAT	GO:0032934~sterol binding	3	1.63934	0.0871303	APOE, ABCA1, ABCG1	167	46	15478	6.04452	1	0.506909	74.2601
GOTERM_MF_FAT	GO:0008233~peptidase activity	13	7.10383	0.0958021	PCSK2, CPA4, CLCA2, CPE, PRSS2, ABHD5, PIP, MMP7, CTSC, CTSB, CAPN2, PRSS23, MMP2	167	733	15478	1.64376	1	0.537765	77.6697
GOTERM_MF_FAT	GO:0001948~glycoprotein binding	4	2.18579	0.0989326	VWF, HPSE, PIP, CTSB	167	103	15478	3.59933	1	0.54559	78.7934

## Sheet: upregulated DEGs-KEGG
Category	Term	Count	%	PValue	Genes	List Total	Pop Hits	Pop Total	Fold Enrichment	Bonferroni	Benjamini	FDR
KEGG_PATHWAY	hsa04974:Protein digestion and absorption	14	7.65027	1.39816e-10	COL4A2, ATP1B1, COL4A1, ATP1B3, ELN, COL3A1, COL15A1, COL14A1, PRSS2, COL6A3, COL1A2, COL6A1, COL1A1, SLC1A1	96	88	6910	11.4512	1.92947e-08	1.92947e-08	1.64553e-07
KEGG_PATHWAY	hsa04512:ECM-receptor interaction	12	6.55738	2.18265e-08	VWF, COL4A2, COL4A1, TNC, COL3A1, COL6A3, COL1A2, COL6A1, COL1A1, THBS2, SPP1, FN1	96	87	6910	9.92816	3.01205e-06	1.50603e-06	2.56881e-05
KEGG_PATHWAY	hsa04510:Focal adhesion	14	7.65027	4.07296e-06	COL4A2, COL4A1, TNC, COL3A1, ACTN1, CAPN2, VWF, COL6A3, COL1A2, COL6A1, COL1A1, THBS2, SPP1, FN1	96	206	6910	4.89179	0.000561912	0.000187339	0.00479345
KEGG_PATHWAY	hsa05146:Amoebiasis	9	4.91803	9.47497e-05	COL4A2, COL4A1, COL3A1, COL1A2, SERPINB1, ACTN1, COL1A1, SERPINB13, FN1	96	106	6910	6.11144	0.012991	0.00326368	0.111456
KEGG_PATHWAY	hsa04151:PI3K-Akt signaling pathway	12	6.55738	0.00741679	VWF, COL4A2, COL4A1, TNC, COL3A1, COL6A3, COL1A2, COL6A1, COL1A1, THBS2, SPP1, FN1	96	345	6910	2.50362	0.642039	0.185732	8.38866
KEGG_PATHWAY	hsa00140:Steroid hormone biosynthesis	5	2.73224	0.00807212	AKR1C3, CYP3A5, AKR1C2, SRD5A1, AKR1C1	96	58	6910	6.2051	0.673222	0.170069	9.09799
KEGG_PATHWAY	hsa05322:Systemic lupus erythematosus	7	3.82514	0.0100951	HIST2H2AA3, HIST1H2AC, HIST1H2BD, HIST1H2BK, HIST2H2BE, ACTN1, HLA-DPA1	96	134	6910	3.76011	0.753452	0.181292	11.256
KEGG_PATHWAY	hsa00350:Tyrosine metabolism	4	2.18579	0.0119872	DCT, TYRP1, TYR, ALDH1A3	96	35	6910	8.22619	0.810664	0.187817	13.232
KEGG_PATHWAY	hsa04972:Pancreatic secretion	5	2.73224	0.0387136	ATP2B1, ATP1B1, CLCA2, ATP1B3, PRSS2	96	93	6910	3.86985	0.995698	0.454146	37.1666
KEGG_PATHWAY	hsa04964:Proximal tubule bicarbonate reclamation	3	1.63934	0.0392386	ATP1B1, ATP1B3, AQP1	96	23	6910	9.38859	0.99601	0.424435	37.5693
KEGG_PATHWAY	hsa04670:Leukocyte transendothelial migration	5	2.73224	0.0788924	PECAM1, ACTN1, MSN, MMP2, CDH5	96	118	6910	3.04996	0.999988	0.643338	61.9845
KEGG_PATHWAY	hsa00980:Metabolism of xenobiotics by cytochrome P450	4	2.18579	0.0812418	CYP3A5, AKR1C2, ALDH1A3, AKR1C1	96	74	6910	3.89077	0.999992	0.622589	63.1101
